# Supplementary material
Source: publisher figshare collection journal article supplement (https://frontiersin.figshare.com/ndownloader/files/21196122)
Supplement: Supplementary file 1 [file 21196122]

## Sheet: MIDOC
Table S2-1. Micronekton samples collected on the south coast of Australia in September 2017. Where Sample ID represents the operation number of the tow (OP#) followed by the codend number (CE#) of the IGYPT net, water mass is the sampling location, D/N designates the tow as being conducted during the day (D) or night (N), TD is the time spent at depth (hours), SL_mm is the standard length (mm), T…
SampleID	Water_mass	Depth_range_m	D/N	TempC	TD (h)	MorphoSpecies_Corrected	Family	Species	SL_mm	TL_mm	cw_mg
OP3CE2	BCCE	400 - 500	n	9.9162	9	MYCTO	Myctophidae	Diaphus sp	62.384	72.814	237.733
OP3CE2	BCCE	400 - 500	n	9.9162	9	MYCTO	Myctophidae	Diaphus sp	66.093	76.523	281.112
OP3CE2	BCCE	400 - 500	n	9.9162	9	MYCTO	Myctophidae	Diaphus sp	57.74	68.17	189.93
OP3CE2	BCCE	400 - 500	n	9.9162	9	MYCTO	Myctophidae	Diaphus sp	64.07	74.5	256.862
OP3CE2	BCCE	400 - 500	n	9.9162	9	MYCTO	Myctophidae	Diaphus sp	57.19	67.62	184.727
OP3CE2	BCCE	400 - 500	n	9.9162	9	MYCTO	Myctophidae	Diaphus sp	64.931	75.361	267.008
OP3CE2	BCCE	400 - 500	n	9.9162	9	MYCTO	Myctophidae	Diaphus sp	58.472	68.902	197.002
OP3CE2	BCCE	400 - 500	n	9.9162	9	MYCTO	Myctophidae	Diaphus sp	58.472	68.902	197.002
OP3CE2	BCCE	400 - 500	n	9.9162	9	MYCTO	Myctophidae	Diaphus sp	62.298	72.728	236.784
OP3CE2	BCCE	400 - 500	n	9.9162	9	MYCTO	Myctophidae	Diaphus sp	56.874	67.304	181.781
OP3CE2	BCCE	400 - 500	n	9.9162	9	MYCTO	Myctophidae	Diaphus sp	54.522	64.952	160.812
OP3CE2	BCCE	400 - 500	n	9.9162	9	MYCTO	Myctophidae	Diaphus sp	57.974	68.404	192.172
OP3CE2	BCCE	400 - 500	n	9.9162	9	MYCTO	Myctophidae	Diaphus sp	57.476	67.906	187.421
OP3CE2	BCCE	400 - 500	n	9.9162	9	MYCTO	Myctophidae	Diaphus sp	12.906	23.336	2.45643
OP3CE2	BCCE	400 - 500	n	9.9162	9	MYCTO	Myctophidae	Diaphus sp	33.272	43.702	38.3584
OP3CE2	BCCE	400 - 500	n	9.9162	9	MYCTO	Myctophidae	Diaphus sp	26.98	37.41	20.8772
OP3CE2	BCCE	400 - 500	n	9.9162	9	MYCTO	Myctophidae	Diaphus sp	66.491	76.921	286.052
OP3CE2	BCCE	400 - 500	n	9.9162	9	MYCTO	Myctophidae	Diaphus sp	59.386	69.816	206.072
OP3CE2	BCCE	400 - 500	n	9.9162	9	MYCTO	Myctophidae	Diaphus sp	69.459	79.889	324.701
OP3CE2	BCCE	400 - 500	n	9.9162	9	MYCTO	Myctophidae	Diaphus sp	68.271	78.701	308.846
OP3CE2	BCCE	400 - 500	n	9.9162	9	MYCTO	Myctophidae	Diaphus sp	83.691	94.121	557.701
OP3CE2	BCCE	400 - 500	n	9.9162	9	MYCTO	Myctophidae	Diaphus sp	62.553	72.983	239.607
OP3CE2	BCCE	400 - 500	n	9.9162	9	MYCTO	Myctophidae	Diaphus sp	65.785	76.215	277.327
OP3CE2	BCCE	400 - 500	n	9.9162	9	MYCTO	Myctophidae	Diaphus sp	67.416	77.846	297.754
OP3CE2	BCCE	400 - 500	n	9.9162	9	MYCTO	Myctophidae	Diaphus sp	69.011	79.441	318.661
OP3CE2	BCCE	400 - 500	n	9.9162	9	MYCTO	Myctophidae	Diaphus sp	49.754	60.184	123.306
OP3CE2	BCCE	400 - 500	n	9.9162	9	MYCTO	Myctophidae	Diaphus sp	68.664	79.094	314.033
OP3CE2	BCCE	400 - 500	n	9.9162	9	MYCTO	Myctophidae	Diaphus sp	68.087	78.517	306.436
OP3CE2	BCCE	400 - 500	n	9.9162	9	MYCTO	Myctophidae	Diaphus sp	58.862	69.292	200.839
OP3CE2	BCCE	400 - 500	n	9.9162	9	MYCTO	Myctophidae	Diaphus sp	59.248	69.678	204.685
OP3CE2	BCCE	400 - 500	n	9.9162	9	MYCTO	Myctophidae	Diaphus sp	67.191	77.621	294.88
OP3CE2	BCCE	400 - 500	n	9.9162	9	MYCTO	Myctophidae	Diaphus sp	66.056	76.486	280.655
OP3CE2	BCCE	400 - 500	n	9.9162	9	MYCTO	Myctophidae	Diaphus sp	75.879	86.309	419.663
OP3CE2	BCCE	400 - 500	n	9.9162	9	MYCTO	Myctophidae	Diaphus sp	67.293	77.723	296.18
OP3CE2	BCCE	400 - 500	n	9.9162	9	MYCTO	Myctophidae	Diaphus sp	69.57	80	326.209
OP3CE2	BCCE	400 - 500	n	9.9162	9	MYCTO	Myctophidae	Diaphus sp	62.168	72.598	235.353
OP3CE2	BCCE	400 - 500	n	9.9162	9	MYCTO	Myctophidae	Diaphus sp	65.543	75.973	274.377
OP3CE2	BCCE	400 - 500	n	9.9162	9	MYCTO	Myctophidae	Diaphus sp	62.348	72.778	237.336
OP3CE2	BCCE	400 - 500	n	9.9162	9	MYCTO	Myctophidae	Diaphus sp	53.674	64.104	153.661
OP3CE2	BCCE	400 - 500	n	9.9162	9	MYCTO	Myctophidae	Diaphus sp	69.806	80.236	329.431
OP3CE2	BCCE	400 - 500	n	9.9162	9	MYCTO	Myctophidae	Diaphus sp	71.078	81.508	347.155
OP3CE2	BCCE	400 - 500	n	9.9162	9	MYCTO	Myctophidae	Diaphus sp	69.053	79.483	319.224
OP3CE2	BCCE	400 - 500	n	9.9162	9	MYCTO	Myctophidae	Diaphus sp	57.722	68.152	189.758
OP3CE2	BCCE	400 - 500	n	9.9162	9	MYCTO	Myctophidae	Diaphus sp	69.734	80.164	328.446
OP3CE2	BCCE	400 - 500	n	9.9162	9	MYCTO	Myctophidae	Diaphus sp	61.975	72.405	233.238
OP3CE2	BCCE	400 - 500	n	9.9162	9	MYCTO	Myctophidae	Diaphus sp	78.403	88.833	461.468
OP3CE2	BCCE	400 - 500	n	9.9162	9	MYCTO	Myctophidae	Diaphus sp	58.83	69.26	200.523
OP3CE2	BCCE	400 - 500	n	9.9162	9	MYCTO	Myctophidae	Diaphus sp	74.421	84.851	396.687
OP3CE2	BCCE	400 - 500	n	9.9162	9	MYCTO	Myctophidae	Diaphus sp	69.577	80.007	326.305
OP3CE2	BCCE	400 - 500	n	9.9162	9	MYCTO	Myctophidae	Diaphus sp	60.395	70.825	216.398
OP3CE2	BCCE	400 - 500	n	9.9162	9	MYCTO	Myctophidae	Diaphus sp	66.723	77.153	288.959
OP3CE2	BCCE	400 - 500	n	9.9162	9	MYCTO	Myctophidae	Diaphus sp	67.365	77.795	297.101
OP3CE2	BCCE	400 - 500	n	9.9162	9	MYCTO	Myctophidae	Diaphus sp	67.782	78.212	302.47
OP3CE2	BCCE	400 - 500	n	9.9162	9	MYCTO	Myctophidae	Diaphus sp	51.288	61.718	134.665
OP3CE2	BCCE	400 - 500	n	9.9162	9	MYCTO	Myctophidae	Diaphus sp	70.67	81.1	341.404
OP3CE2	BCCE	400 - 500	n	9.9162	9	MYCTO	Myctophidae	Diaphus sp	70.759	81.189	342.653
OP3CE2	BCCE	400 - 500	n	9.9162	9	MYCTO	Myctophidae	Diaphus sp	75.146	85.576	408.006
OP3CE2	BCCE	400 - 500	n	9.9162	9	MYCTO	Myctophidae	Diaphus sp	63.605	74.035	251.489
OP3CE2	BCCE	400 - 500	n	9.9162	9	MYCTO	Myctophidae	Diaphus sp	74.252	84.682	394.079
OP3CE2	BCCE	400 - 500	n	9.9162	9	MYCTO	Myctophidae	Diaphus sp	75.658	86.088	416.126
OP3CE2	BCCE	400 - 500	n	9.9162	9	MYCTO	Myctophidae	Diaphus sp	53.268	63.698	150.312
OP3CE2	BCCE	400 - 500	n	9.9162	9	MYCTO	Myctophidae	Diaphus sp	55.588	66.018	170.107
OP3CE2	BCCE	400 - 500	n	9.9162	9	MYCTO	Myctophidae	Diaphus sp	73.909	84.339	388.819
OP3CE2	BCCE	400 - 500	n	9.9162	9	MYCTO	Myctophidae	Diaphus sp	17.582	28.012	6.02526
OP3CE2	BCCE	400 - 500	n	9.9162	9	MYCTO	Myctophidae	Diaphus sp	78.249	88.679	458.842
OP3CE2	BCCE	400 - 500	n	9.9162	9	LCRUST	Decapod		3.818	21.056	4.76556
OP3CE2	BCCE	400 - 500	n	9.9162	9	LCRUST	Decapod		5.383	27.273	12.6943
OP3CE2	BCCE	400 - 500	n	9.9162	9	LCRUST	Decapod		7.057	31.666	22.3478
OP3CE2	BCCE	400 - 500	n	9.9162	9	LCRUST	Decapod		13.387	66.86	378.786
OP3CE2	BCCE	400 - 500	n	9.9162	9	LCRUST	Decapod		12.338	42.541	68.3572
OP3CE2	BCCE	400 - 500	n	9.9162	9	LCRUST	Decapod		14.778	51.433	140.269
OP3CE2	BCCE	400 - 500	n	9.9162	9	LCRUST	Decapod		8.513	25.908	10.4511
OP3CE2	BCCE	400 - 500	n	9.9162	9	LCRUST	Decapod		14.461	58.429	227.359
OP3CE2	BCCE	400 - 500	n	9.9162	9	LCRUST	Decapod		9.487	35.176	33.2755
OP3CE2	BCCE	400 - 500	n	9.9162	9	LCRUST	Decapod		8.362	20.022	3.9382
OP3CE2	BCCE	400 - 500	n	9.9162	9	HATCH	Sternoptychidae	Argyropelecus gigas	48.04	51.6	165.531
OP3CE2	BCCE	400 - 500	n	9.9162	9	HATCH	Sternoptychidae	Argyropelecus hemigymnus	20.8	25.8	14.01
OP3CE2	BCCE	400 - 500	n	9.9162	9	HATCH	Sternoptychidae	Argyropelecus hemigymnus	24.95	28.95	23.9612
OP3CE2	BCCE	400 - 500	n	9.9162	9	HATCH	Sternoptychidae	Argyropelecus hemigymnus	20.322	25.322	13.0813
OP3CE2	BCCE	400 - 500	n	9.9162	9	LCRUST	Decapod	Unidentified Species		67.996	403.742
OP3CE2	BCCE	400 - 500	n	9.9162	9	LCRUST	Decapod	Unidentified Species		64.197	324.749
OP3CE2	BCCE	400 - 500	n	9.9162	9	LCRUST	Decapod	Unidentified Species		63.114	304.485
OP3CE2	BCCE	400 - 500	n	9.9162	9	TOOTH	Evermannellidae	Evermannella indica	110.76	119.43	1.95908
OP3CE2	BCCE	400 - 500	n	9.9162	9	TOOTH	Evermannellidae	Odontosomops normalops	123.66	135	2.87144
OP3CE2	BCCE	400 - 500	n	9.9162	9	HATCH	Sternoptychidae	Polyipnus stereope	33.47	37.03	57.0014
OP3CE2	BCCE	400 - 500	n	9.9162	9	HATCH	Sternoptychidae	Polyipnus stereope	24.901	28.461	23.8227
OP3CE2	BCCE	400 - 500	n	9.9162	9	HATCH	Sternoptychidae	Polyipnus stereope	19.69	23.25	11.9173
OP3CE2	BCCE	400 - 500	n	9.9162	9	HATCH	Sternoptychidae	Polyipnus stereope	29.26	32.82	38.3407
OP3CE2	BCCE	400 - 500	n	9.9162	9	HATCH	Sternoptychidae	Polyipnus stereope	23.43	26.99	19.9058
OP3CE2	BCCE	400 - 500	n	9.9162	9	HATCH	Sternoptychidae	Polyipnus stereope	31.353	34.913	47.0083
OP3CE2	BCCE	400 - 500	n	9.9162	9	FISH	Melamphaidae	Scopelogadus mizolepis	74.12		332.035
OP3CE2	BCCE	400 - 500	n	9.9162	9	LCRUST	Decapod	Unidentified Species		49.476	121.105
OP6CE6	BCCE	0 - 100	n	19.6824	9	AMPHI	Amphipod		7.622	27.998	36.1962
OP3CE2	BCCE	400 - 500	n	9.9162	9	LCRUST	Decapod	Unidentified Species		47.897	107.107
OP3CE2	BCCE	400 - 500	n	9.9162	9	LCRUST	Decapod	Unidentified Species		37.427	42.0863
OP3CE2	BCCE	400 - 500	n	9.9162	9	LCRUST	Decapod	Unidentified Species		29.77	17.6884
OP3CE2	BCCE	400 - 500	n	9.9162	9	LCRUST	Decapod	Unidentified Species		29.23	16.5038
OP3CE2	BCCE	400 - 500	n	9.9162	9	LCRUST	Decapod	Unidentified Species		22.241	5.86358
OP3CE3	BCCE	300 - 400	n	11.762	9	MYCTO	Myctophidae	Diaphus sp	84.446	95.006	572.427
OP3CE3	BCCE	300 - 400	n	11.762	9	MYCTO	Myctophidae	Diaphus sp	81.353	91.913	513.679
OP3CE3	BCCE	300 - 400	n	11.762	9	MYCTO	Myctophidae	Diaphus sp	79.214	89.774	475.457
OP3CE3	BCCE	300 - 400	n	11.762	9	MYCTO	Myctophidae	Diaphus sp	79.1	89.66	473.474
OP3CE3	BCCE	300 - 400	n	11.762	9	MYCTO	Myctophidae	Diaphus sp	75.742	86.302	417.468
OP3CE3	BCCE	300 - 400	n	11.762	9	MYCTO	Myctophidae	Diaphus sp	70.847	81.407	343.891
OP3CE3	BCCE	300 - 400	n	11.762	9	MYCTO	Myctophidae	Diaphus sp	67.056	77.616	293.163
OP3CE3	BCCE	300 - 400	n	11.762	9	MYCTO	Myctophidae	Diaphus sp	73.437	83.997	381.657
OP3CE3	BCCE	300 - 400	n	11.762	9	MYCTO	Myctophidae	Diaphus sp	70.292	80.852	336.131
OP3CE3	BCCE	300 - 400	n	11.762	9	MYCTO	Myctophidae	Diaphus sp	63.212	73.772	247.006
OP3CE3	BCCE	300 - 400	n	11.762	9	MYCTO	Myctophidae	Diaphus sp	59.941	70.501	211.711
OP3CE3	BCCE	300 - 400	n	11.762	9	MYCTO	Myctophidae	Diaphus sp	62.591	73.151	240.03
OP3CE3	BCCE	300 - 400	n	11.762	9	MYCTO	Myctophidae	Diaphus sp	61.802	72.362	231.354
OP3CE3	BCCE	300 - 400	n	11.762	9	MYCTO	Myctophidae	Diaphus sp	60.675	71.235	219.322
OP3CE3	BCCE	300 - 400	n	11.762	9	MYCTO	Myctophidae	Diaphus sp	57.394	67.954	186.646
OP3CE3	BCCE	300 - 400	n	11.762	9	MYCTO	Myctophidae	Diaphus sp	57.661	68.221	189.177
OP3CE3	BCCE	300 - 400	n	11.762	9	MYCTO	Myctophidae	Diaphus sp	50.188	60.748	126.453
OP3CE3	BCCE	300 - 400	n	11.762	9	MYCTO	Myctophidae	Diaphus sp	51.03	61.59	132.708
OP3CE3	BCCE	300 - 400	n	11.762	9	MYCTO	Myctophidae	Diaphus sp	52.041	62.601	140.483
OP3CE3	BCCE	300 - 400	n	11.762	9	MYCTO	Myctophidae	Diaphus sp	50.84	61.4	131.279
OP3CE3	BCCE	300 - 400	n	11.762	9	MYCTO	Myctophidae	Diaphus sp	56.111	66.671	174.793
OP3CE3	BCCE	300 - 400	n	11.762	9	MYCTO	Myctophidae	Diaphus sp	43.139	53.699	81.5043
OP3CE3	BCCE	300 - 400	n	11.762	9	MYCTO	Myctophidae	Diaphus sp	41.556	52.116	73.1245
OP3CE3	BCCE	300 - 400	n	11.762	9	MYCTO	Myctophidae	Diaphus sp	30.263	40.823	29.1336
OP3CE3	BCCE	300 - 400	n	11.762	9	MYCTO	Myctophidae	Diaphus sp	16.585	27.145	5.0863
OP3CE3	BCCE	300 - 400	n	11.762	9	MYCTO	Myctophidae	Diaphus sp	61.64	72.2	229.599
OP3CE3	BCCE	300 - 400	n	11.762	9	MYCTO	Myctophidae	Diaphus sp	58.22	68.78	194.548
OP3CE3	BCCE	300 - 400	n	11.762	9	MYCTO	Myctophidae	Diaphus sp	56.828	67.388	181.354
OP3CE3	BCCE	300 - 400	n	11.762	9	MYCTO	Myctophidae	Diaphus sp	53.559	64.119	152.707
OP3CE3	BCCE	300 - 400	n	11.762	9	MYCTO	Myctophidae	Diaphus sp	55.445	66.005	168.84
OP3CE3	BCCE	300 - 400	n	11.762	9	MYCTO	Myctophidae	Diaphus sp	56.096	66.656	174.658
OP3CE3	BCCE	300 - 400	n	11.762	9	MYCTO	Myctophidae	Diaphus sp	56.765	67.325	180.771
OP3CE3	BCCE	300 - 400	n	11.762	9	MYCTO	Myctophidae	Diaphus sp	62.796	73.356	242.318
OP3CE3	BCCE	300 - 400	n	11.762	9	MYCTO	Myctophidae	Diaphus sp	66.705	77.265	288.732
OP3CE3	BCCE	300 - 400	n	11.762	9	MYCTO	Myctophidae	Diaphus sp	63.18	73.74	246.644
OP3CE3	BCCE	300 - 400	n	11.762	9	MYCTO	Myctophidae	Diaphus sp	65.2	75.76	270.23
OP3CE3	BCCE	300 - 400	n	11.762	9	MYCTO	Myctophidae	Diaphus sp	64.526	75.086	262.203
OP3CE3	BCCE	300 - 400	n	11.762	9	MYCTO	Myctophidae	Diaphus sp	54.989	65.549	164.842
OP3CE3	BCCE	300 - 400	n	11.762	9	MYCTO	Myctophidae	Diaphus sp	65.073	75.633	268.706
OP3CE3	BCCE	300 - 400	n	11.762	9	MYCTO	Myctophidae	Diaphus sp	67.988	78.548	305.145
OP3CE3	BCCE	300 - 400	n	11.762	9	MYCTO	Myctophidae	Diaphus sp	56.249	66.809	176.044
OP3CE3	BCCE	300 - 400	n	11.762	9	MYCTO	Myctophidae	Diaphus sp	67.681	78.241	301.164
OP3CE3	BCCE	300 - 400	n	11.762	9	MYCTO	Myctophidae	Diaphus sp	59.596	70.156	208.194
OP3CE3	BCCE	300 - 400	n	11.762	9	MYCTO	Myctophidae	Diaphus sp	64.636	75.196	263.503
OP3CE3	BCCE	300 - 400	n	11.762	9	MYCTO	Myctophidae	Diaphus sp	65.2	75.76	270.23
OP3CE3	BCCE	300 - 400	n	11.762	9	MYCTO	Myctophidae	Diaphus sp	75.216	85.776	409.11
OP3CE3	BCCE	300 - 400	n	11.762	9	MYCTO	Myctophidae	Diaphus sp	75.095	85.655	407.203
OP3CE3	BCCE	300 - 400	n	11.762	9	MYCTO	Myctophidae	Diaphus sp	69.168	79.728	320.769
OP3CE3	BCCE	300 - 400	n	11.762	9	MYCTO	Myctophidae	Diaphus sp	58.152	68.712	193.89
OP3CE3	BCCE	300 - 400	n	11.762	9	MYCTO	Myctophidae	Diaphus sp	59.105	69.665	203.255
OP3CE3	BCCE	300 - 400	n	11.762	9	MYCTO	Myctophidae	Diaphus sp	55.324	65.884	167.773
OP3CE3	BCCE	300 - 400	n	11.762	9	MYCTO	Myctophidae	Diaphus sp	67.81	78.37	302.832
OP3CE3	BCCE	300 - 400	n	11.762	9	NANNO	Myctophidae	Nannobrachium atrum	142.17	152.73	2595.59
OP3CE3	BCCE	300 - 400	n	11.762	9	NANNO	Myctophidae	Nannobrachium atrum	126.81	137.37	1862.68
OP3CE3	BCCE	300 - 400	n	11.762	9	NANNO	Myctophidae	Nannobrachium atrum	108.357	118.917	1180.17
OP3CE3	BCCE	300 - 400	n	11.762	9	NANNO	Myctophidae	Nannobrachium atrum	97.5	108.06	868.719
OP3CE3	BCCE	300 - 400	n	11.762	9	NANNO	Myctophidae	Nannobrachium atrum	98.69	109.25	899.847
OP3CE3	BCCE	300 - 400	n	11.762	9	NANNO	Myctophidae	Nannobrachium atrum	98.88	109.44	904.883
OP3CE3	BCCE	300 - 400	n	11.762	9	NANNO	Myctophidae	Nannobrachium atrum	83.85	94.41	560.782
OP3CE3	BCCE	300 - 400	n	11.762	9	NANNO	Myctophidae	Nannobrachium atrum	95.51	106.07	818.257
OP3CE3	BCCE	300 - 400	n	11.762	9	NANNO	Myctophidae	Nannobrachium atrum	86.739	97.299	618.708
OP3CE3	BCCE	300 - 400	n	11.762	9	NANNO	Myctophidae	Nannobrachium atrum	87.18	97.74	627.881
OP3CE3	BCCE	300 - 400	n	11.762	9	NANNO	Myctophidae	Nannobrachium atrum	79.4	89.96	478.704
OP3CE3	BCCE	300 - 400	n	11.762	9	NANNO	Myctophidae	Nannobrachium atrum	80.25	90.81	493.728
OP3CE3	BCCE	300 - 400	n	11.762	9	NANNO	Myctophidae	Nannobrachium atrum	79.52	90.08	480.806
OP3CE3	BCCE	300 - 400	n	11.762	9	NANNO	Myctophidae	Nannobrachium atrum	65.65	76.21	275.679
OP3CE3	BCCE	300 - 400	n	11.762	9	NANNO	Myctophidae	Nannobrachium atrum	62.64	73.2	240.576
OP3CE3	BCCE	300 - 400	n	11.762	9	NANNO	Myctophidae	Nannobrachium atrum	69.42	79.98	324.172
OP3CE3	BCCE	300 - 400	n	11.762	9	NANNO	Myctophidae	Nannobrachium atrum	64.68	75.24	264.023
OP3CE3	BCCE	300 - 400	n	11.762	9	NANNO	Myctophidae	Nannobrachium atrum	74.48	85.04	397.601
OP3CE3	BCCE	300 - 400	n	11.762	9	NANNO	Myctophidae	Nannobrachium atrum	75.479	86.039	413.275
OP3CE3	BCCE	300 - 400	n	11.762	9	NANNO	Myctophidae	Nannobrachium atrum	66	76.56	279.965
OP3CE3	BCCE	300 - 400	n	11.762	9	NANNO	Myctophidae	Nannobrachium atrum	68.4	78.96	310.542
OP3CE3	BCCE	300 - 400	n	11.762	9	NANNO	Myctophidae	Nannobrachium atrum	65.87	76.43	278.368
OP3CE3	BCCE	300 - 400	n	11.762	9	LCRUST	Decapod		11.108	27.758	13.5706
OP3CE3	BCCE	300 - 400	n	11.762	9	LCRUST	Decapod		7.932	26.262	11.0023
OP3CE3	BCCE	300 - 400	n	11.762	9	LCRUST	Decapod		10.122	36.893	39.8571
OP3CE3	BCCE	300 - 400	n	11.762	9	LCRUST	Decapod		6.202	20.134	4.02228
OP3CE3	BCCE	300 - 400	n	11.762	9	LCRUST	Decapod		8.687	28.927	15.8652
OP3CE3	BCCE	300 - 400	n	11.762	9	LCRUST	Decapod		9.487	37.953	44.3705
OP3CE3	BCCE	300 - 400	n	11.762	9	LCRUST	Decapod		7.616	32.221	23.8678
OP3CE3	BCCE	300 - 400	n	11.762	9	LCRUST	Decapod		16.939	62.932	301.173
OP3CE3	BCCE	300 - 400	n	11.762	9	LCRUST	Decapod		7.343	25.18	9.38182
OP3CE3	BCCE	300 - 400	n	11.762	9	LCRUST	Decapod		13.692	48.65	113.625
OP3CE3	BCCE	300 - 400	n	11.762	9	LCRUST	Decapod		7.706	35.629	34.9277
OP3CE3	BCCE	300 - 400	n	11.762	9	LCRUST	Decapod		5.851	23.203	6.88343
OP3CE3	BCCE	300 - 400	n	11.762	9	LCRUST	Decapod		8.709	26.691	11.6986
OP3CE3	BCCE	300 - 400	n	11.762	9	LCRUST	Decapod		9.531	25.703	10.1414
OP3CE3	BCCE	300 - 400	n	11.762	9	LCRUST	Decapod		7.328	32.112	23.5634
OP3CE3	BCCE	300 - 400	n	11.762	9	LCRUST	Decapod		8.602	31.508	21.9285
OP3CE3	BCCE	300 - 400	n	11.762	9	LCRUST	Decapod		13.658	54.471	174.32
OP3CE3	BCCE	300 - 400	n	11.762	9	LCRUST	Decapod		14.655	50.616	132.016
OP3CE3	BCCE	300 - 400	n	11.762	9	LCRUST	Decapod		10.77	27.537	13.166
OP3CE3	BCCE	300 - 400	n	11.762	9	LCRUST	Decapod		7.28	24.553	8.52737
OP3CE3	BCCE	300 - 400	n	11.762	9	LCRUST	Decapod		8.616	25.661	10.0788
OP3CE3	BCCE	300 - 400	n	11.762	9	LCRUST	Decapod		8.862	37.345	41.7382
OP3CE3	BCCE	300 - 400	n	11.762	9	LCRUST	Decapod		6.385	21.004	4.72114
OP3CE3	BCCE	300 - 400	n	11.762	9	LCRUST	Decapod		14.987	60.736	263.269
OP3CE3	BCCE	300 - 400	n	11.762	9	LCRUST	Decapod		15.811	57.545	214.604
OP3CE3	BCCE	300 - 400	n	11.762	9	LCRUST	Decapod		15.831	59.613	245.305
OP3CE3	BCCE	300 - 400	n	11.762	9	LCRUST	Decapod		12.254	58.841	233.49
OP3CE3	BCCE	300 - 400	n	11.762	9	LCRUST	Decapod		24.314	70.102	453.18
OP3CE3	BCCE	300 - 400	n	11.762	9	LCRUST	Decapod		21.372	69.193	431.325
OP3CE3	BCCE	300 - 400	n	11.762	9	LCRUST	Decapod		6.799	25.95	10.5154
OP3CE3	BCCE	300 - 400	n	11.762	9	LCRUST	Decapod		8.669	26.582	11.5187
OP3CE3	BCCE	300 - 400	n	11.762	9	LCRUST	Decapod		9.303	26.296	11.0563
OP3CE3	BCCE	300 - 400	n	11.762	9	LCRUST	Decapod		7.468	23.831	7.616
OP3CE3	BCCE	300 - 400	n	11.762	9	LCRUST	Decapod		11.783	32.706	25.2571
OP3CE3	BCCE	300 - 400	n	11.762	9	TOOTH	Anoplogastridae	Anoplogaster cornuta	24.3	26.86	0.3291
OP3CE3	BCCE	300 - 400	n	11.762	9	HATCH	Sternoptychidae	Argyropelecus hemigymnus	21.7	25.26	15.8748
OP3CE3	BCCE	300 - 400	n	11.762	9	HATCH	Sternoptychidae	Argyropelecus olfersii	64.585	70.145	396.314
OP3CE3	BCCE	300 - 400	n	11.762	9	FISH	Phosichthyidae	Vinciguerria poweriae	23.42	27.59	10.9028
OP3CE3	BCCE	300 - 400	n	11.762	9	FISH	Phosichthyidae	Ichthyococcus australis	18.8	29.23	4.49143
OP3CE3	BCCE	300 - 400	n	11.762	9	HATCH	Sternoptychidae	Polyipnus stereope	17.72	28.15	8.73211
OP3CE3	BCCE	300 - 400	n	11.762	9	SLEND	Gonostomatidae	Sigmops elongatus	47.453	47.453	0.0239261
OP3CE3	BCCE	300 - 400	n	11.762	9	FISH	Phosichthyidae	Ichthyococcus australis	25.33	35.76	14.9608
OP3CE3	BCCE	300 - 400	n	11.762	9	FISH	Phosichthyidae	Ichthyococcus australis	27.5	37.93	20.8464
OP3CE3	BCCE	300 - 400	n	11.762	9	FISH	Melamphaidae	Melamphaes simus	34.068	44.628	26.3622
OP3CE3	BCCE	300 - 400	n	11.762	9	FISH	Melamphaidae	Melamphaes simus	35.309	45.869	29.6226
OP3CE3	BCCE	300 - 400	n	11.762	9	FISH	Melamphaidae	Melamphaes simus	36.234	46.794	32.2273
OP3CE3	BCCE	300 - 400	n	11.762	9	SLEND	Paralepididae	Magnisudis Prionosa	72.865	74.2	35.1885
OP3CE3	BCCE	300 - 400	n	11.762	9	LGFISH	Bathylagidae	Melanolagus bericoides	74.48	85.04	0.632822
OP3CE3	BCCE	300 - 400	n	11.762	9	SLEND	Paralepididae	Magnisudis Prionosa	87.76	91.23	59.5001
OP3CE3	BCCE	300 - 400	n	11.762	9	SLEND	Paralepididae	Magnisudis Prionosa	89.541	93.46	62.9735
OP6CE6	BCCE	0 - 100	n	19.6824	9	AMPHI	Amphipod		8.567	29.302	40.9618
OP3CE4	BCCE	200 - 300	n	13.9728	9	LCRUST	Decapod		10.621	40.233	55.3405
OP3CE4	BCCE	200 - 300	n	13.9728	9	LCRUST	Decapod		8.021	22.811	6.4533
OP3CE4	BCCE	200 - 300	n	13.9728	9	LCRUST	Decapod		7.475	28.949	15.9109
OP3CE4	BCCE	200 - 300	n	13.9728	9	LCRUST	Decapod		7.843	28.75	15.5007
OP3CE4	BCCE	200 - 300	n	13.9728	9	LCRUST	Decapod		6.387	22.177	5.79994
OP3CE4	BCCE	200 - 300	n	13.9728	9	LCRUST	Decapod		9.085	24.475	8.42524
OP3CE4	BCCE	200 - 300	n	13.9728	9	LCRUST	Decapod		12.135	23.196	6.87557
OP3CE4	BCCE	200 - 300	n	13.9728	9	LCRUST	Decapod		12.031	45.031	84.7886
OP3CE4	BCCE	200 - 300	n	13.9728	9	LCRUST	Decapod		19.002	56.689	202.763
OP3CE4	BCCE	200 - 300	n	13.9728	9	LCRUST	Decapod		7.608	27.529	13.1515
OP3CE4	BCCE	200 - 300	n	13.9728	9	LCRUST	Decapod		7.7	24.659	8.66763
OP3CE4	BCCE	200 - 300	n	13.9728	9	LCRUST	Decapod		11.421	41.623	62.9368
OP3CE4	BCCE	200 - 300	n	13.9728	9	LCRUST	Decapod		9.995	31.137	20.9666
OP3CE4	BCCE	200 - 300	n	13.9728	9	LCRUST	Decapod		8.315	30.707	19.891
OP3CE4	BCCE	200 - 300	n	13.9728	9	LCRUST	Decapod		9.655	32.66	25.1228
OP3CE4	BCCE	200 - 300	n	13.9728	9	LCRUST	Decapod		8.904	24.845	8.91783
OP3CE4	BCCE	200 - 300	n	13.9728	9	LCRUST	Decapod		8.126	23.651	7.40044
OP3CE4	BCCE	200 - 300	n	13.9728	9	LCRUST	Decapod		8.759	30.844	20.2292
OP3CE4	BCCE	200 - 300	n	13.9728	9	LCRUST	Decapod		8.334	29.951	18.0992
OP3CE4	BCCE	200 - 300	n	13.9728	9	LCRUST	Decapod		5.83	22.042	5.66736
OP3CE4	BCCE	200 - 300	n	13.9728	9	LCRUST	Decapod		20.077	70.769	469.726
OP3CE4	BCCE	200 - 300	n	13.9728	9	LCRUST	Decapod		18.085	55.272	184.228
OP3CE4	BCCE	200 - 300	n	13.9728	9	LCRUST	Decapod		7.924	35.75	35.379
OP3CE4	BCCE	200 - 300	n	13.9728	9	LCRUST	Decapod		10.636	33.557	27.8375
OP3CE4	BCCE	200 - 300	n	13.9728	9	LCRUST	Decapod		18.78	49.29	119.39
OP3CE4	BCCE	200 - 300	n	13.9728	9	LCRUST	Decapod	Unidentified Species		83.02	859.873
OP3CE4	BCCE	200 - 300	n	13.9728	9	LCRUST	Decapod	Unidentified Species		71.291	482.983
OP3CE4	BCCE	200 - 300	n	13.9728	9	LCRUST	Decapod	Unidentified Species		66.114	363.028
OP3CE4	BCCE	200 - 300	n	13.9728	9	LCRUST	Decapod	Unidentified Species		65.092	342.23
OP3CE4	BCCE	200 - 300	n	13.9728	9	TOOTH	Stomiidae	Flagellastomias baureei	207		805.384
OP3CE4	BCCE	200 - 300	n	13.9728	9	LEPTO	Leptocephalus	Unidentified Species	30.2254	32.482	0.630863
OP3CE4	BCCE	200 - 300	n	13.9728	9	LEPTO	Leptocephalus	Unidentified Species	65.4345	68.162	2.6475
OP3CE4	BCCE	200 - 300	n	13.9728	9	LEPTO	Leptocephalus	Unidentified Species	40.7753	43.173	1.1
OP3CE4	BCCE	200 - 300	n	13.9728	9	LEPTO	Leptocephalus	Unidentified Species	21.6314	23.773	0.33895
OP3CE4	BCCE	200 - 300	n	13.9728	9	LEPTO	Leptocephalus	Unidentified Species	190.802	195.207	19.3165
OP3CE4	BCCE	200 - 300	n	13.9728	9	LEPTO	Leptocephalus	Unidentified Species	62.0882	64.771	2.4016
OP3CE4	BCCE	200 - 300	n	13.9728	9	LEPTO	Leptocephalus	Unidentified Species	180.212	184.475	17.373
OP3CE4	BCCE	200 - 300	n	13.9728	9	LEPTO	Leptocephalus	Unidentified Species	108.678	111.984	6.79201
OP3CE4	BCCE	200 - 300	n	13.9728	9	LEPTO	Leptocephalus	Unidentified Species	97.4403	100.596	5.54589
OP3CE4	BCCE	200 - 300	n	13.9728	9	LEPTO	Leptocephalus	Unidentified Species	94.5016	97.618	5.23931
OP3CE4	BCCE	200 - 300	n	13.9728	9	LEPTO	Leptocephalus	Unidentified Species	162.95	166.982	14.4102
OP6CE6	BCCE	0 - 100	n	19.6824	9	AMPHI	Amphipod		11.055	30.495	45.6529
OP6CE6	BCCE	0 - 100	n	19.6824	9	AMPHI	Amphipod		14.357	34.529	63.9831
OP6CE6	BCCE	0 - 100	n	19.6824	9	AMPHI	Amphipod		8.57	28.597	38.3391
OP6CE6	BCCE	0 - 100	n	19.6824	9	AMPHI	Amphipod		11.113	28.641	38.4996
OP6CE6	BCCE	0 - 100	n	19.6824	9	AMPHI	Amphipod		9.333	29.532	41.8413
OP6CE6	BCCE	0 - 100	n	19.6824	9	AMPHI	Amphipod		7.443	25.127	26.9775
OP6CE6	BCCE	0 - 100	n	19.6824	9	AMPHI	Amphipod		7.213	32.098	52.471
OP6CE6	BCCE	0 - 100	n	19.6824	9	AMPHI	Amphipod		7.768	30.328	44.9768
OP6CE6	BCCE	0 - 100	n	19.6824	9	AMPHI	Amphipod		9.061	30.832	47.0367
OP6CE6	BCCE	0 - 100	n	19.6824	9	AMPHI	Amphipod		9.318	31.467	49.7155
OP6CE6	BCCE	0 - 100	n	19.6824	9	AMPHI	Amphipod		7.648	33.556	59.202
OP6CE6	BCCE	0 - 100	n	19.6824	9	AMPHI	Amphipod		9.382	30.802	46.9124
OP6CE6	BCCE	0 - 100	n	19.6824	9	AMPHI	Amphipod		5.265	31.504	49.8745
OP6CE6	BCCE	0 - 100	n	19.6824	9	AMPHI	Amphipod		6.708	33.404	58.4763
OP6CE6	BCCE	0 - 100	n	19.6824	9	AMPHI	Amphipod		5.031	25.322	27.5501
OP6CE6	BCCE	0 - 100	n	19.6824	9	AMPHI	Amphipod		6.783	24.695	25.7358
OP10CE5	RWCE	100 - 200	d	19.7971	11.5	AMPHI	Amphipod		8.439	31.345	49.1936
OP10CE5	RWCE	100 - 200	d	19.7971	11.5	AMPHI	Amphipod		13.926	32.061	52.3069
OP10CE5	RWCE	100 - 200	d	19.7971	11.5	AMPHI	Amphipod		8.328	21.929	18.6366
OP10CE5	RWCE	100 - 200	d	19.7971	11.5	AMPHI	Amphipod		7.039	23.881	23.4957
OP10CE5	RWCE	100 - 200	d	19.7971	11.5	AMPHI	Amphipod		5.269	26.132	30.0108
OP3CE4	BCCE	200 - 300	n	13.9728	9	LCRUST	Decapod	Unidentified Species		46.099	92.6593
OP3CE4	BCCE	200 - 300	n	13.9728	9	LCRUST	Decapod	Unidentified Species		45.982	91.7718
OP3CE4	BCCE	200 - 300	n	13.9728	9	LCRUST	Decapod	Unidentified Species		43.744	75.971
OP3CE4	BCCE	200 - 300	n	13.9728	9	LCRUST	Decapod	Unidentified Species		35.109	33.0361
OP3CE4	BCCE	200 - 300	n	13.9728	9	LCRUST	Decapod	Unidentified Species		32.997	26.1187
OP3CE4	BCCE	200 - 300	n	13.9728	9	LCRUST	Decapod	Unidentified Species		32.656	25.1112
OP3CE4	BCCE	200 - 300	n	13.9728	9	LCRUST	Decapod	Unidentified Species		32.363	24.2686
OP3CE4	BCCE	200 - 300	n	13.9728	9	LCRUST	Decapod	Unidentified Species		32.157	23.6887
OP3CE4	BCCE	200 - 300	n	13.9728	9	LCRUST	Decapod	Unidentified Species		31.935	23.0753
OP3CE4	BCCE	200 - 300	n	13.9728	9	LCRUST	Decapod	Unidentified Species		31.748	22.5678
OP3CE4	BCCE	200 - 300	n	13.9728	9	LCRUST	Decapod	Unidentified Species		31.272	21.313
OP3CE4	BCCE	200 - 300	n	13.9728	9	LCRUST	Decapod	Unidentified Species		31.15	20.9998
OP3CE4	BCCE	200 - 300	n	13.9728	9	LCRUST	Decapod	Unidentified Species		30.811	20.1474
OP3CE4	BCCE	200 - 300	n	13.9728	9	LCRUST	Decapod	Unidentified Species		29.138	16.3079
OP3CE4	BCCE	200 - 300	n	13.9728	9	LCRUST	Decapod	Unidentified Species		28.249	14.5023
OP3CE4	BCCE	200 - 300	n	13.9728	9	LCRUST	Decapod	Unidentified Species		26.667	11.6588
OP3CE4	BCCE	200 - 300	n	13.9728	9	LCRUST	Decapod	Unidentified Species		26.495	11.3766
OP3CE4	BCCE	200 - 300	n	13.9728	9	LCRUST	Decapod	Unidentified Species		25.632	10.0357
OP3CE4	BCCE	200 - 300	n	13.9728	9	LCRUST	Decapod	Unidentified Species		25.352	9.62684
OP3CE4	BCCE	200 - 300	n	13.9728	9	LCRUST	Decapod	Unidentified Species		24.474	8.42393
OP3CE4	BCCE	200 - 300	n	13.9728	9	LCRUST	Decapod	Unidentified Species		22.309	5.93176
OP3CE4	BCCE	200 - 300	n	13.9728	9	LCRUST	Decapod	Unidentified Species		22.014	5.64014
OP3CE4	BCCE	200 - 300	n	13.9728	9	LCRUST	Decapod	Unidentified Species		21.768	5.40515
OP3CE4	BCCE	200 - 300	n	13.9728	9	LCRUST	Decapod	Unidentified Species		21.531	5.18565
OP3CE4	BCCE	200 - 300	n	13.9728	9	LCRUST	Decapod	Unidentified Species		21.412	5.07795
OP3CE4	BCCE	200 - 300	n	13.9728	9	LCRUST	Decapod	Unidentified Species		20.285	4.13772
OP3CE4	BCCE	200 - 300	n	13.9728	9	LCRUST	Decapod	Unidentified Species		20.055	3.96284
OP3CE4	BCCE	200 - 300	n	13.9728	9	HATCH	Sternoptychidae	Argyropelecus aculeatus	41.599	54.746	108.254
OP3CE4	BCCE	200 - 300	n	13.9728	9	HATCH	Sternoptychidae	Argyropelecus aculeatus	42.475	32.682	115.118
OP3CE4	BCCE	200 - 300	n	13.9728	9	HATCH	Sternoptychidae	Argyropelecus aculeatus	45.552	46.823	141.497
OP3CE4	BCCE	200 - 300	n	13.9728	9	HATCH	Sternoptychidae	Argyropelecus aculeatus	49.164	50.011	177.219
OP3CE4	BCCE	200 - 300	n	13.9728	9	HATCH	Sternoptychidae	Argyropelecus aculeatus	27.207	54.263	30.9356
OP3CE4	BCCE	200 - 300	n	13.9728	9	HATCH	Sternoptychidae	Argyropelecus aculeatus	43.025	56.577	119.572
OP3CE4	BCCE	200 - 300	n	13.9728	9	HATCH	Sternoptychidae	Argyropelecus aculeatus	29.269	60.39	38.3755
OP3CE4	BCCE	200 - 300	n	13.9728	9	HATCH	Sternoptychidae	Argyropelecus aculeatus	43.964	34.659	127.435
OP3CE4	BCCE	200 - 300	n	13.9728	9	HATCH	Sternoptychidae	Argyropelecus aculeatus	26.994	33.5716	30.2266
OP3CE4	BCCE	200 - 300	n	13.9728	9	HATCH	Sternoptychidae	Argyropelecus hemigymnus	20.421	22.608	13.2702
OP3CE4	BCCE	200 - 300	n	13.9728	9	FISH	Macroramphosidae	Macroramphosus scolopax	19.029	20.834	0.0329732
OP3CE4	BCCE	200 - 300	n	13.9728	9	SLEND	Paralepididae	Paralepididae	80.434		46.5167
OP3CE4	BCCE	200 - 300	n	13.9728	9	SLEND	Paralepididae	Paralepididae	98.75		83.0272
OP3CE4	BCCE	200 - 300	n	13.9728	9	SLEND	Paralepididae	Paralepididae	67.525		28.3828
OP3CE4	BCCE	200 - 300	n	13.9728	9	SLEND	Paralepididae	Paralepididae	62.345		22.6552
OP3CE4	BCCE	200 - 300	n	13.9728	9	FISH	Macroramphosidae	Macroramphosus scolopax	28.74	30.012	0.0754553
OP3CE4	BCCE	200 - 300	n	13.9728	9	HATCH	Sternoptychidae	Polyipnus stereope	24.89	24.184	23.7917
OP3CE4	BCCE	200 - 300	n	13.9728	9	HATCH	Sternoptychidae	Polyipnus stereope	29.775	33.184	40.3658
OP3CE4	BCCE	200 - 300	n	13.9728	9	SCOPE	Myctophidae	Scopelopsis multipunctatus	29.275	33.657	26.4583
OP3CE4	BCCE	200 - 300	n	13.9728	9	SCOPE	Myctophidae	Scopelopsis multipunctatus	58.612	68.938	198.374
OP3CE4	BCCE	200 - 300	n	13.9728	9	SCOPE	Myctophidae	Scopelopsis multipunctatus	60.675	73.443	219.322
OP3CE4	BCCE	200 - 300	n	13.9728	9	SCOPE	Myctophidae	Scopelopsis multipunctatus	57.886	67.648	191.327
OP3CE4	BCCE	200 - 300	n	13.9728	9	SCOPE	Myctophidae	Scopelopsis multipunctatus	40.544	48.444	68.0755
OP3CE4	BCCE	200 - 300	n	13.9728	9	SCOPE	Myctophidae	Scopelopsis multipunctatus	60.26	73.474	214.997
OP3CE4	BCCE	200 - 300	n	13.9728	9	SCOPE	Myctophidae	Scopelopsis multipunctatus	35.108	38.748	44.8287
OP3CE4	BCCE	200 - 300	n	13.9728	9	SLEND	Gonostomatidae	Sigmops elongatus	44.669	51.196	0.0200237
OP3CE4	BCCE	200 - 300	n	13.9728	9	SLEND	Gonostomatidae	Sigmops elongatus	46.992	53.275	0.023248
OP3CE4	BCCE	200 - 300	n	13.9728	9	SLEND	Gonostomatidae	Sigmops elongatus	48.114	54.362	0.024921
OP3CE4	BCCE	200 - 300	n	13.9728	9	SLEND	Gonostomatidae	Sigmops elongatus	30.233		0.00634298
OP3CE4	BCCE	200 - 300	n	13.9728	9	SLEND	Gonostomatidae	Sigmops elongatus	24.564	27.33	0.00344117
OP3CE4	BCCE	200 - 300	n	13.9728	9	SLEND	Gonostomatidae	Sigmops elongatus	47.72	52.236	0.0243248
OP3CE4	BCCE	200 - 300	n	13.9728	9	SLEND	Gonostomatidae	Sigmops elongatus	52.478	59.928	0.0321817
OP3CE4	BCCE	200 - 300	n	13.9728	9	FISH	Macroramphosidae	Macroramphosus scolopax	28.182	31.56	0.0845721
OP3CE4	BCCE	200 - 300	n	13.9728	9	DBFISH	Grammicolepididae	Xenolepidichthys dalgleishi	33.829	41.547	0.301003
OP3CE4	BCCE	200 - 300	n	13.9728	9	MYCTO	Myctophidae	Diaphus brachycephalus	40.947	45.608	70.0578
OP3CE4	BCCE	200 - 300	n	13.9728	9	MYCTO	Myctophidae	Diaphus brachycephalus	44.539	48.983	89.4196
OP3CE4	BCCE	200 - 300	n	13.9728	9	MYCTO	Myctophidae	Diaphus brachycephalus	40.177	43.701	66.3026
OP3CE4	BCCE	200 - 300	n	13.9728	9	MYCTO	Myctophidae	Diaphus brachycephalus	45.22	49.044	93.4452
OP3CE4	BCCE	200 - 300	n	13.9728	9	MYCTO	Myctophidae	Diaphus brachycephalus	45.832	45.832	97.1627
OP3CE4	BCCE	200 - 300	n	13.9728	9	MYCTO	Myctophidae	Diaphus brachycephalus	40.733	49.555	69.0005
OP3CE4	BCCE	200 - 300	n	13.9728	9	MYCTO	Myctophidae	Diaphus brachycephalus	43.671	48.735	84.4556
OP3CE4	BCCE	200 - 300	n	13.9728	9	MYCTO	Myctophidae	Diaphus sp	41.275	47.716	71.6988
OP3CE4	BCCE	200 - 300	n	13.9728	9	MYCTO	Myctophidae	Diaphus sp	37.118	42.044	52.6893
OP3CE4	BCCE	200 - 300	n	13.9728	9	MYCTO	Myctophidae	Diaphus sp	24.631	28.717	16.0276
OP3CE4	BCCE	200 - 300	n	13.9728	9	MYCTO	Myctophidae	Diaphus sp	54.442	62.942	160.128
OP3CE4	BCCE	200 - 300	n	13.9728	9	MYCTO	Myctophidae	Diaphus sp	26.503		19.8239
OP3CE4	BCCE	200 - 300	n	13.9728	9	MYCTO	Myctophidae	Diaphus sp	34.716	39.214	43.3915
OP3CE4	BCCE	200 - 300	n	13.9728	9	MYCTO	Myctophidae	Diaphus sp	47.763	52.759	109.525
OP3CE4	BCCE	200 - 300	n	13.9728	9	MYCTO	Myctophidae	Diaphus sp	26.167	26.167	19.1034
OP3CE4	BCCE	200 - 300	n	13.9728	9	MYCTO	Myctophidae	Diaphus sp	44.417	52.385	88.7106
OP3CE4	BCCE	200 - 300	n	13.9728	9	MYCTO	Myctophidae	Diaphus sp	28.167	30.116	23.6557
OP3CE4	BCCE	200 - 300	n	13.9728	9	MYCTO	Myctophidae	Diaphus sp	42.089	48.955	75.8796
OP3CE4	BCCE	200 - 300	n	13.9728	9	MYCTO	Myctophidae	Diaphus sp	56.785	62.647	180.956
OP3CE4	BCCE	200 - 300	n	13.9728	9	MYCTO	Myctophidae	Diaphus sp	44.378	52.006	88.4848
OP3CE4	BCCE	200 - 300	n	13.9728	9	MYCTO	Myctophidae	Diaphus sp	37.027	41.466	52.3153
OP3CE4	BCCE	200 - 300	n	13.9728	9	MYCTO	Myctophidae	Diaphus sp	40.662	46.201	68.6521
OP3CE4	BCCE	200 - 300	n	13.9728	9	MYCTO	Myctophidae	Diaphus sp	42.236	49.348	76.6513
OP3CE4	BCCE	200 - 300	n	13.9728	9	MYCTO	Myctophidae	Diaphus sp	28.724		25.0389
OP3CE4	BCCE	200 - 300	n	13.9728	9	MYCTO	Myctophidae	Diaphus sp	27.046		21.0257
OP3CE4	BCCE	200 - 300	n	13.9728	9	MYCTO	Myctophidae	Diaphus sp	37.927	44.982	56.0914
OP3CE4	BCCE	200 - 300	n	13.9728	9	MYCTO	Myctophidae	Diaphus sp	45.558	52.257	95.4866
OP3CE4	BCCE	200 - 300	n	13.9728	9	MYCTO	Myctophidae	Diaphus sp	67.874	75.831	303.663
OP3CE4	BCCE	200 - 300	n	13.9728	9	MYCTO	Myctophidae	Diaphus sp	40.573		68.2169
OP3CE4	BCCE	200 - 300	n	13.9728	9	MYCTO	Myctophidae	Diaphus sp	72.229		363.721
OP3CE4	BCCE	200 - 300	n	13.9728	9	MYCTO	Myctophidae	Diaphus sp	35.715		47.1151
OP3CE4	BCCE	200 - 300	n	13.9728	9	MYCTO	Myctophidae	Diaphus sp	71.303		350.354
OP3CE4	BCCE	200 - 300	n	13.9728	9	MYCTO	Myctophidae	Diaphus sp	61.661		229.826
OP3CE4	BCCE	200 - 300	n	13.9728	9	MYCTO	Myctophidae	Diaphus sp	58.459		196.875
OP3CE4	BCCE	200 - 300	n	13.9728	9	MYCTO	Myctophidae	Lampadena sp	30.91	33.671	30.9781
OP3CE4	BCCE	200 - 300	n	13.9728	9	MYCTO	Myctophidae	Lampadena sp	41.492	47.768	72.7982
OP3CE4	BCCE	200 - 300	n	13.9728	9	MYCTO	Myctophidae	Lampadena sp	27.768	30.734	22.6963
OP3CE4	BCCE	200 - 300	n	13.9728	9	MYCTO	Myctophidae	Lampadena sp	28.196	28.196	23.7264
OP3CE4	BCCE	200 - 300	n	13.9728	9	MYCTO	Myctophidae	Lampadena sp	50.133	54.741	126.051
OP3CE4	BCCE	200 - 300	n	13.9728	9	MYCTO	Myctophidae	Lampadena sp	27.743	33.439	22.637
OP3CE4	BCCE	200 - 300	n	13.9728	9	MYCTO	Myctophidae	Lampadena sp	22.527	25.636	12.369
OP3CE4	BCCE	200 - 300	n	13.9728	9	MYCTO	Myctophidae	Lampadena sp	23.03	28.325	13.1876
OP3CE4	BCCE	200 - 300	n	13.9728	9	MYCTO	Myctophidae	Lampadena sp	27.204	29.912	21.3842
OP3CE4	BCCE	200 - 300	n	13.9728	9	MYCTO	Myctophidae	Lampadena sp	27.814	27.814	22.8055
OP3CE4	BCCE	200 - 300	n	13.9728	9	MYCTO	Myctophidae	Lampadena sp	33.095	39.025	37.7692
OP3CE4	BCCE	200 - 300	n	13.9728	9	MYCTO	Myctophidae	Lampadena sp	33.85	37.562	40.3243
OP3CE4	BCCE	200 - 300	n	13.9728	9	MYCTO	Myctophidae	Lampadena sp	45.438	53.993	94.7585
OP3CE4	BCCE	200 - 300	n	13.9728	9	FISH	Phosichthyidae	Vinciguerria poweriae	27.343	29.549	20.3702
OP3CE4	BCCE	200 - 300	n	13.9728	9	FISH	Phosichthyidae	Vinciguerria poweriae	29.115	33.21	26.2457
OP3CE4	BCCE	200 - 300	n	13.9728	9	FISH	Phosichthyidae	Vinciguerria poweriae	32.95	36.373	43.2462
OP3CE4	BCCE	200 - 300	n	13.9728	9	FISH	Phosichthyidae	Vinciguerria poweriae	35.039	39.646	55.4235
OP3CE4	BCCE	200 - 300	n	13.9728	9	FISH	Phosichthyidae	Vinciguerria poweriae	35.267	41.893	56.8935
OP3CE4	BCCE	200 - 300	n	13.9728	9	FISH	Phosichthyidae	Vinciguerria poweriae	38.064	44.827	77.4176
OP10CE5	RWCE	100 - 200	d	19.7971	11.5	AMPHI	Amphipod		8.535	32.924	56.2213
OP10CE5	RWCE	100 - 200	d	19.7971	11.5	AMPHI	Amphipod		8.528	21.492	17.6447
OP3CE5	BCCE	100 - 200	n	16.5273	9	AMPHI	Phronimidae		8.606	20.735	16.0068
OP3CE5	BCCE	100 - 200	n	16.5273	9	AMPHI	Phronimidae		8.568	21.139	16.8684
OP3CE5	BCCE	100 - 200	n	16.5273	9	AMPHI	Phronimidae		9.535	32.714	55.2523
OP3CE5	BCCE	100 - 200	n	16.5273	9	LCRUST	Decapod		5.548	23.353	7.05347
OP3CE5	BCCE	100 - 200	n	16.5273	9	LCRUST	Decapod		6.192	20.683	4.45367
OP3CE5	BCCE	100 - 200	n	16.5273	9	LCRUST	Decapod		5.553	20.658	4.43331
OP3CE5	BCCE	100 - 200	n	16.5273	9	LCRUST	Decapod		9.644	25.728	10.1788
OP3CE5	BCCE	100 - 200	n	16.5273	9	LCRUST	Decapod		8.372	24.895	8.98599
OP3CE5	BCCE	100 - 200	n	16.5273	9	LCRUST	Decapod		8.095	23.657	7.40755
OP3CE5	BCCE	100 - 200	n	16.5273	9	LCRUST	Decapod		7.711	23.311	7.00555
OP3CE5	BCCE	100 - 200	n	16.5273	9	LCRUST	Decapod		8.662	35.076	32.9187
OP3CE5	BCCE	100 - 200	n	16.5273	9	LCRUST	Decapod		5.464	21.736	5.37512
OP3CE5	BCCE	100 - 200	n	16.5273	9	LEPTO	Leptocephalus		50.938	174.876	1.66288
OP3CE5	BCCE	100 - 200	n	16.5273	9	LARV	Ceratiidae	Ceratioid	23.331	33.465	3.28814
OP3CE5	BCCE	100 - 200	n	16.5273	9	MYCTO	Myctophidae		21.103	21.103	10.2337
OP3CE5	BCCE	100 - 200	n	16.5273	9	MYCTO	Myctophidae		24.632	26.611	16.0295
OP3CE5	BCCE	100 - 200	n	16.5273	9	MYCTO	Myctophidae		28.356	33.657	24.1192
OP3CE5	BCCE	100 - 200	n	16.5273	9	MYCTO	Myctophidae		27.869	31.879	22.9367
OP3CE5	BCCE	100 - 200	n	16.5273	9	MYCTO	Myctophidae		21.143	24.128	10.2901
OP3CE5	BCCE	100 - 200	n	16.5273	9	MYCTO	Myctophidae		50.711	59.395	130.315
OP3CE5	BCCE	100 - 200	n	16.5273	9	MYCTO	Myctophidae		78.041	90.209	455.312
OP3CE5	BCCE	100 - 200	n	16.5273	9	MYCTO	Myctophidae	Ceratoscopelus warmingii	78.558	93.344	464.12
OP3CE5	BCCE	100 - 200	n	16.5273	9	MYCTO	Myctophidae	Ceratoscopelus warmingii	50.491	59.764	128.681
OP3CE5	BCCE	100 - 200	n	16.5273	9	MYCTO	Myctophidae	Ceratoscopelus warmingii	28.039	33.963	23.345
OP3CE5	BCCE	100 - 200	n	16.5273	9	NANNO	Myctophidae	Nannobrachium atrum	20.85	25.807	9.88174
OP3CE5	BCCE	100 - 200	n	16.5273	9	MYCTO	Myctophidae	Unidentified Species	28.258	34.577	23.8781
OP3CE5	BCCE	100 - 200	n	16.5273	9	MYCTO	Myctophidae	Unidentified Species	25.528	29.143	17.7808
OP3CE5	BCCE	100 - 200	n	16.5273	9	MYCTO	Myctophidae	Unidentified Species	17.17	20.404	5.62459
OP3CE5	BCCE	100 - 200	n	16.5273	9	LARV	Unidentified Fish	Unidentified Species	22.944	30.283	0.0626973
OP12CE3	RWCE	300 - 400	d	18.9244	11.5	AMPHI	Amphipod		7.895	27.854	35.6926
OP12CE3	RWCE	300 - 400	d	18.9244	11.5	AMPHI	Amphipod		6.536	29.142	40.3569
OP12CE3	RWCE	300 - 400	d	18.9244	11.5	AMPHI	Amphipod		5.745	23.282	21.9287
OP3CE5	BCCE	100 - 200	n	16.5273	9	LCRUST	Decapod			27.528	13.1497
OP3CE5	BCCE	100 - 200	n	16.5273	9	LCRUST	Decapod			24.063	7.90061
OP3CE5	BCCE	100 - 200	n	16.5273	9	LCRUST	Decapod			23.794	7.57132
OP3CE5	BCCE	100 - 200	n	16.5273	9	LCRUST	Decapod			23.425	7.13618
OP3CE5	BCCE	100 - 200	n	16.5273	9	LCRUST	Decapod			20.788	4.5399
OP12CE3	RWCE	300 - 400	d	18.9244	11.5	AMPHI	Amphipod		9.674	32.109	52.5199
OP12CE3	RWCE	300 - 400	d	18.9244	11.5	AMPHI	Amphipod		9.386	28.818	39.1495
OP12CE3	RWCE	300 - 400	d	18.9244	11.5	AMPHI	Amphipod		9.783	29.794	42.8575
OP12CE3	RWCE	300 - 400	d	18.9244	11.5	AMPHI	Amphipod		8.564	32.258	53.1847
OP12CE3	RWCE	300 - 400	d	18.9244	11.5	AMPHI	Amphipod		4.929	27.888	35.8111
OP12CE3	RWCE	300 - 400	d	18.9244	11.5	AMPHI	Amphipod		9.352	26.475	31.0931
OP12CE3	RWCE	300 - 400	d	18.9244	11.5	AMPHI	Amphipod		10.876	28.67	38.6056
OP12CE3	RWCE	300 - 400	d	18.9244	11.5	AMPHI	Amphipod		8.393	29.73	42.6079
OP12CE4	RWCE	200 - 300	d	19.5383	11.5	AMPHI	Amphipod		6.746	28.418	37.6906
OP12CE4	RWCE	200 - 300	d	19.5383	11.5	AMPHI	Amphipod		8.158	23.828	23.3543
OP12CE5	RWCE	100 - 200	d	19.7971	11.5	AMPHI	Amphipod		5.657	20.606	15.7377
OP12CE6	RWCE	0 - 100	d	19.9618	11.5	AMPHI	Amphipod		9.074	34.115	61.9201
OP13CE2	RWCE	500 - 600	d	14.9834	11.5	AMPHI	Amphipod		7.884	27.832	35.6161
OP13CE2	RWCE	500 - 600	d	14.9834	11.5	AMPHI	Amphipod		7.528	31.556	50.0985
OP13CE2	RWCE	500 - 600	d	14.9834	11.5	AMPHI	Amphipod		8.729	28.715	38.7704
OP13CE5	RWCE	200 - 300	d	19.5383	11.5	AMPHI	Amphipod		10.157	30.104	44.0799
OP3CE5	BCCE	100 - 200	n	16.5273	9	MYCTO	Myctophidae		18.188	22.382	6.64789
OP3CE5	BCCE	100 - 200	n	16.5273	9	MYCTO	Myctophidae		28.441	28.441	24.3296
OP3CE5	BCCE	100 - 200	n	16.5273	9	MYCTO	Myctophidae		26.681	29.703	20.2128
OP3CE5	BCCE	100 - 200	n	16.5273	9	MYCTO	Myctophidae		20.477	24.908	9.37741
OP3CE5	BCCE	100 - 200	n	16.5273	9	MYCTO	Myctophidae		26.107	26.107	18.9765
OP3CE5	BCCE	100 - 200	n	16.5273	9	MYCTO	Myctophidae		24.063	24.063	14.9784
OP3CE5	BCCE	100 - 200	n	16.5273	9	HATCH	Sternoptychidae		22.778	27.613	18.3156
OP3CE5	BCCE	100 - 200	n	16.5273	9	FISH	Phosichthyidae	Vinciguerria poweriae	33.469	41.159	46.0619
OP3CE5	BCCE	100 - 200	n	16.5273	9	MYCTO	Myctophidae		19.348	22.402	7.95437
OP3CE5	BCCE	100 - 200	n	16.5273	9	MYCTO	Myctophidae		31.473	37.046	32.6441
OP3CE5	BCCE	100 - 200	n	16.5273	9	MYCTO	Myctophidae		23.632	28.26	14.213
OP3CE6	BCCE	0 - 100	n	19.6824	9	HATCH	Sternoptychidae	Argyropelecus hemigymnus	22.526	26.424	17.7243
OP3CE6	BCCE	0 - 100	n	19.6824	9	MYCTO	Myctophidae	Unidentified Species	32.374	37.233	35.4305
OP13CE5	RWCE	200 - 300	d	19.5383	11.5	AMPHI	Amphipod		8.544	31.504	49.8745
OP13CE5	RWCE	200 - 300	d	19.5383	11.5	AMPHI	Amphipod		7.596	20.374	15.2609
OP13CE5	RWCE	200 - 300	d	19.5383	11.5	AMPHI	Amphipod		9.608	27.33	33.8976
OP13CE5	RWCE	200 - 300	d	19.5383	11.5	AMPHI	Amphipod		9.007	22.731	20.5472
OP14CE4	RWCE	200 - 300	n	19.5383	10	AMPHI	Amphipod		10.783	26.467	31.0676
OP14CE4	RWCE	200 - 300	n	19.5383	10	AMPHI	Amphipod		8.439	25.94	29.4155
OP14CE4	RWCE	200 - 300	n	19.5383	10	AMPHI	Amphipod		10.625	29.189	40.534
OP14CE4	RWCE	200 - 300	n	19.5383	10	AMPHI	Amphipod		9.754	21.675	18.0559
OP14CE4	RWCE	200 - 300	n	19.5383	10	AMPHI	Amphipod		9.921	26.865	32.3534
OP14CE4	RWCE	200 - 300	n	19.5383	10	AMPHI	Amphipod		14.238	35.948	71.3818
OP14CE4	RWCE	200 - 300	n	19.5383	10	AMPHI	Amphipod		8.244	20.662	15.8541
OP14CE4	RWCE	200 - 300	n	19.5383	10	AMPHI	Amphipod		10.508	32.95	56.342
OP14CE4	RWCE	200 - 300	n	19.5383	10	AMPHI	Amphipod		7.173	30.307	44.8922
OP14CE4	RWCE	200 - 300	n	19.5383	10	AMPHI	Amphipod		13.798	29.403	41.3465
OP5CE2	BCCE	800 - 1000	d	#N/A	11	MYCTO	Myctophidae	Diaphus sp	48.733	54.279	116.105
OP5CE2	BCCE	800 - 1000	d	#N/A	11	MYCTO	Myctophidae	Diaphus sp	66.86	70.357	290.684
OP5CE2	BCCE	800 - 1000	d	#N/A	11	MYCTO	Myctophidae	Diaphus sp	81.197	84.059	510.826
OP5CE2	BCCE	800 - 1000	d	#N/A	11	NANNO	Myctophidae	Nannobrachium sp	102.406	109.105	1001.73
OP5CE2	BCCE	800 - 1000	d	#N/A	11	MYCTO	Myctophidae	Lampanyctus alatus	113.025	129.715	1333.83
OP5CE2	BCCE	800 - 1000	d	#N/A	11	MYCTO	Myctophidae		18.736	20.981	7.24596
OP5CE2	BCCE	800 - 1000	d	#N/A	11	FISH	Phosichthyidae	Vinciguerria poweriae	20.857	24.991	6.82942
OP5CE2	BCCE	800 - 1000	d	#N/A	11	MYCTO	Myctophidae		19.348	22.047	7.95437
OP5CE2	BCCE	800 - 1000	d	#N/A	11	MYCTO	Myctophidae		31.012	34.231	31.2757
OP5CE2	BCCE	800 - 1000	d	#N/A	11	FISH	Phosichthyidae	Vinciguerria poweriae	37.823	45.691	75.4582
OP5CE2	BCCE	800 - 1000	d	#N/A	11	MYCTO	Myctophidae		44.784	48.352	90.8545
OP5CE2	BCCE	800 - 1000	d	#N/A	11	FISH	Melamphaidae	Melamphaes simus	78.384	89.396	398.43
OP5CE2	BCCE	800 - 1000	d	#N/A	11	FISH	Melamphaidae	Melamphaes simus	128.55	134.275	1997.7
OP5CE2	BCCE	800 - 1000	d	#N/A	11	LGFISH	Bathylagidae	Melanolagus bericoides	113.321	120.368	1.48884
OP5CE2	BCCE	800 - 1000	d	#N/A	11	SLEND	Gonostomatidae	Cyclothone sp	27.557	32.023	0.00482791
OP5CE2	BCCE	800 - 1000	d	#N/A	11	SLEND	Gonostomatidae	Cyclothone sp	19.995	22.673	0.00187711
OP5CE2	BCCE	800 - 1000	d	#N/A	11	SLEND	Gonostomatidae	Cyclothone sp	43.947	48.214	0.0190855
OP5CE2	BCCE	800 - 1000	d	#N/A	11	SLEND	Gonostomatidae	Cyclothone sp	62.496	62.496	0.0538345
OP5CE2	BCCE	800 - 1000	d	#N/A	11	SLEND	Gonostomatidae	Cyclothone sp	40	40	0.0144658
OP5CE2	BCCE	800 - 1000	d	#N/A	11	SLEND	Gonostomatidae	Cyclothone sp	20.367	20.367	0.00198183
OP5CE2	BCCE	800 - 1000	d	#N/A	11	SLEND	Gonostomatidae	Cyclothone sp	62.53	62.53	0.0539208
OP5CE2	BCCE	800 - 1000	d	#N/A	11	SLEND	Gonostomatidae	Cyclothone sp	45.459	45.459	0.0210847
OP5CE2	BCCE	800 - 1000	d	#N/A	11	MYCTO	Myctophidae		41.421	41.421	72.4372
OP5CE2	BCCE	800 - 1000	d	#N/A	11	SLEND	Alepisauridae	Alepisaurus brevirostris	77.508	86.088	0.642689
OP5CE2	BCCE	800 - 1000	d	#N/A	11	TOOTH	Anoplogastridae	Anoplogaster cornuta	151.973	181.277	25.8338
OP5CE2	BCCE	800 - 1000	d	#N/A	11	LCRUST	Decapod		17.42	30.334	18.9914
OP5CE2	BCCE	800 - 1000	d	#N/A	11	LCRUST	Decapod		31.608	39.486	51.5489
OP5CE2	BCCE	800 - 1000	d	#N/A	11	LCRUST	Decapod		5.546	30.568	19.5522
OP5CE2	BCCE	800 - 1000	d	#N/A	11	LCRUST	Decapod		8.576	27.832	13.7082
OP5CE2	BCCE	800 - 1000	d	#N/A	11	LCRUST	Decapod		6.827	27.036	12.2816
OP5CE2	BCCE	800 - 1000	d	#N/A	11	LCRUST	Decapod		14.676	41.793	63.9158
OP5CE2	BCCE	800 - 1000	d	#N/A	11	LCRUST	Decapod		56.339	140.867	6368.39
OP5CE2	BCCE	800 - 1000	d	#N/A	11	HATCH	Sternoptychidae	Argyropelecus gigas	36.31	45.374	72.4818
OP5CE2	BCCE	800 - 1000	d	#N/A	11	HATCH	Sternoptychidae	Sternoptyx Diaphana	25.581	33.907	52.3319
OP5CE2	BCCE	800 - 1000	d	#N/A	11	HATCH	Sternoptychidae	Sternoptyx Diaphana	34.977	46.097	128.721
OP5CE2	BCCE	800 - 1000	d	#N/A	11	HATCH	Sternoptychidae	Sternoptyx Diaphana	18.972	24.175	22.1472
OP5CE2	BCCE	800 - 1000	d	#N/A	11	HATCH	Sternoptychidae	Sternoptyx Diaphana	16.236	20.461	14.1493
OP5CE2	BCCE	800 - 1000	d	#N/A	11	HATCH	Sternoptychidae	Sternoptyx Diaphana	28.364	35.73	70.4369
OP5CE2	BCCE	800 - 1000	d	#N/A	11	TOOTH	Anoplogastridae	Anoplogaster cornuta	153.868	175.802	26.6071
OP5CE2	BCCE	800 - 1000	d	#N/A	11	TOOTH	Anoplogastridae	Anoplogaster cornuta	12.22		0.0640935
OP5CE2	BCCE	800 - 1000	d	#N/A	11	LCRUST	Decapod			170.324	13071.7
OP5CE2	BCCE	800 - 1000	d	#N/A	11	SLEND	Gonostomatidae	Cyclothone sp	41.252	41.252	0.0158402
OP5CE2	BCCE	800 - 1000	d	#N/A	11	SLEND	Gonostomatidae	Cyclothone sp	44.984	44.984	0.0204424
OP5CE2	BCCE	800 - 1000	d	#N/A	11	SLEND	Gonostomatidae	Cyclothone sp	21.223	21.223	0.00223729
OP5CE2	BCCE	800 - 1000	d	#N/A	11	SLEND	Gonostomatidae	Cyclothone sp	33.344	33.344	0.00846375
OP5CE2	BCCE	800 - 1000	d	#N/A	11	SLEND	Gonostomatidae	Cyclothone sp	33.433	33.433	0.00853046
OP5CE2	BCCE	800 - 1000	d	#N/A	11	SLEND	Gonostomatidae	Cyclothone sp	25.687	25.687	0.00392538
OP5CE2	BCCE	800 - 1000	d	#N/A	11	SLEND	Gonostomatidae	Cyclothone sp	46.918	46.918	0.0231404
OP5CE2	BCCE	800 - 1000	d	#N/A	11	SLEND	Gonostomatidae	Cyclothone sp	21.054	21.054	0.00218523
OP5CE2	BCCE	800 - 1000	d	#N/A	11	SLEND	Gonostomatidae	Cyclothone sp	25.902	25.902	0.00402293
OP5CE2	BCCE	800 - 1000	d	#N/A	11	MYCTO	Myctophidae	Diaphus sp	79.914	84.721	487.752
OP5CE2	BCCE	800 - 1000	d	#N/A	11	MYCTO	Myctophidae	Diaphus sp	69.794	74.402	329.267
OP5CE2	BCCE	800 - 1000	d	#N/A	11	MYCTO	Myctophidae	Diaphus sp	47.632	51.888	108.655
OP5CE2	BCCE	800 - 1000	d	#N/A	11	MYCTO	Myctophidae	Lampanyctus alatus	109.345	126.804	1211.66
OP5CE2	BCCE	800 - 1000	d	#N/A	11	NANNO	Myctophidae	Nannobrachium wisneri	100.549	111.557	949.922
OP5CE2	BCCE	800 - 1000	d	#N/A	11	LCRUST	Decapod			33.62	28.0359
OP5CE2	BCCE	800 - 1000	d	#N/A	11	LARV	Ceratiidae	Ceratioid	21.56	21.56	2.69496
OP5CE2	BCCE	800 - 1000	d	#N/A	11	LCRUST	Decapod			29.53	17.1545
OP14CE5	RWCE	100 - 200	n	19.7971	10	AMPHI	Amphipod		9.709	22.963	21.1219
OP5CE3	BCCE	700 - 800	d	6.4918	11	MYCTO	Myctophidae	Bolinichthys longipes	115.849	136.152	1432.86
OP5CE3	BCCE	700 - 800	d	6.4918	11	TOOTH	Stomiidae	Chauliodus sloani	110.5	119.947	165.589
OP5CE3	BCCE	700 - 800	d	6.4918	11	DBFISH	Linophrynidae	Haplophryne mollis	31.744	44.648	7.14406
OP5CE3	BCCE	700 - 800	d	6.4918	11	TOOTH	Stomiidae	Malacosteus sp	176.381	191.617	538.042
OP5CE3	BCCE	700 - 800	d	6.4918	11	TOOTH	Stomiidae	Malacosteus sp	108.238	114.889	157.179
OP5CE3	BCCE	700 - 800	d	6.4918	11	HATCH	Sternoptychidae	Sternoptyx diaphana	35.94	45.707	139.183
OP5CE3	BCCE	700 - 800	d	6.4918	11	HATCH	Sternoptychidae	Sternoptyx diaphana	26.032	33.939	55.0305
OP5CE3	BCCE	700 - 800	d	6.4918	11	HATCH	Sternoptychidae	Sternoptyx diaphana	21.642	26.522	32.3473
OP5CE3	BCCE	700 - 800	d	6.4918	11	SLEND	Gonostomatidae	Cyclothone sp	33.415	36.741	0.00851694
OP5CE3	BCCE	700 - 800	d	6.4918	11	SLEND	Gonostomatidae	Cyclothone sp	25.257	27.928	0.003735
OP5CE3	BCCE	700 - 800	d	6.4918	11	SLEND	Gonostomatidae	Cyclothone sp	33.347	36.509	0.008466
OP5CE3	BCCE	700 - 800	d	6.4918	11	SLEND	Gonostomatidae	Cyclothone sp	47.083	47.083	0.0233809
OP5CE3	BCCE	700 - 800	d	6.4918	11	SLEND	Gonostomatidae	Cyclothone sp	31.101	31.101	0.0068944
OP5CE3	BCCE	700 - 800	d	6.4918	11	SLEND	Gonostomatidae	Cyclothone sp	20.742	23.006	0.00209123
OP5CE3	BCCE	700 - 800	d	6.4918	11	SLEND	Gonostomatidae	Cyclothone sp	37.876	37.876	0.0123185
OP5CE3	BCCE	700 - 800	d	6.4918	11	SLEND	Gonostomatidae	Cyclothone sp	45.566	45.566	0.0212311
OP5CE3	BCCE	700 - 800	d	6.4918	11	SLEND	Gonostomatidae	Cyclothone sp	40.211	40.211	0.0146917
OP5CE3	BCCE	700 - 800	d	6.4918	11	SLEND	Gonostomatidae	Cyclothone sp	27.138	30.849	0.0046149
OP5CE3	BCCE	700 - 800	d	6.4918	11	SLEND	Gonostomatidae	Cyclothone sp	22.081	22.081	0.00251427
OP5CE3	BCCE	700 - 800	d	6.4918	11	LCRUST	Decapod		7.208	26.991	12.2044
OP5CE3	BCCE	700 - 800	d	6.4918	11	LCRUST	Decapod		12.981	28.581	15.1584
OP5CE3	BCCE	700 - 800	d	6.4918	11	LCRUST	Decapod		21.353	72.695	520.004
OP5CE3	BCCE	700 - 800	d	6.4918	11	LCRUST	Decapod		23.182	72.42	512.594
OP5CE3	BCCE	700 - 800	d	6.4918	11	LCRUST	Decapod		26.615	79.722	737.506
OP5CE3	BCCE	700 - 800	d	6.4918	11	LCRUST	Decapod		72.949	166.488	11991.3
OP14CE5	RWCE	100 - 200	n	19.7971	10	AMPHI	Amphipod		10.158	20.689	15.9105
OP14CE5	RWCE	100 - 200	n	19.7971	10	AMPHI	Amphipod		10.899	22.319	19.551
OP14CE5	RWCE	100 - 200	n	19.7971	10	AMPHI	Amphipod		10.66	26.31	30.5694
OP5CE4	BCCE	500 - 600	d	8.4596	11	HATCH	Sternoptychidae	Argyropelecus olfersii	48.295	56.348	168.137
OP5CE4	BCCE	500 - 600	d	8.4596	11	HATCH	Sternoptychidae	Argyropelecus olfersii	44.421	53.328	131.382
OP5CE4	BCCE	500 - 600	d	8.4596	11	HATCH	Sternoptychidae	Argyropelecus olfersii	33.742	40.424	58.3788
OP5CE4	BCCE	500 - 600	d	8.4596	11	MYCTO	Myctophidae	Diaphus phillipsi	73.891	81.809	388.544
OP5CE4	BCCE	500 - 600	d	8.4596	11	MYCTO	Myctophidae	Diaphus phillipsi	81.439	90.75	515.257
OP5CE4	BCCE	500 - 600	d	8.4596	11	MYCTO	Myctophidae	Diaphus phillipsi	82.756	90.672	539.811
OP5CE4	BCCE	500 - 600	d	8.4596	11	MYCTO	Myctophidae	Diaphus phillipsi	84.868	93.711	580.768
OP5CE4	BCCE	500 - 600	d	8.4596	11	MYCTO	Myctophidae	Diaphus phillipsi	43.917	50.245	85.8436
OP5CE4	BCCE	500 - 600	d	8.4596	11	MYCTO	Myctophidae	Diaphus phillipsi	36.142	40.246	48.7685
OP5CE4	BCCE	500 - 600	d	8.4596	11	MYCTO	Myctophidae	Diaphus phillipsi	68.21	73.278	308.045
OP5CE4	BCCE	500 - 600	d	8.4596	11	MYCTO	Myctophidae	Diaphus phillipsi	77.253	87.397	442.098
OP5CE4	BCCE	500 - 600	d	8.4596	11	MYCTO	Myctophidae	Diaphus phillipsi	82.216	90.476	529.653
OP5CE4	BCCE	500 - 600	d	8.4596	11	MYCTO	Myctophidae	Diaphus phillipsi	77.494	85.542	446.112
OP5CE4	BCCE	500 - 600	d	8.4596	11	MYCTO	Myctophidae	Diaphus phillipsi	75.13	83.18	407.754
OP5CE4	BCCE	500 - 600	d	8.4596	11	MYCTO	Myctophidae	Diaphus phillipsi	78.832	87.713	468.833
OP5CE4	BCCE	500 - 600	d	8.4596	11	MYCTO	Myctophidae	Diaphus phillipsi	78.282	86.963	459.404
OP5CE4	BCCE	500 - 600	d	8.4596	11	MYCTO	Myctophidae	Diaphus phillipsi	78.531	87.232	463.657
OP5CE4	BCCE	500 - 600	d	8.4596	11	MYCTO	Myctophidae	Diaphus phillipsi	76.872	85.712	435.8
OP5CE4	BCCE	500 - 600	d	8.4596	11	FISH	Melamphaidae	Melamphaes simus	50.513	59.029	95.1602
OP5CE4	BCCE	500 - 600	d	8.4596	11	LCRUST	Decapod		18.99	59.947	250.55
OP5CE4	BCCE	500 - 600	d	8.4596	11	LCRUST	Decapod		19.315	62.041	285.341
OP5CE4	BCCE	500 - 600	d	8.4596	11	LCRUST	Decapod		16.192	62.431	292.193
OP5CE4	BCCE	500 - 600	d	8.4596	11	LCRUST	Decapod		8.161	34.428	30.6743
OP5CE4	BCCE	500 - 600	d	8.4596	11	LCRUST	Decapod		7.061	22.238	5.86058
OP5CE4	BCCE	500 - 600	d	8.4596	11	FISH	Phosichthyidae	Vinciguerria poweriae	32.703	39.211	41.9526
OP3CE2	BCCE	400 - 500	n	9.9162	9	CEPHA	Cephalopod	Unidentified Species	14.271	24.813	76.7946
OP3CE4	BCCE	200 - 300	n	13.9728	9	CEPHA	Cephalopod		31.786	31.786	146.609
OP5CE4	BCCE	500 - 600	d	8.4596	11	SLEND	Gonostomatidae	Cyclothone sp	32.302	32.302	0.00770826
OP5CE4	BCCE	500 - 600	d	8.4596	11	SLEND	Gonostomatidae	Cyclothone sp	30.972	30.972	0.00681052
OP5CE4	BCCE	500 - 600	d	8.4596	11	SLEND	Gonostomatidae	Cyclothone sp	29.826	29.826	0.00609478
OP5CE4	BCCE	500 - 600	d	8.4596	11	SLEND	Gonostomatidae	Cyclothone sp	26.648	26.648	0.00437379
OP5CE4	BCCE	500 - 600	d	8.4596	11	SLEND	Gonostomatidae	Cyclothone sp	22.549	22.549	0.00267446
OP5CE4	BCCE	500 - 600	d	8.4596	11	SLEND	Gonostomatidae	Cyclothone sp	22.108	22.108	0.00252333
OP5CE4	BCCE	500 - 600	d	8.4596	11	SLEND	Gonostomatidae	Cyclothone sp	25.752	25.752	0.00395471
OP5CE4	BCCE	500 - 600	d	8.4596	11	SLEND	Gonostomatidae	Cyclothone sp	27.726	27.726	0.00491562
OP5CE4	BCCE	500 - 600	d	8.4596	11	SLEND	Gonostomatidae	Cyclothone sp	24.622	24.622	0.00346516
OP5CE4	BCCE	500 - 600	d	8.4596	11	SLEND	Gonostomatidae	Cyclothone sp	24.392	24.392	0.0033707
OP5CE4	BCCE	500 - 600	d	8.4596	11	SLEND	Gonostomatidae	Cyclothone sp	25.437	25.437	0.00381393
OP5CE4	BCCE	500 - 600	d	8.4596	11	SLEND	Gonostomatidae	Cyclothone sp	22.561	22.561	0.00267865
OP5CE4	BCCE	500 - 600	d	8.4596	11	SLEND	Gonostomatidae	Cyclothone sp	34.186	34.186	0.00910876
OP5CE4	BCCE	500 - 600	d	8.4596	11	SLEND	Gonostomatidae	Cyclothone sp	25.188	25.188	0.00370503
OP5CE4	BCCE	500 - 600	d	8.4596	11	SLEND	Gonostomatidae	Cyclothone sp	22.8	22.8	0.00276308
OP5CE4	BCCE	500 - 600	d	8.4596	11	SLEND	Gonostomatidae	Cyclothone sp	33.231	33.231	0.00837956
OP5CE4	BCCE	500 - 600	d	8.4596	11	SLEND	Gonostomatidae	Cyclothone sp	22.618	22.618	0.00269863
OP5CE4	BCCE	500 - 600	d	8.4596	11	SLEND	Gonostomatidae	Cyclothone sp	30.536	30.536	0.00653202
OP5CE4	BCCE	500 - 600	d	8.4596	11	SLEND	Gonostomatidae	Cyclothone sp	21.263	21.263	0.00224973
OP5CE4	BCCE	500 - 600	d	8.4596	11	SLEND	Gonostomatidae	Cyclothone sp	25.306	25.306	0.00375638
OP5CE4	BCCE	500 - 600	d	8.4596	11	SLEND	Gonostomatidae	Cyclothone sp	23.583	23.583	0.00305197
OP5CE4	BCCE	500 - 600	d	8.4596	11	SLEND	Gonostomatidae	Cyclothone sp	25.046	25.046	0.00364385
OP5CE4	BCCE	500 - 600	d	8.4596	11	SLEND	Gonostomatidae	Cyclothone sp	35.184	35.184	0.00991431
OP5CE4	BCCE	500 - 600	d	8.4596	11	SLEND	Gonostomatidae	Cyclothone sp	22.281	22.281	0.00258192
OP5CE4	BCCE	500 - 600	d	8.4596	11	SLEND	Gonostomatidae	Cyclothone sp	26.275	26.275	0.00419594
OP5CE4	BCCE	500 - 600	d	8.4596	11	SLEND	Gonostomatidae	Cyclothone sp	20.128	20.128	0.00191412
OP5CE4	BCCE	500 - 600	d	8.4596	11	MYCTO	Myctophidae		18.745	20.757	7.25607
OP5CE4	BCCE	500 - 600	d	8.4596	11	SLEND	Gonostomatidae	Cyclothone sp	22.165	22.165	0.00254254
OP5CE4	BCCE	500 - 600	d	8.4596	11	SLEND	Gonostomatidae	Cyclothone sp	20.042	20.042	0.00189013
OP5CE4	BCCE	500 - 600	d	8.4596	11	MYCTO	Myctophidae		87.426	87.426	633.037
OP5CE5	BCCE	500 - 600	d	8.4596	11	MYCTO	Myctophidae	Diaphus sp	72.09	80.7408	361.694
OP5CE5	BCCE	500 - 600	d	8.4596	11	MYCTO	Myctophidae	Diaphus sp	71.52	80.1024	353.457
OP5CE5	BCCE	500 - 600	d	8.4596	11	MYCTO	Myctophidae	Diaphus sp	65.649	73.5269	275.666
OP5CE5	BCCE	500 - 600	d	8.4596	11	MYCTO	Myctophidae	Diaphus sp	70.946	79.4595	345.287
OP5CE5	BCCE	500 - 600	d	8.4596	11	MYCTO	Myctophidae	Diaphus sp	67.408	75.497	297.652
OP5CE5	BCCE	500 - 600	d	8.4596	11	MYCTO	Myctophidae	Diaphus sp	68.203	76.3874	307.954
OP5CE5	BCCE	500 - 600	d	8.4596	11	MYCTO	Myctophidae	Diaphus sp	71.719	80.3253	356.318
OP5CE5	BCCE	500 - 600	d	8.4596	11	MYCTO	Myctophidae	Diaphus sp	72.416	81.1059	366.461
OP5CE5	BCCE	500 - 600	d	8.4596	11	MYCTO	Myctophidae	Diaphus sp	65.778	73.6714	277.241
OP5CE5	BCCE	500 - 600	d	8.4596	11	MYCTO	Myctophidae	Diaphus sp	76.118	85.2522	423.51
OP5CE5	BCCE	500 - 600	d	8.4596	11	MYCTO	Myctophidae	Diaphus sp	74.374	83.2989	395.961
OP5CE5	BCCE	500 - 600	d	8.4596	11	MYCTO	Myctophidae	Diaphus sp	65.059	72.8661	268.538
OP5CE5	BCCE	500 - 600	d	8.4596	11	MYCTO	Myctophidae	Diaphus sp	56.408	63.177	177.492
OP5CE5	BCCE	500 - 600	d	8.4596	11	MYCTO	Myctophidae	Diaphus sp	66.476	74.4531	285.865
OP5CE5	BCCE	500 - 600	d	8.4596	11	MYCTO	Myctophidae	Diaphus sp	62.164	69.6237	235.309
OP5CE5	BCCE	500 - 600	d	8.4596	11	MYCTO	Myctophidae	Diaphus sp	59.681	66.8427	209.057
OP5CE5	BCCE	500 - 600	d	8.4596	11	MYCTO	Myctophidae	Diaphus sp	57.614	64.5277	188.73
OP5CE5	BCCE	500 - 600	d	8.4596	11	MYCTO	Myctophidae	Diaphus sp	65.506	73.3667	273.927
OP5CE5	BCCE	500 - 600	d	8.4596	11	MYCTO	Myctophidae	Diaphus sp	53.139	59.5157	149.258
OP5CE5	BCCE	500 - 600	d	8.4596	11	MYCTO	Myctophidae	Diaphus sp	65.847	73.7486	278.086
OP5CE5	BCCE	500 - 600	d	8.4596	11	MYCTO	Myctophidae	Diaphus sp	61.855	69.2776	231.93
OP5CE5	BCCE	500 - 600	d	8.4596	11	MYCTO	Myctophidae	Diaphus sp	63.885	71.5512	254.716
OP5CE5	BCCE	500 - 600	d	8.4596	11	MYCTO	Myctophidae	Diaphus sp	62.814	70.3517	242.52
OP5CE5	BCCE	500 - 600	d	8.4596	11	MYCTO	Myctophidae	Diaphus sp	67.702	75.8262	301.435
OP5CE5	BCCE	500 - 600	d	8.4596	11	MYCTO	Myctophidae	Diaphus sp	64.584	72.3341	262.888
OP5CE5	BCCE	500 - 600	d	8.4596	11	MYCTO	Myctophidae	Diaphus sp	19.915	22.3048	8.64986
OP5CE5	BCCE	500 - 600	d	8.4596	11	MYCTO	Myctophidae	Diaphus sp	22.516	25.2179	12.3514
OP5CE5	BCCE	500 - 600	d	8.4596	11	MYCTO	Myctophidae	Diaphus sp	32.116	35.9699	34.6173
OP5CE5	BCCE	500 - 600	d	8.4596	11	MYCTO	Myctophidae	Diaphus sp	68.531	76.7547	312.271
OP5CE5	BCCE	500 - 600	d	8.4596	11	MYCTO	Myctophidae	Diaphus sp	67.06	75.1072	293.214
OP5CE5	BCCE	500 - 600	d	8.4596	11	MYCTO	Myctophidae	Diaphus sp	72.964	81.7197	374.567
OP5CE5	BCCE	500 - 600	d	8.4596	11	MYCTO	Myctophidae	Diaphus sp	67.664	75.7837	300.944
OP5CE5	BCCE	500 - 600	d	8.4596	11	MYCTO	Myctophidae	Diaphus sp	66.364	74.3277	284.47
OP5CE5	BCCE	500 - 600	d	8.4596	11	MYCTO	Myctophidae	Diaphus sp	72.611	81.3243	369.332
OP5CE5	BCCE	500 - 600	d	8.4596	11	MYCTO	Myctophidae	Diaphus sp	71.14	79.6768	348.034
OP5CE5	BCCE	500 - 600	d	8.4596	11	MYCTO	Myctophidae	Diaphus sp	68.578	76.8074	312.893
OP5CE5	BCCE	500 - 600	d	8.4596	11	MYCTO	Myctophidae	Diaphus sp	69.013	77.2946	318.688
OP5CE5	BCCE	500 - 600	d	8.4596	11	MYCTO	Myctophidae	Diaphus sp	73.045	81.8104	375.775
OP5CE5	BCCE	500 - 600	d	8.4596	11	MYCTO	Myctophidae	Diaphus sp	76.408	85.577	428.21
OP5CE5	BCCE	500 - 600	d	8.4596	11	MYCTO	Myctophidae	Diaphus sp	31.936	35.7683	34.0573
OP5CE5	BCCE	500 - 600	d	8.4596	11	MYCTO	Myctophidae	Diaphus sp	24.334	27.2541	15.4732
OP5CE5	BCCE	500 - 600	d	8.4596	11	MYCTO	Myctophidae	Diaphus sp	24.451	27.3851	15.6901
OP5CE5	BCCE	500 - 600	d	8.4596	11	MYCTO	Myctophidae	Diaphus sp	19.296	21.6115	7.89249
OP5CE5	BCCE	500 - 600	d	8.4596	11	MYCTO	Myctophidae	Diaphus sp	25.837	28.9374	18.4126
OP5CE5	BCCE	500 - 600	d	8.4596	11	MYCTO	Myctophidae	Diaphus sp	60.421	67.6715	216.668
OP5CE5	BCCE	500 - 600	d	8.4596	11	MYCTO	Myctophidae	Diaphus sp	49.032	54.9158	118.184
OP5CE5	BCCE	500 - 600	d	8.4596	11	MYCTO	Myctophidae	Diaphus sp	38.571	43.1995	58.9002
OP5CE5	BCCE	500 - 600	d	8.4596	11	MYCTO	Myctophidae	Diaphus sp	46.014	51.5357	98.2867
OP5CE5	BCCE	500 - 600	d	8.4596	11	MYCTO	Myctophidae	Diaphus sp	58.066	65.0339	193.059
OP5CE5	BCCE	500 - 600	d	8.4596	11	MYCTO	Myctophidae	Diaphus sp	45.023	50.4258	92.2687
OP5CE5	BCCE	500 - 600	d	8.4596	11	MYCTO	Myctophidae	Diaphus sp	60.932	68.2438	222.029
OP5CE5	BCCE	500 - 600	d	8.4596	11	MYCTO	Myctophidae	Diaphus sp	58.23	65.2176	194.645
OP5CE5	BCCE	500 - 600	d	8.4596	11	MYCTO	Myctophidae	Diaphus sp	33.143	37.1202	37.9284
OP5CE5	BCCE	500 - 600	d	8.4596	11	MYCTO	Myctophidae	Diaphus sp	32.06	35.9072	34.4424
OP5CE5	BCCE	500 - 600	d	8.4596	11	MYCTO	Myctophidae	Diaphus sp	42.819	47.9573	79.7622
OP5CE5	BCCE	500 - 600	d	8.4596	11	MYCTO	Myctophidae	Diaphus sp	46.849	52.4709	103.552
OP5CE5	BCCE	500 - 600	d	8.4596	11	MYCTO	Myctophidae	Diaphus sp	45.943	51.4562	97.8472
OP5CE5	BCCE	500 - 600	d	8.4596	11	MYCTO	Myctophidae	Diaphus sp	47.807	53.5438	109.818
OP5CE5	BCCE	500 - 600	d	8.4596	11	MYCTO	Myctophidae	Diaphus sp	30.162	33.7814	28.8523
OP5CE5	BCCE	500 - 600	d	8.4596	11	MYCTO	Myctophidae	Diaphus sp	80.344	89.9853	495.408
OP5CE5	BCCE	500 - 600	d	8.4596	11	MYCTO	Myctophidae	Diaphus sp	68.387	76.5934	310.371
OP5CE5	BCCE	500 - 600	d	8.4596	11	MYCTO	Myctophidae	Diaphus sp	60.931	68.2427	222.018
OP5CE5	BCCE	500 - 600	d	8.4596	11	MYCTO	Myctophidae	Diaphus sp	60.844	68.1453	221.099
OP5CE5	BCCE	500 - 600	d	8.4596	11	MYCTO	Myctophidae	Diaphus sp	59.46	66.5952	206.818
OP5CE5	BCCE	500 - 600	d	8.4596	11	MYCTO	Myctophidae	Diaphus sp	56.202	62.9462	175.617
OP5CE5	BCCE	500 - 600	d	8.4596	11	MYCTO	Myctophidae	Diaphus sp	58.745	65.7944	199.683
OP5CE5	BCCE	500 - 600	d	8.4596	11	MYCTO	Myctophidae	Diaphus sp	60.591	67.8619	218.442
OP5CE5	BCCE	500 - 600	d	8.4596	11	MYCTO	Myctophidae	Diaphus sp	56.608	63.401	179.324
OP5CE5	BCCE	500 - 600	d	8.4596	11	LCRUST	Decapod		5.487	26.19	10.8885
OP5CE5	BCCE	500 - 600	d	8.4596	11	LCRUST	Decapod		16.127	45.296	86.6938
OP5CE5	BCCE	500 - 600	d	8.4596	11	LCRUST	Decapod		6.341	20.744	4.50361
OP5CE5	BCCE	500 - 600	d	8.4596	11	LCRUST	Decapod		6.102	25.729	10.1803
OP5CE5	BCCE	500 - 600	d	8.4596	11	LCRUST	Decapod		7.016	25.462	9.78598
OP5CE5	BCCE	500 - 600	d	8.4596	11	LCRUST	Decapod		10.202	27.731	13.5207
OP5CE5	BCCE	500 - 600	d	8.4596	11	LCRUST	Decapod		10.662	29.658	17.4378
OP5CE5	BCCE	500 - 600	d	8.4596	11	LCRUST	Decapod		9.278	26.034	10.6449
OP5CE5	BCCE	500 - 600	d	8.4596	11	LCRUST	Decapod		7.943	21.079	4.7853
OP5CE5	BCCE	500 - 600	d	8.4596	11	LCRUST	Decapod		8.294	27.984	13.9938
OP5CE5	BCCE	500 - 600	d	8.4596	11	LCRUST	Decapod		6.323	25.004	9.1359
OP5CE5	BCCE	500 - 600	d	8.4596	11	LCRUST	Decapod		6.827	24.591	8.57746
OP5CE5	BCCE	500 - 600	d	8.4596	11	LCRUST	Decapod		8.068	24.868	8.94914
OP5CE5	BCCE	500 - 600	d	8.4596	11	LCRUST	Decapod		20.984	78.57	697.954
OP5CE5	BCCE	500 - 600	d	8.4596	11	HATCH	Sternoptychidae	Argyropelecus aculeatus	26.91	33.6375	29.95
OP5CE5	BCCE	500 - 600	d	8.4596	11	HATCH	Sternoptychidae	Argyropelecus aculeatus	27.56	34.45	32.1348
OP5CE5	BCCE	500 - 600	d	8.4596	11	HATCH	Sternoptychidae	Argyropelecus aculeatus	51.376	64.22	201.787
OP5CE5	BCCE	500 - 600	d	8.4596	11	HATCH	Sternoptychidae	Argyropelecus aculeatus	20.735	25.9187	13.8812
OP5CE5	BCCE	500 - 600	d	8.4596	11	HATCH	Sternoptychidae	Argyropelecus aculeatus	31.057	38.8212	45.7111
OP5CE5	BCCE	500 - 600	d	8.4596	11	HATCH	Sternoptychidae	Argyropelecus aculeatus	31.565	39.4563	47.9522
OP5CE5	BCCE	500 - 600	d	8.4596	11	HATCH	Sternoptychidae	Argyropelecus aculeatus	41.343	51.6788	106.301
OP5CE5	BCCE	500 - 600	d	8.4596	11	HATCH	Sternoptychidae	Argyropelecus aculeatus	43.061	53.8263	119.867
OP5CE5	BCCE	500 - 600	d	8.4596	11	HATCH	Sternoptychidae	Argyropelecus aculeatus	35.406	44.2575	67.2865
OP5CE5	BCCE	500 - 600	d	8.4596	11	HATCH	Sternoptychidae	Argyropelecus aculeatus	41.004	51.255	103.75
OP5CE5	BCCE	500 - 600	d	8.4596	11	HATCH	Sternoptychidae	Argyropelecus hemigymnus	22.058	29.0063	16.6599
OP5CE5	BCCE	500 - 600	d	8.4596	11	HATCH	Sternoptychidae	Argyropelecus hemigymnus	21.156	27.8201	14.7292
OP5CE5	BCCE	500 - 600	d	8.4596	11	HATCH	Sternoptychidae	Argyropelecus hemigymnus	19.853	26.1067	12.2106
OP5CE5	BCCE	500 - 600	d	8.4596	11	HATCH	Sternoptychidae	Argyropelecus hemigymnus	22.956	30.1871	18.7411
OP5CE5	BCCE	500 - 600	d	8.4596	11	HATCH	Sternoptychidae	Argyropelecus hemigymnus	23.901	31.4298	21.1095
OP5CE5	BCCE	500 - 600	d	8.4596	11	HATCH	Sternoptychidae	Polyipnus ruggeri	29.193		38.0823
OP5CE5	BCCE	500 - 600	d	8.4596	11	HATCH	Sternoptychidae	Polyipnus ruggeri	22.535		17.7452
OP5CE5	BCCE	500 - 600	d	8.4596	11	HATCH	Sternoptychidae	Polyipnus ruggeri	27.139		30.7081
OP5CE5	BCCE	500 - 600	d	8.4596	11	HATCH	Sternoptychidae	Polyipnus ruggeri	37		76.6207
OP5CE5	BCCE	500 - 600	d	8.4596	11	HATCH	Sternoptychidae	Polyipnus ruggeri	31.674		48.4423
OP5CE5	BCCE	500 - 600	d	8.4596	11	HATCH	Sternoptychidae	Polyipnus ruggeri	26.91		29.95
OP5CE5	BCCE	500 - 600	d	8.4596	11	SCOPE	Myctophidae	Scopelopsis multipunctatus	63.801		253.745
OP5CE5	BCCE	500 - 600	d	8.4596	11	SCOPE	Myctophidae	Scopelopsis multipunctatus	60.943		222.145
OP5CE5	BCCE	500 - 600	d	8.4596	11	SCOPE	Myctophidae	Scopelopsis multipunctatus	59.801		210.279
OP5CE5	BCCE	500 - 600	d	8.4596	11	SCOPE	Myctophidae	Scopelopsis multipunctatus	56.59		179.159
OP5CE5	BCCE	500 - 600	d	8.4596	11	SCOPE	Myctophidae	Scopelopsis multipunctatus	58.691		199.151
OP5CE5	BCCE	500 - 600	d	8.4596	11	SCOPE	Myctophidae	Scopelopsis multipunctatus	61.528		228.39
OP5CE5	BCCE	500 - 600	d	8.4596	11	SCOPE	Myctophidae	Scopelopsis multipunctatus	57.373		186.448
OP5CE5	BCCE	500 - 600	d	8.4596	11	SCOPE	Myctophidae	Scopelopsis multipunctatus	63.994		255.979
OP5CE5	BCCE	500 - 600	d	8.4596	11	SCOPE	Myctophidae	Scopelopsis multipunctatus	63.939		255.341
OP5CE5	BCCE	500 - 600	d	8.4596	11	SCOPE	Myctophidae	Scopelopsis multipunctatus	62.362		237.49
OP5CE5	BCCE	500 - 600	d	8.4596	11	SCOPE	Myctophidae	Scopelopsis multipunctatus	59.406		206.273
OP5CE5	BCCE	500 - 600	d	8.4596	11	SCOPE	Myctophidae	Scopelopsis multipunctatus	61.119		224.012
OP5CE5	BCCE	500 - 600	d	8.4596	11	SCOPE	Myctophidae	Scopelopsis multipunctatus	27.017		20.9604
OP5CE5	BCCE	500 - 600	d	8.4596	11	SCOPE	Myctophidae	Scopelopsis multipunctatus	24.115		15.0725
OP5CE5	BCCE	500 - 600	d	8.4596	11	SCOPE	Myctophidae	Scopelopsis multipunctatus	61.281		225.739
OP5CE5	BCCE	500 - 600	d	8.4596	11	SCOPE	Myctophidae	Scopelopsis multipunctatus	59.39		206.112
OP5CE5	BCCE	500 - 600	d	8.4596	11	SCOPE	Myctophidae	Scopelopsis multipunctatus	63.26		247.551
OP5CE5	BCCE	500 - 600	d	8.4596	11	SCOPE	Myctophidae	Scopelopsis multipunctatus	50.136		126.073
OP5CE5	BCCE	500 - 600	d	8.4596	11	SCOPE	Myctophidae	Scopelopsis multipunctatus	60.43		216.762
OP5CE5	BCCE	500 - 600	d	8.4596	11	SCOPE	Myctophidae	Scopelopsis multipunctatus	64.787		265.293
OP5CE5	BCCE	500 - 600	d	8.4596	11	SCOPE	Myctophidae	Scopelopsis multipunctatus	60.434		216.803
OP5CE5	BCCE	500 - 600	d	8.4596	11	SCOPE	Myctophidae	Scopelopsis multipunctatus	63.704		252.627
OP5CE5	BCCE	500 - 600	d	8.4596	11	SCOPE	Myctophidae	Scopelopsis multipunctatus	62.06		234.168
OP5CE5	BCCE	500 - 600	d	8.4596	11	SCOPE	Myctophidae	Scopelopsis multipunctatus	61.433		227.368
OP5CE5	BCCE	500 - 600	d	8.4596	11	SCOPE	Myctophidae	Scopelopsis multipunctatus	59.851		210.79
OP5CE5	BCCE	500 - 600	d	8.4596	11	SCOPE	Myctophidae	Scopelopsis multipunctatus	65.726		276.606
OP5CE5	BCCE	500 - 600	d	8.4596	11	SCOPE	Myctophidae	Scopelopsis multipunctatus	65.042		268.334
OP5CE5	BCCE	500 - 600	d	8.4596	11	SCOPE	Myctophidae	Scopelopsis multipunctatus	62.054		234.102
OP5CE5	BCCE	500 - 600	d	8.4596	11	SCOPE	Myctophidae	Scopelopsis multipunctatus	60.102		213.365
OP5CE5	BCCE	500 - 600	d	8.4596	11	SCOPE	Myctophidae	Scopelopsis multipunctatus	64.038		256.49
OP5CE5	BCCE	500 - 600	d	8.4596	11	HATCH	Sternoptychidae	Sternoptyx Diaphana	23.92		43.1404
OP5CE5	BCCE	500 - 600	d	8.4596	11	HATCH	Sternoptychidae	Sternoptyx Diaphana	26.474		57.7617
OP5CE5	BCCE	500 - 600	d	8.4596	11	HATCH	Sternoptychidae	Sternoptyx Diaphana	24.277		45.0188
OP5CE5	BCCE	500 - 600	d	8.4596	11	HATCH	Sternoptychidae	Sternoptyx Diaphana	34.416		122.871
OP5CE5	BCCE	500 - 600	d	8.4596	11	HATCH	Sternoptychidae	Sternoptyx Diaphana	18.279		19.8987
OP5CE5	BCCE	500 - 600	d	8.4596	11	HATCH	Sternoptychidae	Sternoptyx Diaphana	19.339		23.4023
OP5CE5	BCCE	500 - 600	d	8.4596	11	HATCH	Sternoptychidae	Sternoptyx Diaphana	36.513		145.663
OP5CE5	BCCE	500 - 600	d	8.4596	11	HATCH	Sternoptychidae	Sternoptyx Diaphana	30.647		88.0088
OP5CE5	BCCE	500 - 600	d	8.4596	11	HATCH	Sternoptychidae	Sternoptyx Diaphana	25.174		49.9721
OP5CE5	BCCE	500 - 600	d	8.4596	11	HATCH	Sternoptychidae	Sternoptyx Diaphana	19.283		23.2079
OP5CE5	BCCE	500 - 600	d	8.4596	11	HATCH	Sternoptychidae	Sternoptyx Diaphana	38.633		171.343
OP3CE4	BCCE	200 - 300	n	13.9728	9	CEPHA	Cephalopod	Unidentified Species	32.482	68.162	1074.49
OP3CE4	BCCE	200 - 300	n	13.9728	9	CEPHA	Cephalopod	Unidentified Species	19.065	43.173	326.109
OP5CE5	BCCE	500 - 600	d	8.4596	11	MYCTO	Myctophidae	Diaphus sp	80.315	89.995	494.889
OP5CE5	BCCE	500 - 600	d	8.4596	11	MYCTO	Myctophidae	Diaphus sp	70.517	79.282	339.263
OP5CE5	BCCE	500 - 600	d	8.4596	11	MYCTO	Myctophidae	Diaphus sp	79.124	87.157	473.891
OP5CE5	BCCE	500 - 600	d	8.4596	11	MYCTO	Myctophidae	Diaphus sp	69.902	77.459	330.748
OP5CE5	BCCE	500 - 600	d	8.4596	11	MYCTO	Myctophidae	Diaphus sp	80.667	90.374	501.21
OP5CE5	BCCE	500 - 600	d	8.4596	11	MYCTO	Myctophidae	Diaphus sp	73.444	80.296	381.762
OP5CE5	BCCE	500 - 600	d	8.4596	11	MYCTO	Myctophidae	Diaphus sp	70.148	79.826	334.137
OP5CE5	BCCE	500 - 600	d	8.4596	11	MYCTO	Myctophidae	Diaphus sp	69.733	78.699	328.432
OP5CE5	BCCE	500 - 600	d	8.4596	11	MYCTO	Myctophidae	Diaphus sp	66.833	73.596	290.343
OP5CE5	BCCE	500 - 600	d	8.4596	11	MYCTO	Myctophidae	Diaphus sp	74.468	85.159	397.415
OP5CE5	BCCE	500 - 600	d	8.4596	11	MYCTO	Myctophidae	Diaphus sp	84.806	94.481	579.538
OP5CE5	BCCE	500 - 600	d	8.4596	11	MYCTO	Myctophidae	Diaphus sp	65.069	72.411	268.658
OP5CE5	BCCE	500 - 600	d	8.4596	11	MYCTO	Myctophidae	Diaphus sp	67.542	73.23	299.372
OP5CE5	BCCE	500 - 600	d	8.4596	11	MYCTO	Myctophidae	Diaphus sp	78.628	88.381	465.321
OP5CE5	BCCE	500 - 600	d	8.4596	11	MYCTO	Myctophidae	Diaphus sp	77.535	87.208	446.797
OP5CE5	BCCE	500 - 600	d	8.4596	11	MYCTO	Myctophidae	Diaphus sp	74.314	81.726	395.034
OP5CE5	BCCE	500 - 600	d	8.4596	11	MYCTO	Myctophidae	Diaphus sp	70.544	79.619	339.64
OP5CE5	BCCE	500 - 600	d	8.4596	11	MYCTO	Myctophidae	Diaphus sp	68.602	76.41	313.211
OP5CE5	BCCE	500 - 600	d	8.4596	11	MYCTO	Myctophidae	Diaphus sp	80.557	90.944	499.229
OP5CE5	BCCE	500 - 600	d	8.4596	11	MYCTO	Myctophidae	Diaphus sp	76.114	85.607	423.446
OP5CE5	BCCE	500 - 600	d	8.4596	11	MYCTO	Myctophidae	Diaphus sp	69.579	77.874	326.332
OP5CE5	BCCE	500 - 600	d	8.4596	11	MYCTO	Myctophidae	Diaphus sp	70.406	78.898	337.716
OP5CE5	BCCE	500 - 600	d	8.4596	11	MYCTO	Myctophidae	Diaphus sp	67.308	74.156	296.372
OP5CE5	BCCE	500 - 600	d	8.4596	11	MYCTO	Myctophidae	Diaphus sp	73.704	83.39	385.698
OP5CE5	BCCE	500 - 600	d	8.4596	11	MYCTO	Myctophidae	Diaphus sp	75.37	85.048	411.546
OP5CE5	BCCE	500 - 600	d	8.4596	11	MYCTO	Myctophidae	Diaphus sp	71.183	79.017	348.645
OP5CE5	BCCE	500 - 600	d	8.4596	11	MYCTO	Myctophidae	Diaphus sp	72.282	79.833	364.496
OP5CE5	BCCE	500 - 600	d	8.4596	11	MYCTO	Myctophidae	Diaphus sp	68.543	75.85	312.43
OP5CE5	BCCE	500 - 600	d	8.4596	11	MYCTO	Myctophidae	Diaphus sp	61.648	68.967	229.685
OP5CE5	BCCE	500 - 600	d	8.4596	11	MYCTO	Myctophidae	Diaphus sp	73.232	80.537	378.573
OP5CE5	BCCE	500 - 600	d	8.4596	11	MYCTO	Myctophidae	Diaphus sp	67.547	75.339	299.436
OP5CE5	BCCE	500 - 600	d	8.4596	11	MYCTO	Myctophidae	Diaphus sp	72.986	81.737	374.894
OP5CE5	BCCE	500 - 600	d	8.4596	11	MYCTO	Myctophidae	Diaphus sp	69.714	77.495	328.173
OP5CE5	BCCE	500 - 600	d	8.4596	11	MYCTO	Myctophidae	Diaphus sp	65.18	72.5	269.99
OP5CE5	BCCE	500 - 600	d	8.4596	11	MYCTO	Myctophidae	Diaphus sp	73.971	81.279	389.766
OP5CE5	BCCE	500 - 600	d	8.4596	11	MYCTO	Myctophidae	Diaphus sp	82.484	90.783	534.679
OP5CE5	BCCE	500 - 600	d	8.4596	11	MYCTO	Myctophidae	Diaphus sp	83.192	92.404	548.106
OP5CE5	BCCE	500 - 600	d	8.4596	11	MYCTO	Myctophidae	Diaphus sp	81.226	91.281	511.355
OP5CE5	BCCE	500 - 600	d	8.4596	11	MYCTO	Myctophidae	Diaphus sp	79.327	88.84	477.428
OP5CE5	BCCE	500 - 600	d	8.4596	11	MYCTO	Myctophidae	Diaphus sp	65.528	73.346	274.194
OP5CE5	BCCE	500 - 600	d	8.4596	11	MYCTO	Myctophidae	Diaphus sp	76.253	85.692	425.694
OP5CE5	BCCE	500 - 600	d	8.4596	11	MYCTO	Myctophidae	Diaphus sp	66.361	74.39	284.432
OP5CE5	BCCE	500 - 600	d	8.4596	11	MYCTO	Myctophidae	Diaphus sp	74.655	82.459	400.318
OP5CE5	BCCE	500 - 600	d	8.4596	11	MYCTO	Myctophidae	Diaphus sp	46.316	52.578	100.17
OP5CE5	BCCE	500 - 600	d	8.4596	11	MYCTO	Myctophidae	Diaphus sp	77.359	85.473	443.86
OP5CE5	BCCE	500 - 600	d	8.4596	11	MYCTO	Myctophidae	Diaphus sp	74.915	83.138	404.377
OP5CE5	BCCE	500 - 600	d	8.4596	11	MYCTO	Myctophidae	Diaphus sp	74.143	81.297	392.402
OP5CE5	BCCE	500 - 600	d	8.4596	11	MYCTO	Myctophidae	Diaphus sp	70.641	74.652	340.997
OP5CE5	BCCE	500 - 600	d	8.4596	11	MYCTO	Myctophidae	Diaphus sp	80.01	87.911	489.455
OP5CE5	BCCE	500 - 600	d	8.4596	11	MYCTO	Myctophidae	Diaphus sp	79.394	86.862	478.599
OP5CE5	BCCE	500 - 600	d	8.4596	11	MYCTO	Myctophidae	Diaphus sp	65.272	70.657	271.097
OP5CE5	BCCE	500 - 600	d	8.4596	11	MYCTO	Myctophidae	Diaphus sp	79.326	87.047	477.41
OP5CE5	BCCE	500 - 600	d	8.4596	11	MYCTO	Myctophidae	Diaphus sp	69.432	77.12	324.335
OP5CE5	BCCE	500 - 600	d	8.4596	11	MYCTO	Myctophidae	Diaphus sp	72.697	80.663	370.603
OP5CE5	BCCE	500 - 600	d	8.4596	11	MYCTO	Myctophidae	Diaphus sp	78.546	87.584	463.914
OP5CE5	BCCE	500 - 600	d	8.4596	11	MYCTO	Myctophidae	Diaphus sp	71.515	79.534	353.385
OP5CE5	BCCE	500 - 600	d	8.4596	11	MYCTO	Myctophidae	Diaphus sp	80.927	90.043	505.912
OP5CE5	BCCE	500 - 600	d	8.4596	11	MYCTO	Myctophidae	Diaphus sp	70.483	76.981	338.789
OP5CE5	BCCE	500 - 600	d	8.4596	11	MYCTO	Myctophidae	Diaphus sp	74.789	82.724	402.406
OP5CE5	BCCE	500 - 600	d	8.4596	11	MYCTO	Myctophidae	Diaphus sp	68.12	74.652	306.867
OP5CE5	BCCE	500 - 600	d	8.4596	11	MYCTO	Myctophidae	Diaphus sp	70.054	77.469	332.839
OP5CE5	BCCE	500 - 600	d	8.4596	11	MYCTO	Myctophidae	Diaphus sp	78.962	86.051	471.081
OP5CE5	BCCE	500 - 600	d	8.4596	11	MYCTO	Myctophidae	Diaphus sp	64.662	71.751	263.81
OP5CE5	BCCE	500 - 600	d	8.4596	11	MYCTO	Myctophidae	Diaphus sp	66.998	75.585	292.428
OP5CE5	BCCE	500 - 600	d	8.4596	11	MYCTO	Myctophidae	Diaphus sp	75.13	84.107	407.754
OP5CE5	BCCE	500 - 600	d	8.4596	11	MYCTO	Myctophidae	Diaphus sp	76.218	85.003	425.127
OP5CE5	BCCE	500 - 600	d	8.4596	11	MYCTO	Myctophidae	Diaphus sp	68.4	78.094	310.542
OP5CE5	BCCE	500 - 600	d	8.4596	11	MYCTO	Myctophidae	Diaphus sp	62.296	66.783	236.762
OP5CE5	BCCE	500 - 600	d	8.4596	11	MYCTO	Myctophidae	Diaphus sp	76.406	83.966	428.177
OP5CE5	BCCE	500 - 600	d	8.4596	11	MYCTO	Myctophidae	Diaphus sp	76.103	83.222	423.268
OP5CE5	BCCE	500 - 600	d	8.4596	11	MYCTO	Myctophidae	Diaphus sp	70.867	78.944	344.173
OP5CE6	BCCE	100 - 500	d	#N/A	11	CEPHA	Cephalopod		28.02	28.02	105.478
OP5CE6	BCCE	100 - 500	d	#N/A	11	CEPHA	Cephalopod		34.019	34.019	175.044
OP5CE6	BCCE	100 - 500	d	#N/A	11	CEPHA	Cephalopod		85.736	85.736	1955.75
OP5CE6	BCCE	100 - 500	d	#N/A	11	CEPHA	Cephalopod		81.155	81.155	1694.52
OP5CE6	BCCE	100 - 500	d	#N/A	11	CEPHA	Cephalopod		41.903	41.903	301.651
OP5CE6	BCCE	100 - 500	d	#N/A	11	CEPHA	Cephalopod		21.734	21.734	54.3369
OP5CE6	BCCE	100 - 500	d	#N/A	11	CEPHA	Cephalopod		35.444	35.444	194.841
OP5CE6	BCCE	100 - 500	d	#N/A	11	CEPHA	Cephalopod		43.899	43.899	340.622
OP5CE6	BCCE	100 - 500	d	#N/A	11	CEPHA	Cephalopod		47.799	47.799	425.388
OP5CE6	BCCE	100 - 500	d	#N/A	11	CEPHA	Cephalopod		45.268	45.268	369.058
OP5CE6	BCCE	100 - 500	d	#N/A	11	MOLLUSC	Mollusc			60.009	29.7059
OP5CE6	BCCE	100 - 500	d	#N/A	11	MOLLUSC	Mollusc			111.244	82.0482
OP5CE6	BCCE	100 - 500	d	#N/A	11	MOLLUSC	Mollusc			122.037	95.5571
OP5CE6	BCCE	100 - 500	d	#N/A	11	MOLLUSC	Mollusc			47.699	20.3575
OP5CE6	BCCE	100 - 500	d	#N/A	11	MOLLUSC	Mollusc			60.368	29.9989
OP5CE6	BCCE	100 - 500	d	#N/A	11	MOLLUSC	Mollusc			41.366	16.1025
OP5CE6	BCCE	100 - 500	d	#N/A	11	MOLLUSC	Mollusc			98.518	67.1776
OP5CE6	BCCE	100 - 500	d	#N/A	11	MOLLUSC	Mollusc			109.931	80.4603
OP5CE6	BCCE	100 - 500	d	#N/A	11	MOLLUSC	Mollusc			117.521	89.8065
OP5CE6	BCCE	100 - 500	d	#N/A	11	MOLLUSC	Mollusc			26.721	7.84327
OP5CE6	BCCE	100 - 500	d	#N/A	11	MOLLUSC	Mollusc			135.159	113.05
OP5CE6	BCCE	100 - 500	d	#N/A	11	MOLLUSC	Mollusc			40.042	15.263
OP5CE6	BCCE	100 - 500	d	#N/A	11	MOLLUSC	Mollusc			189.256	196.753
OP5CE6	BCCE	100 - 500	d	#N/A	11	LCRUST	Decapod		6.088	21.482	5.1411
OP5CE6	BCCE	100 - 500	d	#N/A	11	LCRUST	Decapod		13.322	27.341	12.8146
OP5CE6	BCCE	100 - 500	d	#N/A	11	LCRUST	Decapod		10.644	27.029	12.2696
OP5CE6	BCCE	100 - 500	d	#N/A	11	LCRUST	Decapod		10.726	35.825	35.6609
OP5CE6	BCCE	100 - 500	d	#N/A	11	LCRUST	Decapod		5.957	30.834	20.2044
OP5CE6	BCCE	100 - 500	d	#N/A	11	LCRUST	Decapod		6.093	28.155	14.3204
OP5CE6	BCCE	100 - 500	d	#N/A	11	LCRUST	Decapod		5.943	20.151	4.03516
OP5CE6	BCCE	100 - 500	d	#N/A	11	LCRUST	Decapod		8.727	23.919	7.72305
OP5CE6	BCCE	100 - 500	d	#N/A	11	LCRUST	Decapod		8.138	25.215	9.4313
OP5CE6	BCCE	100 - 500	d	#N/A	11	LCRUST	Decapod		10.749	40.723	57.9365
OP5CE6	BCCE	100 - 500	d	#N/A	11	LCRUST	Decapod		19.07	47.939	107.463
OP5CE6	BCCE	100 - 500	d	#N/A	11	LCRUST	Decapod		5.827	23.307	7.001
OP5CE6	BCCE	100 - 500	d	#N/A	11	LCRUST	Decapod		7.229	20.876	4.61311
OP5CE6	BCCE	100 - 500	d	#N/A	11	LCRUST	Decapod		6.727	22.8	6.44152
OP5CE6	BCCE	100 - 500	d	#N/A	11	LCRUST	Decapod		16.573	54.264	171.825
OP5CE6	BCCE	100 - 500	d	#N/A	11	LCRUST	Decapod		13.601	33.078	26.3624
OP5CE6	BCCE	100 - 500	d	#N/A	11	LCRUST	Decapod		49.11	116.628	3115.1
OP5CE6	BCCE	100 - 500	d	#N/A	11	LCRUST	Decapod		38.376	95.923	1486.04
OP5CE6	BCCE	100 - 500	d	#N/A	11	LCRUST	Decapod		33.442	81.409	798.373
OP5CE6	BCCE	100 - 500	d	#N/A	11	LCRUST	Decapod		22.141	69.52	439.095
OP5CE6	BCCE	100 - 500	d	#N/A	11	LCRUST	Decapod		22.147	83.008	859.402
OP5CE6	BCCE	100 - 500	d	#N/A	11	LCRUST	Decapod		27.893	92.55	1297.65
OP5CE6	BCCE	100 - 500	d	#N/A	11	LCRUST	Decapod		8.494	39.253	50.4064
OP5CE6	BCCE	100 - 500	d	#N/A	11	LCRUST	Decapod		34.591	89.56	1145.9
OP5CE6	BCCE	100 - 500	d	#N/A	11	LCRUST	Decapod		9.998	40.446	56.4582
OP5CE6	BCCE	100 - 500	d	#N/A	11	LCRUST	Decapod		9.927	25.07	9.22756
OP5CE6	BCCE	100 - 500	d	#N/A	11	LCRUST	Decapod		18.638	75.372	596.326
OP5CE6	BCCE	100 - 500	d	#N/A	11	LCRUST	Decapod		7.595	28.654	15.3056
OP5CE6	BCCE	100 - 500	d	#N/A	11	LCRUST	Decapod		6.605	29.33	16.7186
OP5CE6	BCCE	100 - 500	d	#N/A	11	LCRUST	Decapod		9.319	32.192	23.7865
OP5CE6	BCCE	100 - 500	d	#N/A	11	LCRUST	Decapod		8.196	29.995	18.2001
OP5CE6	BCCE	100 - 500	d	#N/A	11	LCRUST	Decapod		12.445	34.315	30.2947
OP5CE6	BCCE	100 - 500	d	#N/A	11	LCRUST	Decapod		9.757	28.593	15.1826
OP5CE6	BCCE	100 - 500	d	#N/A	11	LCRUST	Decapod		9.185	38.769	48.0928
OP5CE6	BCCE	100 - 500	d	#N/A	11	LCRUST	Decapod		11.05	26.907	12.0612
OP5CE6	BCCE	100 - 500	d	#N/A	11	LCRUST	Decapod		7.58	20.398	4.22569
OP5CE6	BCCE	100 - 500	d	#N/A	11	LCRUST	Decapod		5.871	22.372	5.99544
OP5CE6	BCCE	100 - 500	d	#N/A	11	LCRUST	Decapod		5.957	24.074	7.9143
OP5CE6	BCCE	100 - 500	d	#N/A	11	LCRUST	Decapod		9.757	46.163	93.1474
OP5CE6	BCCE	100 - 500	d	#N/A	11	LCRUST	Decapod		7.64	23.573	7.30843
OP5CE6	BCCE	100 - 500	d	#N/A	11	LCRUST	Decapod		7.841	21.548	5.20117
OP5CE6	BCCE	100 - 500	d	#N/A	11	LCRUST	Decapod		8.251	26.915	12.0747
OP5CE6	BCCE	100 - 500	d	#N/A	11	LCRUST	Decapod		6.527	25.49	9.82679
OP5CE6	BCCE	100 - 500	d	#N/A	11	LCRUST	Decapod		8.251	30.337	18.9985
OP5CE6	BCCE	100 - 500	d	#N/A	11	LCRUST	Decapod		10.091	30.853	20.2516
OP5CE6	BCCE	100 - 500	d	#N/A	11	LCRUST	Decapod		13.688	34.477	30.8399
OP5CE6	BCCE	100 - 500	d	#N/A	11	LCRUST	Decapod		19.821	55.126	182.392
OP5CE6	BCCE	100 - 500	d	#N/A	11	LCRUST	Decapod		24.835	88.901	1114.29
OP5CE6	BCCE	100 - 500	d	#N/A	11	LCRUST	Decapod		21.583	58.251	224.747
OP5CE6	BCCE	100 - 500	d	#N/A	11	LCRUST	Decapod		25.568	79.631	734.324
OP5CE6	BCCE	100 - 500	d	#N/A	11	LCRUST	Decapod		21.027	62.903	300.648
OP5CE6	BCCE	100 - 500	d	#N/A	11	LCRUST	Decapod		13.799	53.633	164.38
OP5CE6	BCCE	100 - 500	d	#N/A	11	LCRUST	Decapod		21.714	55.588	188.249
OP5CE6	BCCE	100 - 500	d	#N/A	11	LCRUST	Decapod		6.253	23.755	7.52443
OP5CE6	BCCE	100 - 500	d	#N/A	11	LCRUST	Decapod		17.82	52.063	146.888
OP6CE2	BCCE	400 - 500	n	9.9162	9	LCRUST	Decapod		11.019	35.886	35.8914
OP6CE2	BCCE	400 - 500	n	9.9162	9	LCRUST	Decapod		16.924	59.258	239.818
OP6CE2	BCCE	400 - 500	n	9.9162	9	LCRUST	Decapod		19.602	65.689	354.27
OP6CE2	BCCE	400 - 500	n	9.9162	9	LCRUST	Decapod		26.964	79.629	734.254
OP6CE2	BCCE	400 - 500	n	9.9162	9	LCRUST	Decapod		14.581	64.163	324.098
OP6CE2	BCCE	400 - 500	n	9.9162	9	LCRUST	Decapod		17.684	58.731	231.841
OP6CE2	BCCE	400 - 500	n	9.9162	9	LCRUST	Decapod		7.282	26.257	10.9944
OP6CE2	BCCE	400 - 500	n	9.9162	9	LCRUST	Decapod		7.207	26.054	10.6759
OP6CE2	BCCE	400 - 500	n	9.9162	9	LCRUST	Decapod		11.359	28.851	15.7079
OP6CE2	BCCE	400 - 500	n	9.9162	9	LCRUST	Decapod		17.703	71.004	475.661
OP6CE2	BCCE	400 - 500	n	9.9162	9	LCRUST	Decapod		13.692	58.793	232.769
OP6CE2	BCCE	400 - 500	n	9.9162	9	LCRUST	Decapod		7.422	24.766	8.81092
OP6CE2	BCCE	400 - 500	n	9.9162	9	LCRUST	Decapod		6.201	27.707	13.4765
OP6CE2	BCCE	400 - 500	n	9.9162	9	LCRUST	Decapod		5.938	23.844	7.63175
OP6CE2	BCCE	400 - 500	n	9.9162	9	MYCTO	Myctophidae	Unidentified Species	77.839		451.9
OP6CE2	BCCE	400 - 500	n	9.9162	9	MYCTO	Myctophidae	Unidentified Species	77.044		438.636
OP6CE2	BCCE	400 - 500	n	9.9162	9	MYCTO	Myctophidae	Unidentified Species	61.646		229.663
OP6CE2	BCCE	400 - 500	n	9.9162	9	MYCTO	Myctophidae	Unidentified Species	79.524		480.877
OP6CE2	BCCE	400 - 500	n	9.9162	9	MYCTO	Myctophidae	Unidentified Species	56.039		174.143
OP6CE2	BCCE	400 - 500	n	9.9162	9	MYCTO	Myctophidae	Unidentified Species	79.707		484.095
OP6CE2	BCCE	400 - 500	n	9.9162	9	MYCTO	Myctophidae	Unidentified Species	66.491		286.052
OP6CE2	BCCE	400 - 500	n	9.9162	9	MYCTO	Myctophidae	Unidentified Species	71.922		359.253
OP6CE2	BCCE	400 - 500	n	9.9162	9	MYCTO	Myctophidae	Unidentified Species	66.306		283.749
OP6CE2	BCCE	400 - 500	n	9.9162	9	MYCTO	Myctophidae	Unidentified Species	65.852		278.147
OP6CE2	BCCE	400 - 500	n	9.9162	9	MYCTO	Myctophidae	Unidentified Species	78.733		467.127
OP6CE2	BCCE	400 - 500	n	9.9162	9	MYCTO	Myctophidae	Unidentified Species	60.593		218.463
OP6CE2	BCCE	400 - 500	n	9.9162	9	MYCTO	Myctophidae	Unidentified Species	67.825		303.027
OP6CE2	BCCE	400 - 500	n	9.9162	9	MYCTO	Myctophidae	Unidentified Species	73.124		376.955
OP6CE2	BCCE	400 - 500	n	9.9162	9	MYCTO	Myctophidae	Unidentified Species	61.898		232.399
OP6CE2	BCCE	400 - 500	n	9.9162	9	MYCTO	Myctophidae	Unidentified Species	66.652		288.067
OP6CE2	BCCE	400 - 500	n	9.9162	9	MYCTO	Myctophidae	Unidentified Species	70.873		344.257
OP6CE2	BCCE	400 - 500	n	9.9162	9	MYCTO	Myctophidae	Unidentified Species	69.738		328.501
OP6CE2	BCCE	400 - 500	n	9.9162	9	MYCTO	Myctophidae	Unidentified Species	64.774		265.138
OP6CE2	BCCE	400 - 500	n	9.9162	9	MYCTO	Myctophidae	Unidentified Species	83.546		554.902
OP6CE2	BCCE	400 - 500	n	9.9162	9	MYCTO	Myctophidae	Unidentified Species	59.552		207.748
OP6CE2	BCCE	400 - 500	n	9.9162	9	MYCTO	Myctophidae	Unidentified Species	72.138		362.393
OP6CE2	BCCE	400 - 500	n	9.9162	9	MYCTO	Myctophidae	Unidentified Species	69.126		320.204
OP6CE2	BCCE	400 - 500	n	9.9162	9	MYCTO	Myctophidae	Unidentified Species	66.674		288.343
OP6CE2	BCCE	400 - 500	n	9.9162	9	MYCTO	Myctophidae	Unidentified Species	79.578		481.825
OP6CE2	BCCE	400 - 500	n	9.9162	9	MYCTO	Myctophidae	Unidentified Species	71.432		352.196
OP6CE2	BCCE	400 - 500	n	9.9162	9	MYCTO	Myctophidae	Unidentified Species	77.437		445.16
OP6CE2	BCCE	400 - 500	n	9.9162	9	MYCTO	Myctophidae	Unidentified Species	80.213		493.067
OP6CE2	BCCE	400 - 500	n	9.9162	9	MYCTO	Myctophidae	Unidentified Species	79.218		475.526
OP6CE2	BCCE	400 - 500	n	9.9162	9	MYCTO	Myctophidae	Unidentified Species	58.692		199.161
OP6CE2	BCCE	400 - 500	n	9.9162	9	MYCTO	Myctophidae	Unidentified Species	78.093		456.193
OP6CE2	BCCE	400 - 500	n	9.9162	9	MYCTO	Myctophidae	Unidentified Species	81.227		511.374
OP6CE2	BCCE	400 - 500	n	9.9162	9	MYCTO	Myctophidae	Unidentified Species	80.081		490.716
OP6CE2	BCCE	400 - 500	n	9.9162	9	MYCTO	Myctophidae	Unidentified Species	65.589		274.936
OP6CE2	BCCE	400 - 500	n	9.9162	9	MYCTO	Myctophidae	Unidentified Species	77.704		449.629
OP6CE2	BCCE	400 - 500	n	9.9162	9	MYCTO	Myctophidae	Unidentified Species	82.67		538.185
OP6CE2	BCCE	400 - 500	n	9.9162	9	MYCTO	Myctophidae	Unidentified Species	71.053		346.801
OP6CE2	BCCE	400 - 500	n	9.9162	9	MYCTO	Myctophidae	Unidentified Species	74.02		390.516
OP6CE2	BCCE	400 - 500	n	9.9162	9	MYCTO	Myctophidae	Unidentified Species	69.946		331.352
OP6CE2	BCCE	400 - 500	n	9.9162	9	MYCTO	Myctophidae	Unidentified Species	58.267		195.004
OP6CE2	BCCE	400 - 500	n	9.9162	9	MYCTO	Myctophidae	Unidentified Species	65.596		275.021
OP3CE4	BCCE	200 - 300	n	13.9728	9	CEPHA	Cephalopod	Unidentified Species	11.635	23.773	68.6718
OP3CE5	BCCE	100 - 200	n	16.5273	9	CEPHA	Cephalopod			54.142	588.954
OP3CE5	BCCE	100 - 200	n	16.5273	9	CEPHA	Cephalopod			26.18	88.3369
OP3CE5	BCCE	100 - 200	n	16.5273	9	CEPHA	Cephalopod		26.985	26.985	95.6057
OP3CE6	BCCE	0 - 100	n	19.6824	9	CEPHA	Cephalopod		21.745	42.922	321.182
OP5CE3	BCCE	700 - 800	d	6.4918	11	CEPHA	Cephalopod		70.761	70.761	1184.77
OP6CE2	BCCE	400 - 500	n	9.9162	9	SLEND	Gonostomatidae	Cyclothone sp	26.745		0.00442085
OP6CE2	BCCE	400 - 500	n	9.9162	9	SLEND	Gonostomatidae	Cyclothone sp	23.903		0.00317554
OP6CE2	BCCE	400 - 500	n	9.9162	9	SLEND	Gonostomatidae	Cyclothone sp	27.874		0.0049933
OP6CE2	BCCE	400 - 500	n	9.9162	9	SLEND	Gonostomatidae	Cyclothone sp	26.666		0.0043825
OP6CE2	BCCE	400 - 500	n	9.9162	9	SLEND	Gonostomatidae	Cyclothone sp	18.819		0.00157023
OP6CE2	BCCE	400 - 500	n	9.9162	9	SLEND	Gonostomatidae	Cyclothone sp	15.878		0.000951962
OP6CE2	BCCE	400 - 500	n	9.9162	9	SLEND	Gonostomatidae	Cyclothone sp	15.222		0.000840727
OP6CE2	BCCE	400 - 500	n	9.9162	9	SLEND	Gonostomatidae	Cyclothone sp	16.101		0.000991876
OP6CE2	BCCE	400 - 500	n	9.9162	9	SLEND	Gonostomatidae	Cyclothone sp	18.505		0.00149432
OP6CE2	BCCE	400 - 500	n	9.9162	9	SLEND	Gonostomatidae	Cyclothone sp	16.082		0.000988433
OP6CE2	BCCE	400 - 500	n	9.9162	9	SLEND	Gonostomatidae	Cyclothone sp	18.986		0.00161162
OP6CE2	BCCE	400 - 500	n	9.9162	9	SLEND	Gonostomatidae	Cyclothone sp	21.683		0.00238313
OP6CE2	BCCE	400 - 500	n	9.9162	9	SLEND	Gonostomatidae	Cyclothone sp	19.329		0.00169888
OP6CE2	BCCE	400 - 500	n	9.9162	9	SLEND	Gonostomatidae	Cyclothone sp	29.825		0.00609418
OP6CE2	BCCE	400 - 500	n	9.9162	9	SLEND	Gonostomatidae	Cyclothone sp	18.86		0.00158032
OP6CE2	BCCE	400 - 500	n	9.9162	9	SLEND	Gonostomatidae	Cyclothone sp	20.774		0.00210074
OP6CE2	BCCE	400 - 500	n	9.9162	9	SLEND	Gonostomatidae	Cyclothone sp	19.306		0.00169293
OP6CE2	BCCE	400 - 500	n	9.9162	9	SLEND	Gonostomatidae	Cyclothone sp	19.822		0.00182968
OP6CE2	BCCE	400 - 500	n	9.9162	9	SLEND	Gonostomatidae	Cyclothone sp	20.128		0.00191412
OP6CE2	BCCE	400 - 500	n	9.9162	9	SLEND	Gonostomatidae	Cyclothone sp	15.584		0.00090098
OP6CE2	BCCE	400 - 500	n	9.9162	9	SLEND	Gonostomatidae	Cyclothone sp	17.889		0.00135251
OP6CE2	BCCE	400 - 500	n	9.9162	9	SLEND	Gonostomatidae	Cyclothone sp	16.394		0.00104598
OP6CE2	BCCE	400 - 500	n	9.9162	9	SLEND	Gonostomatidae	Cyclothone sp	14.674		0.000754677
OP6CE2	BCCE	400 - 500	n	9.9162	9	SLEND	Gonostomatidae	Cyclothone sp	18.811		0.00156826
OP6CE2	BCCE	400 - 500	n	9.9162	9	SLEND	Gonostomatidae	Cyclothone sp	23.705		0.0030987
OP6CE2	BCCE	400 - 500	n	9.9162	9	SLEND	Gonostomatidae	Cyclothone sp	20.772		0.00210015
OP6CE2	BCCE	400 - 500	n	9.9162	9	SLEND	Gonostomatidae	Cyclothone sp	20.35		0.00197696
OP6CE2	BCCE	400 - 500	n	9.9162	9	SLEND	Gonostomatidae	Cyclothone sp	15.479		0.00088322
OP6CE2	BCCE	400 - 500	n	9.9162	9	SLEND	Gonostomatidae	Cyclothone sp	20.671		0.00207021
OP6CE2	BCCE	400 - 500	n	9.9162	9	SLEND	Gonostomatidae	Cyclothone sp	17.608		0.0012909
OP6CE2	BCCE	400 - 500	n	9.9162	9	SLEND	Gonostomatidae	Cyclothone sp	13.969		0.000652811
OP6CE2	BCCE	400 - 500	n	9.9162	9	SLEND	Gonostomatidae	Cyclothone sp	21.326		0.00226942
OP6CE2	BCCE	400 - 500	n	9.9162	9	SLEND	Gonostomatidae	Cyclothone sp	19.524		0.00174985
OP6CE2	BCCE	400 - 500	n	9.9162	9	SLEND	Gonostomatidae	Cyclothone sp	22.744		0.00274314
OP6CE2	BCCE	400 - 500	n	9.9162	9	SLEND	Gonostomatidae	Cyclothone sp	24.876		0.00357149
OP6CE2	BCCE	400 - 500	n	9.9162	9	SLEND	Gonostomatidae	Cyclothone sp	18.71		0.00154359
OP6CE2	BCCE	400 - 500	n	9.9162	9	SLEND	Gonostomatidae	Cyclothone sp	19.454		0.00173144
OP6CE2	BCCE	400 - 500	n	9.9162	9	SLEND	Gonostomatidae	Cyclothone sp	25.184		0.00370329
OP6CE2	BCCE	400 - 500	n	9.9162	9	SLEND	Gonostomatidae	Cyclothone sp	19.867		0.00184194
OP6CE2	BCCE	400 - 500	n	9.9162	9	SLEND	Gonostomatidae	Cyclothone sp	23.062		0.00285764
OP6CE2	BCCE	400 - 500	n	9.9162	9	SLEND	Gonostomatidae	Cyclothone sp	29.884		0.00612975
OP6CE2	BCCE	400 - 500	n	9.9162	9	SLEND	Gonostomatidae	Cyclothone sp	20.608		0.00205169
OP6CE2	BCCE	400 - 500	n	9.9162	9	SLEND	Gonostomatidae	Cyclothone sp	18.954		0.00160363
OP6CE2	BCCE	400 - 500	n	9.9162	9	SLEND	Gonostomatidae	Cyclothone sp	29.088		0.00566126
OP6CE2	BCCE	400 - 500	n	9.9162	9	SLEND	Gonostomatidae	Cyclothone sp	25.279		0.00374459
OP6CE2	BCCE	400 - 500	n	9.9162	9	SLEND	Gonostomatidae	Cyclothone sp	19.078		0.00163473
OP6CE2	BCCE	400 - 500	n	9.9162	9	SLEND	Gonostomatidae	Cyclothone sp	20.039		0.0018893
OP6CE2	BCCE	400 - 500	n	9.9162	9	SLEND	Gonostomatidae	Cyclothone sp	20.167		0.00192506
OP6CE2	BCCE	400 - 500	n	9.9162	9	SLEND	Gonostomatidae	Cyclothone sp	17.775		0.00132729
OP6CE2	BCCE	400 - 500	n	9.9162	9	SLEND	Gonostomatidae	Cyclothone sp	22.672		0.00271765
OP6CE2	BCCE	400 - 500	n	9.9162	9	SLEND	Gonostomatidae	Cyclothone sp	22.43		0.0026331
OP6CE2	BCCE	400 - 500	n	9.9162	9	SLEND	Gonostomatidae	Cyclothone sp	20.457		0.00200773
OP6CE2	BCCE	400 - 500	n	9.9162	9	SLEND	Gonostomatidae	Cyclothone sp	16.754		0.00111508
OP6CE2	BCCE	400 - 500	n	9.9162	9	SLEND	Gonostomatidae	Cyclothone sp	16.802		0.00112451
OP6CE2	BCCE	400 - 500	n	9.9162	9	SLEND	Gonostomatidae	Cyclothone sp	22.189		0.00255065
OP6CE2	BCCE	400 - 500	n	9.9162	9	HATCH	Sternoptychidae	Argyropelecus gigas	65.359	82.232	410.49
OP6CE2	BCCE	400 - 500	n	9.9162	9	MYCTO	Myctophidae	Diaphus metopoclampus	120.71	138.03	1614.38
OP6CE2	BCCE	400 - 500	n	9.9162	9	MYCFATTY	Myctophidae	Electrona risso	61.78	71.86	231.115
OP6CE2	BCCE	400 - 500	n	9.9162	9	MYCTO	Myctophidae	Unidentified Species	18.977	21.212	7.51976
OP6CE2	BCCE	400 - 500	n	9.9162	9	MYCTO	Myctophidae	Unidentified Species	18.18	20.84	6.63941
OP6CE2	BCCE	400 - 500	n	9.9162	9	LARV	Chaunacidae	Chaunax sp	26.89	34.416	0.0897598
OP6CE2	BCCE	400 - 500	n	9.9162	9	FISH	Caristiidae	Platyberyx rhyton	102.058	117.902	8.1
OP5CE4	BCCE	500 - 600	d	8.4596	11	CEPHA	Cephalopod		131.297	131.297	5950.95
OP6CE3	BCCE	300 - 400	n	11.762	9	LCRUST	Decapod		13.561	59.826	248.64
OP6CE3	BCCE	300 - 400	n	11.762	9	LCRUST	Decapod		16.639	55.215	183.51
OP6CE3	BCCE	300 - 400	n	11.762	9	LCRUST	Decapod		12.662	46.017	92.0367
OP6CE3	BCCE	300 - 400	n	11.762	9	LCRUST	Decapod		9.608	24.371	8.29046
OP6CE3	BCCE	300 - 400	n	11.762	9	LCRUST	Decapod		8.718	25.879	10.4069
OP6CE3	BCCE	300 - 400	n	11.762	9	LCRUST	Decapod		10.976	28.074	14.165
OP6CE3	BCCE	300 - 400	n	11.762	9	LCRUST	Decapod		12.333	41.323	61.2361
OP6CE3	BCCE	300 - 400	n	11.762	9	LCRUST	Decapod		9.911	30.192	18.6569
OP6CE3	BCCE	300 - 400	n	11.762	9	LCRUST	Decapod		8.67	22.411	6.03512
OP6CE3	BCCE	300 - 400	n	11.762	9	LCRUST	Decapod		6.191	21.616	5.26361
OP6CE3	BCCE	300 - 400	n	11.762	9	LCRUST	Decapod		12.187	50.747	133.315
OP6CE3	BCCE	300 - 400	n	11.762	9	LCRUST	Decapod		7.264	28.771	15.5436
OP6CE3	BCCE	300 - 400	n	11.762	9	LCRUST	Decapod		6.366	24.056	7.89191
OP6CE3	BCCE	300 - 400	n	11.762	9	LCRUST	Decapod		7.998	24.769	8.81497
OP6CE3	BCCE	300 - 400	n	11.762	9	LCRUST	Decapod		12.708	49.106	117.711
OP6CE3	BCCE	300 - 400	n	11.762	9	LCRUST	Decapod		4.669	20.511	4.31503
OP6CE3	BCCE	300 - 400	n	11.762	9	LCRUST	Decapod		8.215	23.73	7.49448
OP6CE3	BCCE	300 - 400	n	11.762	9	LCRUST	Decapod		9.015	37.415	42.0352
OP6CE3	BCCE	300 - 400	n	11.762	9	LCRUST	Decapod		13.33	54.996	180.769
OP6CE3	BCCE	300 - 400	n	11.762	9	LCRUST	Decapod		11.309	27.063	12.3281
OP6CE3	BCCE	300 - 400	n	11.762	9	LCRUST	Decapod		8.491	30.732	19.9524
OP6CE3	BCCE	300 - 400	n	11.762	9	LCRUST	Decapod		8.228	28.501	14.9984
OP6CE3	BCCE	300 - 400	n	11.762	9	LCRUST	Decapod		9.139	23.12	6.79065
OP6CE3	BCCE	300 - 400	n	11.762	9	LCRUST	Decapod		14.613	46.67	97.0813
OP6CE3	BCCE	300 - 400	n	11.762	9	LCRUST	Decapod		9.329	25.485	9.8195
OP6CE3	BCCE	300 - 400	n	11.762	9	LCRUST	Decapod		7.298	28.096	14.2071
OP6CE3	BCCE	300 - 400	n	11.762	9	LCRUST	Decapod		9.65	25.323	9.5852
OP6CE3	BCCE	300 - 400	n	11.762	9	LCRUST	Decapod		8.285	21.871	5.50265
OP6CE3	BCCE	300 - 400	n	11.762	9	LCRUST	Decapod		9.214	26.322	11.0978
OP6CE3	BCCE	300 - 400	n	11.762	9	LCRUST	Decapod		12.869	36.04	36.4782
OP6CE3	BCCE	300 - 400	n	11.762	9	LCRUST	Decapod		6.133	21.648	5.29318
OP6CE3	BCCE	300 - 400	n	11.762	9	LCRUST	Decapod		10.697	38.765	48.0741
OP6CE3	BCCE	300 - 400	n	11.762	9	LCRUST	Decapod		11.023	28.02	14.0621
OP6CE3	BCCE	300 - 400	n	11.762	9	LCRUST	Decapod		11.26	26.612	11.568
OP6CE3	BCCE	300 - 400	n	11.762	9	LCRUST	Decapod		9.187	26.203	10.909
OP6CE3	BCCE	300 - 400	n	11.762	9	LCRUST	Decapod		6.71	27.651	13.3736
OP6CE3	BCCE	300 - 400	n	11.762	9	LCRUST	Decapod		10.406	24.314	8.21727
OP6CE3	BCCE	300 - 400	n	11.762	9	LCRUST	Decapod		7.736	28.888	15.7843
OP6CE3	BCCE	300 - 400	n	11.762	9	LCRUST	Decapod		12.895	42.874	70.4057
OP6CE3	BCCE	300 - 400	n	11.762	9	LCRUST	Decapod		9.931	31.408	21.6661
OP6CE3	BCCE	300 - 400	n	11.762	9	LCRUST	Decapod		8.134	25.881	10.4099
OP6CE3	BCCE	300 - 400	n	11.762	9	LCRUST	Decapod		7.629	23.393	7.09933
OP6CE3	BCCE	300 - 400	n	11.762	9	LCRUST	Decapod		7.298	23.3	6.99304
OP6CE3	BCCE	300 - 400	n	11.762	9	LCRUST	Decapod		8.134	27.959	13.9465
OP6CE3	BCCE	300 - 400	n	11.762	9	LCRUST	Decapod		7.877	27.731	13.5207
OP6CE3	BCCE	300 - 400	n	11.762	9	LCRUST	Decapod		11.444	28.086	14.188
OP6CE3	BCCE	300 - 400	n	11.762	9	LCRUST	Decapod		9.842	25.704	10.1429
OP6CE3	BCCE	300 - 400	n	11.762	9	LCRUST	Decapod		9.853	25.804	10.2931
OP5CE4	BCCE	500 - 600	d	8.4596	11	CEPHA	Cephalopod		35.272	35.272	192.381
OP6CE3	BCCE	300 - 400	n	11.762	9	MYCTO	Myctophidae	Diaphus sp	50.275	57.893	127.09
OP6CE3	BCCE	300 - 400	n	11.762	9	MYCTO	Myctophidae	Diaphus sp	66.236	74.758	282.88
OP6CE3	BCCE	300 - 400	n	11.762	9	MYCTO	Myctophidae	Diaphus sp	72.167	84.772	362.816
OP6CE3	BCCE	300 - 400	n	11.762	9	MYCTO	Myctophidae	Diaphus sp	57.207	65.334	184.887
OP6CE3	BCCE	300 - 400	n	11.762	9	MYCTO	Myctophidae	Diaphus sp	55.069	62.264	165.539
OP6CE3	BCCE	300 - 400	n	11.762	9	MYCTO	Myctophidae	Diaphus sp	73.698	84.051	385.606
OP6CE3	BCCE	300 - 400	n	11.762	9	MYCTO	Myctophidae	Diaphus sp	55.746	62.052	171.514
OP6CE3	BCCE	300 - 400	n	11.762	9	MYCTO	Myctophidae	Diaphus sp	69.915	78.274	330.926
OP6CE3	BCCE	300 - 400	n	11.762	9	MYCTO	Myctophidae	Diaphus sp	62.541	69.686	239.474
OP6CE3	BCCE	300 - 400	n	11.762	9	MYCTO	Myctophidae	Diaphus sp	74.478	82.727	397.57
OP6CE3	BCCE	300 - 400	n	11.762	9	MYCTO	Myctophidae	Diaphus sp	65.373	72.917	272.317
OP6CE3	BCCE	300 - 400	n	11.762	9	MYCTO	Myctophidae	Diaphus sp	50.091	57.283	125.745
OP6CE3	BCCE	300 - 400	n	11.762	9	MYCTO	Myctophidae	Diaphus sp	83.221	93.217	548.661
OP6CE3	BCCE	300 - 400	n	11.762	9	MYCTO	Myctophidae	Diaphus sp	58.802	65.77	200.246
OP6CE3	BCCE	300 - 400	n	11.762	9	MYCTO	Myctophidae	Diaphus sp	83.952	95.134	562.764
OP6CE3	BCCE	300 - 400	n	11.762	9	MYCTO	Myctophidae	Diaphus sp	53.699	59.303	153.869
OP6CE3	BCCE	300 - 400	n	11.762	9	MYCTO	Myctophidae	Diaphus sp	60.362	67.118	216.055
OP6CE3	BCCE	300 - 400	n	11.762	9	MYCTO	Myctophidae	Diaphus sp	66.838	74.689	290.406
OP6CE3	BCCE	300 - 400	n	11.762	9	MYCTO	Myctophidae	Diaphus sp	39.685	45.334	63.9737
OP6CE3	BCCE	300 - 400	n	11.762	9	MYCTO	Myctophidae	Diaphus sp	63.349	75.937	248.563
OP6CE3	BCCE	300 - 400	n	11.762	9	MYCTO	Myctophidae	Diaphus sp	68.531	75.579	312.271
OP6CE3	BCCE	300 - 400	n	11.762	9	MYCFATTY	Myctophidae	Electrona risso	32.147	36.525	34.7144
OP6CE3	BCCE	300 - 400	n	11.762	9	MYCFATTY	Myctophidae	Electrona risso	37.513	42.246	54.333
OP6CE3	BCCE	300 - 400	n	11.762	9	FISH	Phosichthyidae	Ichthyococcus ovatus	18.241	23.362	3.97627
OP6CE3	BCCE	300 - 400	n	11.762	9	FISH	Phosichthyidae	Vinciguerria poweriae	31.376	37.367	35.4937
OP6CE3	BCCE	300 - 400	n	11.762	9	FISH	Phosichthyidae	Vinciguerria poweriae	31.209	38.827	34.7374
OP6CE3	BCCE	300 - 400	n	11.762	9	FISH	Phosichthyidae	Ichthyococcus ovatus	35.532	40.172	58.6387
OP6CE3	BCCE	300 - 400	n	11.762	9	FISH	Phosichthyidae	Ichthyococcus ovatus	36.38	44.521	64.4949
OP6CE3	BCCE	300 - 400	n	11.762	9	FISH	Phosichthyidae	Ichthyococcus ovatus	39.323	44.968	88.283
OP6CE3	BCCE	300 - 400	n	11.762	9	FISH	Phosichthyidae	Ichthyococcus ovatus	38.512	45.555	81.1613
OP6CE3	BCCE	300 - 400	n	11.762	9	FISH	Phosichthyidae	Ichthyococcus ovatus	47.774	56.128	193.687
OP6CE3	BCCE	300 - 400	n	11.762	9	TOOTH	Anoplogastridae	Anoplogaster cornuta	27.147		0.428393
OP6CE3	BCCE	300 - 400	n	11.762	9	SLEND	Gonostomatidae	Cyclothone sp	33.248	33.248	0.00839219
OP6CE3	BCCE	300 - 400	n	11.762	9	SLEND	Gonostomatidae	Cyclothone sp	24.973	24.973	0.00361266
OP6CE3	BCCE	300 - 400	n	11.762	9	MYCTO	Myctophidae	Lampadena sp	62.43	77.764	238.243
OP6CE3	BCCE	300 - 400	n	11.762	9	MYCTO	Myctophidae	Lampanyctus alatus	110.987	131.051	1265.22
OP6CE3	BCCE	300 - 400	n	11.762	9	MYCTO	Myctophidae	Lampanyctus alatus	93.851	108.852	777.688
OP6CE3	BCCE	300 - 400	n	11.762	9	MYCTO	Myctophidae	Lampanyctus alatus	81.088	90.896	508.838
OP6CE3	BCCE	300 - 400	n	11.762	9	MYCTO	Myctophidae	Lampanyctus alatus	66.811	77.074	290.066
OP6CE3	BCCE	300 - 400	n	11.762	9	MYCTO	Myctophidae	Lampanyctus alatus	99.981	116.46	934.433
OP6CE3	BCCE	300 - 400	n	11.762	9	MYCTO	Myctophidae	Lampanyctus alatus	81.061	92.136	508.347
OP6CE3	BCCE	300 - 400	n	11.762	9	MYCTO	Myctophidae	Lampanyctus alatus	107.623	126.914	1157.11
OP6CE3	BCCE	300 - 400	n	11.762	9	MYCTO	Myctophidae	Lampanyctus alatus	95.183	108.45	810.153
OP6CE3	BCCE	300 - 400	n	11.762	9	MYCTO	Myctophidae	Lampanyctus alatus	98.367	112.528	891.327
OP6CE3	BCCE	300 - 400	n	11.762	9	MYCTO	Myctophidae	Lampanyctus alatus	70.865	82.762	344.145
OP6CE3	BCCE	300 - 400	n	11.762	9	SLEND	Notosudidae	Scopelosaurus sp	36.588	39.081	0.0450094
OP6CE3	BCCE	300 - 400	n	11.762	9	SLEND	Notosudidae	Scopelosaurus sp	37.237	40.307	0.0496549
OP6CE3	BCCE	300 - 400	n	11.762	9	HATCH	Sternoptychidae	Sternoptyx diaphana	20.396	26.262	27.274
OP6CE3	BCCE	300 - 400	n	11.762	9	HATCH	Sternoptychidae	Sternoptyx diaphana	22.58	29.457	36.547
OP6CE3	BCCE	300 - 400	n	11.762	9	MYCTO	Myctophidae	Unidentified Species	21.303	22.945	10.5178
OP6CE3	BCCE	300 - 400	n	11.762	9	MYCTO	Myctophidae	Unidentified Species	32.293	36.743	35.1739
OP6CE3	BCCE	300 - 400	n	11.762	9	FISH	Melamphaidae	Melamphaes simus	41.32	47.539	49.446
OP6CE3	BCCE	300 - 400	n	11.762	9	FISH	Melamphaidae	Melamphaes simus	41.287	48.112	49.3174
OP6CE3	BCCE	300 - 400	n	11.762	9	FISH	Melamphaidae	Melamphaes simus	41.401	48.615	49.7626
OP6CE3	BCCE	300 - 400	n	11.762	9	FISH	Melamphaidae	Melamphaes simus	41.307	48.63	49.3953
OP6CE3	BCCE	300 - 400	n	11.762	9	FISH	Melamphaidae	Melamphaes simus	41.215	48.786	49.0377
OP6CE3	BCCE	300 - 400	n	11.762	9	FISH	Melamphaidae	Melamphaes simus	43.31	51.439	57.6375
OP5CE5	BCCE	500 - 600	d	8.4596	11	CEPHA	Cephalopod		28.984	28.984	115.218
OP5CE5	BCCE	500 - 600	d	8.4596	11	CEPHA	Cephalopod		22.77	22.77	61.3618
OP6CE3	BCCE	300 - 400	n	11.762	9	CEPHA	Cephalopod		20.844	20.844	48.7173
OP6CE5	BCCE	100 - 200	n	16.5273	9	CEPHA	Cephalopod		22.386	22.386	58.6965
OP6CE6	BCCE	0 - 100	n	19.6824	9	CEPHA	Cephalopod		22.081	22.081	56.6312
OP6CE6	BCCE	0 - 100	n	19.6824	9	CEPHA	Cephalopod		20.46	20.46	46.4085
OP6CE4	BCCE	200 - 300	n	13.9728	9	LCRUST	Decapod		5.598	20.969	4.69142
OP6CE4	BCCE	200 - 300	n	13.9728	9	LCRUST	Decapod		5.915	23.434	7.14657
OP6CE4	BCCE	200 - 300	n	13.9728	9	LCRUST	Decapod		6.642	20.384	4.21472
OP6CE4	BCCE	200 - 300	n	13.9728	9	LCRUST	Decapod		4.549	24.415	8.34729
OP6CE4	BCCE	200 - 300	n	13.9728	9	LCRUST	Decapod		11.136	32.102	23.5357
OP6CE4	BCCE	200 - 300	n	13.9728	9	LCRUST	Decapod		7.869	26.977	12.1804
OP6CE4	BCCE	200 - 300	n	13.9728	9	LCRUST	Decapod		5.592	20.131	4.02001
OP6CE4	BCCE	200 - 300	n	13.9728	9	LCRUST	Decapod		6.491	24.616	8.61053
OP6CE4	BCCE	200 - 300	n	13.9728	9	LCRUST	Decapod		4.751	20.355	4.19205
OP6CE4	BCCE	200 - 300	n	13.9728	9	LCRUST	Decapod		5.792	27.766	13.5855
OP6CE4	BCCE	200 - 300	n	13.9728	9	LCRUST	Decapod		8.678	29.981	18.1679
OP6CE4	BCCE	200 - 300	n	13.9728	9	LCRUST	Decapod		5.798	24.042	7.87453
OP6CE4	BCCE	200 - 300	n	13.9728	9	LCRUST	Decapod		10.445	32.603	24.9572
OP6CE4	BCCE	200 - 300	n	13.9728	9	LCRUST	Decapod		8.011	29.727	17.5919
OP6CE4	BCCE	200 - 300	n	13.9728	9	LCRUST	Decapod		7.09	29.247	16.5401
OP6CE4	BCCE	200 - 300	n	13.9728	9	LCRUST	Decapod		6.521	27.1	12.3921
OP6CE4	BCCE	200 - 300	n	13.9728	9	LCRUST	Decapod		10.987	43.071	71.6387
OP6CE4	BCCE	200 - 300	n	13.9728	9	LCRUST	Decapod		8.754	33.417	27.4002
OP6CE4	BCCE	200 - 300	n	13.9728	9	LCRUST	Decapod		6.094	23.682	7.43724
OP6CE4	BCCE	200 - 300	n	13.9728	9	LCRUST	Decapod		9.204	31.115	20.9106
OP6CE4	BCCE	200 - 300	n	13.9728	9	LCRUST	Decapod		6.298	22.473	6.09859
OP6CE4	BCCE	200 - 300	n	13.9728	9	LCRUST	Decapod		4.068	20.037	3.94939
OP6CE4	BCCE	200 - 300	n	13.9728	9	LCRUST	Decapod		5.405	20.703	4.47
OP6CE4	BCCE	200 - 300	n	13.9728	9	LCRUST	Decapod		4.851	23.65	7.39925
OP6CE4	BCCE	200 - 300	n	13.9728	9	LCRUST	Decapod		11.242	40.044	54.3624
OP6CE4	BCCE	200 - 300	n	13.9728	9	LCRUST	Decapod		9.677	39.984	54.0546
OP6CE4	BCCE	200 - 300	n	13.9728	9	LCRUST	Decapod		10.172	31.572	22.0977
OP6CE4	BCCE	200 - 300	n	13.9728	9	LCRUST	Decapod		8.076	33.319	27.0972
OP6CE4	BCCE	200 - 300	n	13.9728	9	LCRUST	Decapod		6.172	23.175	6.85203
OP6CE4	BCCE	200 - 300	n	13.9728	9	LCRUST	Decapod		9.803	36.56	38.5118
OP6CE4	BCCE	200 - 300	n	13.9728	9	LCRUST	Decapod		6.164	22.183	5.80588
OP6CE4	BCCE	200 - 300	n	13.9728	9	LCRUST	Decapod		7.366	28.394	14.7863
OP6CE4	BCCE	200 - 300	n	13.9728	9	LCRUST	Decapod		8.317	29.486	17.0579
OP6CE4	BCCE	200 - 300	n	13.9728	9	LCRUST	Decapod		9.747	31.221	21.1816
OP6CE4	BCCE	200 - 300	n	13.9728	9	LCRUST	Decapod		19.408	61.767	280.598
OP6CE4	BCCE	200 - 300	n	13.9728	9	LCRUST	Decapod		13.927	46.656	96.971
OP6CE4	BCCE	200 - 300	n	13.9728	9	LCRUST	Decapod		11.976	43.768	76.1289
OP6CE4	BCCE	200 - 300	n	13.9728	9	LCRUST	Decapod		28.734	75.238	592.321
OP6CE4	BCCE	200 - 300	n	13.9728	9	LCRUST	Decapod		7.997	23.836	7.62205
OP6CE4	BCCE	200 - 300	n	13.9728	9	LCRUST	Decapod		6.294	21.21	4.8989
OP6CE4	BCCE	200 - 300	n	13.9728	9	LCRUST	Decapod		6.308	22.862	6.50811
OP6CE4	BCCE	200 - 300	n	13.9728	9	LCRUST	Decapod		13.047	44.648	82.0899
OP6CE4	BCCE	200 - 300	n	13.9728	9	LCRUST	Decapod		8.262	28.548	15.0923
OP6CE4	BCCE	200 - 300	n	13.9728	9	LCRUST	Decapod		5.687	26.912	12.0696
OP6CE4	BCCE	200 - 300	n	13.9728	9	LCRUST	Decapod		5.313	20.52	4.3222
OP6CE4	BCCE	200 - 300	n	13.9728	9	LCRUST	Decapod		6.088	23.514	7.2394
OP6CE4	BCCE	200 - 300	n	13.9728	9	LCRUST	Decapod		11.901	42.672	69.1577
OP6CE4	BCCE	200 - 300	n	13.9728	9	LCRUST	Decapod		12.597	36.87	39.7631
OP6CE4	BCCE	200 - 300	n	13.9728	9	LCRUST	Decapod		9.422	31.379	21.5904
OP6CE4	BCCE	200 - 300	n	13.9728	9	LCRUST	Decapod		9.802	43.145	72.1059
OP6CE4	BCCE	200 - 300	n	13.9728	9	LCRUST	Decapod		9.209	28.19	14.388
OP6CE4	BCCE	200 - 300	n	13.9728	9	LCRUST	Decapod		12.329	38.713	47.8303
OP6CE4	BCCE	200 - 300	n	13.9728	9	LCRUST	Decapod		7.048	25.569	9.94263
OP6CE4	BCCE	200 - 300	n	13.9728	9	LCRUST	Decapod		6.631	22.89	6.53835
OP6CE4	BCCE	200 - 300	n	13.9728	9	LCRUST	Decapod		8.835	26.914	12.073
OP6CE4	BCCE	200 - 300	n	13.9728	9	LCRUST	Decapod		7.979	30.657	19.7687
OP6CE4	BCCE	200 - 300	n	13.9728	9	LCRUST	Decapod		6.639	26.115	10.7709
OP6CE4	BCCE	200 - 300	n	13.9728	9	LCRUST	Decapod		9.073	33.523	27.7308
OP6CE4	BCCE	200 - 300	n	13.9728	9	LCRUST	Decapod		7.745	27.741	13.5392
OP6CE4	BCCE	200 - 300	n	13.9728	9	LCRUST	Decapod		9.414	35.727	35.2929
OP6CE4	BCCE	200 - 300	n	13.9728	9	LCRUST	Decapod		10.695	34.293	30.2212
OP6CE4	BCCE	200 - 300	n	13.9728	9	LCRUST	Decapod		6.685	25.643	10.052
OP6CE4	BCCE	200 - 300	n	13.9728	9	LCRUST	Decapod		7.773	24.623	8.61981
OP6CE4	BCCE	200 - 300	n	13.9728	9	LCRUST	Decapod		15.181	58.976	235.525
OP6CE4	BCCE	200 - 300	n	13.9728	9	LCRUST	Decapod		6.385	21.872	5.5036
OP6CE4	BCCE	200 - 300	n	13.9728	9	LCRUST	Decapod		14.281	54.889	179.44
OP6CE4	BCCE	200 - 300	n	13.9728	9	LCRUST	Decapod		4.513	20.079	3.98083
OP6CE4	BCCE	200 - 300	n	13.9728	9	LCRUST	Decapod		5.711	21.634	5.28022
OP6CE4	BCCE	200 - 300	n	13.9728	9	LCRUST	Decapod		7.979	23.033	6.69438
OP6CE4	BCCE	200 - 300	n	13.9728	9	LCRUST	Decapod		4.008	20.098	3.99511
OP6CE4	BCCE	200 - 300	n	13.9728	9	TOOTH	Anoplogastridae	Anoplogaster cornuta	22.909	26.196	0.286022
OP6CE4	BCCE	200 - 300	n	13.9728	9	TOOTH	Anoplogastridae	Anoplogaster cornuta	29.911	33.89	0.539588
OP6CE4	BCCE	200 - 300	n	13.9728	9	TOOTH	Anoplogastridae	Anoplogaster cornuta	23.046	26.22	0.29011
OP6CE4	BCCE	200 - 300	n	13.9728	9	TOOTH	Stomiidae	Astronesthes indopacificus	49.457	54.644	21.8379
OP6CE4	BCCE	200 - 300	n	13.9728	9	TOOTH	Stomiidae	Astronesthes sp	35.389	39.097	9.3952
OP6CE4	BCCE	200 - 300	n	13.9728	9	FISH	Macroramphosidae	Macroramphosus scolopax	20.872	23.239	0.0422441
OP6CE4	BCCE	200 - 300	n	13.9728	9	TOOTH	Stomiidae	Malacosteus niger	79.19	83.31	71.5166
OP6CE4	BCCE	200 - 300	n	13.9728	9	NANNO	Myctophidae	Nannobrachium atrum	81.077	94.415	508.638
OP6CE4	BCCE	200 - 300	n	13.9728	9	NANNO	Myctophidae	Nannobrachium atrum	66.851	75.334	290.57
OP6CE4	BCCE	200 - 300	n	13.9728	9	SLEND	Gempylidae	Neolatus tripes	78.77	89.322	62.1764
OP6CE4	BCCE	200 - 300	n	13.9728	9	SCOPE	Myctophidae	Scopelopsis multipunctatus	62.301	74.796	236.817
OP6CE4	BCCE	200 - 300	n	13.9728	9	SCOPE	Myctophidae	Scopelopsis multipunctatus	58.941	68.857	201.623
OP6CE4	BCCE	200 - 300	n	13.9728	9	SCOPE	Myctophidae	Scopelopsis multipunctatus	38.93	46.412	60.5053
OP6CE4	BCCE	200 - 300	n	13.9728	9	SCOPE	Myctophidae	Scopelopsis multipunctatus	60.592	71.079	218.452
OP6CE4	BCCE	200 - 300	n	13.9728	9	SCOPE	Myctophidae	Scopelopsis multipunctatus	40.681	46.845	68.7452
OP6CE4	BCCE	200 - 300	n	13.9728	9	SCOPE	Myctophidae	Scopelopsis multipunctatus	38.619	44.251	59.1132
OP6CE4	BCCE	200 - 300	n	13.9728	9	SCOPE	Myctophidae	Scopelopsis multipunctatus	59.712	71.191	209.372
OP6CE4	BCCE	200 - 300	n	13.9728	9	SCOPE	Myctophidae	Scopelopsis multipunctatus	38.939	45.623	60.5459
OP6CE4	BCCE	200 - 300	n	13.9728	9	SCOPE	Myctophidae	Scopelopsis multipunctatus	61.819	74.08	231.539
OP6CE4	BCCE	200 - 300	n	13.9728	9	SCOPE	Myctophidae	Scopelopsis multipunctatus	61.838	73.05	231.745
OP6CE4	BCCE	200 - 300	n	13.9728	9	SCOPE	Myctophidae	Scopelopsis multipunctatus	64.104	74.003	257.258
OP6CE4	BCCE	200 - 300	n	13.9728	9	SCOPE	Myctophidae	Scopelopsis multipunctatus	24.198	26.561	15.2235
OP6CE4	BCCE	200 - 300	n	13.9728	9	SCOPE	Myctophidae	Scopelopsis multipunctatus	58.624	68.082	198.492
OP6CE4	BCCE	200 - 300	n	13.9728	9	SCOPE	Myctophidae	Scopelopsis multipunctatus	61.423	71.902	227.261
OP6CE4	BCCE	200 - 300	n	13.9728	9	SCOPE	Myctophidae	Scopelopsis multipunctatus	20.546	23.569	9.4694
OP6CE4	BCCE	200 - 300	n	13.9728	9	SCOPE	Myctophidae	Scopelopsis multipunctatus	64.177	73.807	258.109
OP6CE4	BCCE	200 - 300	n	13.9728	9	SCOPE	Myctophidae	Scopelopsis multipunctatus	64.811	73.863	265.578
OP6CE4	BCCE	200 - 300	n	13.9728	9	SCOPE	Myctophidae	Scopelopsis multipunctatus	64.693	75.939	264.177
OP6CE4	BCCE	200 - 300	n	13.9728	9	SCOPE	Myctophidae	Scopelopsis multipunctatus	45.962	50.795	97.9647
OP6CE4	BCCE	200 - 300	n	13.9728	9	SCOPE	Myctophidae	Scopelopsis multipunctatus	41.118	46.593	70.9102
OP6CE4	BCCE	200 - 300	n	13.9728	9	SCOPE	Myctophidae	Scopelopsis multipunctatus	63.218	72.257	247.074
OP6CE4	BCCE	200 - 300	n	13.9728	9	SCOPE	Myctophidae	Scopelopsis multipunctatus	24.519	27.963	15.817
OP6CE4	BCCE	200 - 300	n	13.9728	9	SCOPE	Myctophidae	Scopelopsis multipunctatus	28.678	31.044	24.9227
OP6CE4	BCCE	200 - 300	n	13.9728	9	SCOPE	Myctophidae	Scopelopsis multipunctatus	58.574	69.771	198.001
OP6CE4	BCCE	200 - 300	n	13.9728	9	SCOPE	Myctophidae	Scopelopsis multipunctatus	44.889	51.434	91.474
OP6CE4	BCCE	200 - 300	n	13.9728	9	SCOPE	Myctophidae	Scopelopsis multipunctatus	62.483	73.97	238.83
OP6CE4	BCCE	200 - 300	n	13.9728	9	SCOPE	Myctophidae	Scopelopsis multipunctatus	60.809	70.764	220.731
OP6CE4	BCCE	200 - 300	n	13.9728	9	SCOPE	Myctophidae	Scopelopsis multipunctatus	62.168	73.081	235.353
OP6CE4	BCCE	200 - 300	n	13.9728	9	SCOPE	Myctophidae	Scopelopsis multipunctatus	58.342	67.405	195.734
OP6CE4	BCCE	200 - 300	n	13.9728	9	SCOPE	Myctophidae	Scopelopsis multipunctatus	20.14	22.219	8.93652
OP6CE4	BCCE	200 - 300	n	13.9728	9	SCOPE	Myctophidae	Scopelopsis multipunctatus	22.517	24.092	12.353
OP6CE4	BCCE	200 - 300	n	13.9728	9	SCOPE	Myctophidae	Scopelopsis multipunctatus	22.415	24.493	12.1913
OP6CE4	BCCE	200 - 300	n	13.9728	9	SCOPE	Myctophidae	Scopelopsis multipunctatus	23.091	26.21	13.2892
OP6CE4	BCCE	200 - 300	n	13.9728	9	SCOPE	Myctophidae	Scopelopsis multipunctatus	19.28	20.923	7.87351
OP6CE4	BCCE	200 - 300	n	13.9728	9	LARV	Ceratiidae	Ceratioid	25.346	28.835	4.05144
OP6CE4	BCCE	200 - 300	n	13.9728	9	MYCTO	Myctophidae	Unidentified Species	12.584		2.28277
OP6CE4	BCCE	200 - 300	n	13.9728	9	MYCTO	Myctophidae	Unidentified Species	17.396		5.84214
OP6CE4	BCCE	200 - 300	n	13.9728	9	MYCTO	Myctophidae	Unidentified Species	15.975		4.56219
OP6CE4	BCCE	200 - 300	n	13.9728	9	MYCTO	Myctophidae	Unidentified Species	23.346	25.523	13.7196
OP6CE4	BCCE	200 - 300	n	13.9728	9	MYCTO	Myctophidae	Unidentified Species	23.04	26.17	13.2042
OP6CE4	BCCE	200 - 300	n	13.9728	9	MYCTO	Myctophidae	Unidentified Species	21.1	23.85	10.2295
OP6CE4	BCCE	200 - 300	n	13.9728	9	MYCTO	Myctophidae	Unidentified Species	21.89	23.8	11.381
OP6CE4	BCCE	200 - 300	n	13.9728	9	MYCTO	Myctophidae	Unidentified Species	23.045		13.2125
OP6CE4	BCCE	200 - 300	n	13.9728	9	MYCTO	Myctophidae	Unidentified Species	26.17		19.1097
OP6CE4	BCCE	200 - 300	n	13.9728	9	MYCTO	Myctophidae	Unidentified Species	21.11		10.2436
OP6CE4	BCCE	200 - 300	n	13.9728	9	MYCTO	Myctophidae	Unidentified Species	21.106		10.238
OP6CE4	BCCE	200 - 300	n	13.9728	9	MYCTO	Myctophidae	Unidentified Species	23.859		14.6128
OP6CE4	BCCE	200 - 300	n	13.9728	9	MYCTO	Myctophidae	Unidentified Species	21.892		11.384
OP6CE4	BCCE	200 - 300	n	13.9728	9	MYCTO	Myctophidae	Unidentified Species	23.808		14.5224
OP6CE4	BCCE	200 - 300	n	13.9728	9	MYCTO	Myctophidae	Unidentified Species	16.291		4.82903
OP6CE4	BCCE	200 - 300	n	13.9728	9	MYCTO	Myctophidae	Unidentified Species	17.828		6.27318
OP6CE4	BCCE	200 - 300	n	13.9728	9	MYCTO	Myctophidae	Unidentified Species	20.287		9.12712
OP6CE4	BCCE	200 - 300	n	13.9728	9	MYCTO	Myctophidae	Unidentified Species	24.443		15.6752
OP6CE4	BCCE	200 - 300	n	13.9728	9	MYCTO	Myctophidae	Unidentified Species	20.659		9.62133
OP6CE4	BCCE	200 - 300	n	13.9728	9	MYCTO	Myctophidae	Unidentified Species	21.304		10.5192
OP6CE4	BCCE	200 - 300	n	13.9728	9	MYCTO	Myctophidae	Unidentified Species	18.726		7.23475
OP6CE4	BCCE	200 - 300	n	13.9728	9	MYCTO	Myctophidae	Unidentified Species	25.165		17.0569
OP6CE4	BCCE	200 - 300	n	13.9728	9	MYCTO	Myctophidae	Unidentified Species	19.835		8.54941
OP6CE4	BCCE	200 - 300	n	13.9728	9	MYCTO	Myctophidae	Unidentified Species	21.125		10.2647
OP6CE4	BCCE	200 - 300	n	13.9728	9	MYCTO	Myctophidae	Unidentified Species	22.477		12.2895
OP6CE4	BCCE	200 - 300	n	13.9728	9	MYCTO	Myctophidae	Unidentified Species	22.092		11.6885
OP6CE4	BCCE	200 - 300	n	13.9728	9	MYCTO	Myctophidae	Unidentified Species	20.895		9.94376
OP6CE4	BCCE	200 - 300	n	13.9728	9	MYCTO	Myctophidae	Unidentified Species	24.575		15.9221
OP6CE4	BCCE	200 - 300	n	13.9728	9	MYCTO	Myctophidae	Unidentified Species	23.361		13.7452
OP6CE4	BCCE	200 - 300	n	13.9728	9	MYCTO	Myctophidae	Unidentified Species	23.696		14.325
OP6CE4	BCCE	200 - 300	n	13.9728	9	MYCTO	Myctophidae	Unidentified Species	25.333		17.3895
OP6CE4	BCCE	200 - 300	n	13.9728	9	MYCTO	Myctophidae	Unidentified Species	26.271		19.3245
OP6CE4	BCCE	200 - 300	n	13.9728	9	MYCTO	Myctophidae	Unidentified Species	17.586		6.02924
OP6CE4	BCCE	200 - 300	n	13.9728	9	MYCTO	Myctophidae	Unidentified Species	28.186		23.702
OP6CE4	BCCE	200 - 300	n	13.9728	9	MYCTO	Myctophidae	Unidentified Species	23.93		14.7394
OP6CE4	BCCE	200 - 300	n	13.9728	9	MYCTO	Myctophidae	Unidentified Species	27.864		22.9247
OP6CE4	BCCE	200 - 300	n	13.9728	9	MYCTO	Myctophidae	Unidentified Species	14.685		3.57319
OP6CE4	BCCE	200 - 300	n	13.9728	9	MYCTO	Myctophidae	Unidentified Species	39.046		61.0299
OP6CE4	BCCE	200 - 300	n	13.9728	9	MYCTO	Myctophidae	Unidentified Species	24.847		16.4389
OP6CE4	BCCE	200 - 300	n	13.9728	9	MYCTO	Myctophidae	Unidentified Species	23.03		13.1876
OP6CE4	BCCE	200 - 300	n	13.9728	9	MYCTO	Myctophidae	Unidentified Species	21.513		10.8215
OP6CE4	BCCE	200 - 300	n	13.9728	9	MYCTO	Myctophidae	Unidentified Species	26.863		20.6155
OP6CE4	BCCE	200 - 300	n	13.9728	9	MYCTO	Myctophidae	Unidentified Species	21.755		11.1785
OP6CE4	BCCE	200 - 300	n	13.9728	9	MYCTO	Myctophidae	Unidentified Species	24.695		16.1488
OP6CE4	BCCE	200 - 300	n	13.9728	9	MYCTO	Myctophidae	Unidentified Species	19.904		8.636
OP6CE4	BCCE	200 - 300	n	13.9728	9	MYCTO	Myctophidae	Unidentified Species	21.153		10.3043
OP6CE4	BCCE	200 - 300	n	13.9728	9	MYCTO	Myctophidae	Unidentified Species	23.163		13.4098
OP6CE4	BCCE	200 - 300	n	13.9728	9	MYCTO	Myctophidae	Unidentified Species	25.909		18.5619
OP6CE4	BCCE	200 - 300	n	13.9728	9	FISH	Phosichthyidae	Ichthyococcus ovatus	37.45	44.349	72.4995
OP6CE4	BCCE	200 - 300	n	13.9728	9	FISH	Phosichthyidae	Ichthyococcus ovatus	42.772	48.91	123.949
OP6CE4	BCCE	200 - 300	n	13.9728	9	FISH	Bregmacerotidae	Bregmaceros sp	21.11		29.7682
OP6CE4	BCCE	200 - 300	n	13.9728	9	FISH	Phosichthyidae	Ichthyococcus ovatus	19.324		5.01847
OP6CE4	BCCE	200 - 300	n	13.9728	9	FISH	Phosichthyidae	Vinciguerria poweriae	48.91		212.957
OP6CE4	BCCE	200 - 300	n	13.9728	9	FISH	Phosichthyidae	Vinciguerria poweriae	38.241		78.8808
OP6CE4	BCCE	200 - 300	n	13.9728	9	FISH	Phosichthyidae	Vinciguerria poweriae	36.357		64.3305
OP6CE4	BCCE	200 - 300	n	13.9728	9	FISH	Phosichthyidae	Vinciguerria poweriae	35.469		58.2202
OP6CE4	BCCE	200 - 300	n	13.9728	9	FISH	Phosichthyidae	Vinciguerria poweriae	35.825		60.6148
OP6CE4	BCCE	200 - 300	n	13.9728	9	FISH	Phosichthyidae	Vinciguerria poweriae	37.163		70.283
OP6CE4	BCCE	200 - 300	n	13.9728	9	FISH	Phosichthyidae	Vinciguerria poweriae	22.089		8.6095
OP6CE4	BCCE	200 - 300	n	13.9728	9	FISH	Phosichthyidae	Vinciguerria poweriae	31.741		37.1898
OP6CE4	BCCE	200 - 300	n	13.9728	9	FISH	Phosichthyidae	Vinciguerria poweriae	33.448		45.9453
OP6CE4	BCCE	200 - 300	n	13.9728	9	FISH	Phosichthyidae	Vinciguerria poweriae	32.645		41.6531
OP6CE4	BCCE	200 - 300	n	13.9728	9	FISH	Phosichthyidae	Vinciguerria poweriae	35.608		59.1466
OP6CE4	BCCE	200 - 300	n	13.9728	9	FISH	Phosichthyidae	Vinciguerria poweriae	16.9		2.92169
OP6CE4	BCCE	200 - 300	n	13.9728	9	FISH	Phosichthyidae	Vinciguerria poweriae	19.061		4.74844
OP6CE4	BCCE	200 - 300	n	13.9728	9	FISH	Phosichthyidae	Vinciguerria poweriae	31.182		34.6162
OP6CE4	BCCE	200 - 300	n	13.9728	9	FISH	Phosichthyidae	Vinciguerria poweriae	24.604		13.304
OP6CE5	BCCE	100 - 200	n	16.5273	9	HATCH	Sternoptychidae	Argyropelecus aculeatus	41.82	49.99	109.96
OP6CE5	BCCE	100 - 200	n	16.5273	9	HATCH	Sternoptychidae	Argyropelecus aculeatus	28.186	32.2	34.336
OP6CE5	BCCE	100 - 200	n	16.5273	9	HATCH	Sternoptychidae	Argyropelecus aculeatus	42.105	51.614	112.185
OP6CE5	BCCE	100 - 200	n	16.5273	9	HATCH	Sternoptychidae	Argyropelecus aculeatus	35.974	44.412	70.5209
OP6CE5	BCCE	100 - 200	n	16.5273	9	HATCH	Sternoptychidae	Argyropelecus aculeatus	22.23	25.738	17.046
OP6CE5	BCCE	100 - 200	n	16.5273	9	HATCH	Sternoptychidae	Argyropelecus aculeatus	26.864	29.904	29.7992
OP6CE5	BCCE	100 - 200	n	16.5273	9	HATCH	Sternoptychidae	Argyropelecus aculeatus	24.295	28.842	22.1527
OP6CE5	BCCE	100 - 200	n	16.5273	9	HATCH	Sternoptychidae	Argyropelecus aculeatus	34.125	38.746	60.3553
OP6CE5	BCCE	100 - 200	n	16.5273	9	HATCH	Sternoptychidae	Argyropelecus aculeatus	34.387	44.241	61.7326
OP6CE5	BCCE	100 - 200	n	16.5273	9	HATCH	Sternoptychidae	Argyropelecus aculeatus	22.65	29.41	18.0137
OP6CE5	BCCE	100 - 200	n	16.5273	9	HATCH	Sternoptychidae	Argyropelecus aculeatus	23.688	27.551	20.5594
OP6CE5	BCCE	100 - 200	n	16.5273	9	SCOPE	Myctophidae	Scopelopsis multipunctatus	41.862	48.573	74.6981
OP6CE5	BCCE	100 - 200	n	16.5273	9	SCOPE	Myctophidae	Scopelopsis multipunctatus	63.388	72.567	249.007
OP6CE5	BCCE	100 - 200	n	16.5273	9	SCOPE	Myctophidae	Scopelopsis multipunctatus	58.065	69.773	193.049
OP6CE5	BCCE	100 - 200	n	16.5273	9	SCOPE	Myctophidae	Scopelopsis multipunctatus	60.176	73.68	214.128
OP6CE5	BCCE	100 - 200	n	16.5273	9	SCOPE	Myctophidae	Scopelopsis multipunctatus	61.161	72.602	224.459
OP6CE5	BCCE	100 - 200	n	16.5273	9	SCOPE	Myctophidae	Scopelopsis multipunctatus	59.346	68.458	205.669
OP6CE5	BCCE	100 - 200	n	16.5273	9	SCOPE	Myctophidae	Scopelopsis multipunctatus	61.445	69.39	227.497
OP6CE5	BCCE	100 - 200	n	16.5273	9	SCOPE	Myctophidae	Scopelopsis multipunctatus	64.574	74.4	262.77
OP6CE5	BCCE	100 - 200	n	16.5273	9	SCOPE	Myctophidae	Scopelopsis multipunctatus	62.614	74.619	240.286
OP6CE5	BCCE	100 - 200	n	16.5273	9	SCOPE	Myctophidae	Scopelopsis multipunctatus	62.685	74.85	241.078
OP6CE5	BCCE	100 - 200	n	16.5273	9	SCOPE	Myctophidae	Scopelopsis multipunctatus	54.536	63.561	160.932
OP6CE5	BCCE	100 - 200	n	16.5273	9	SCOPE	Myctophidae	Scopelopsis multipunctatus	63.477	69.44	250.023
OP6CE5	BCCE	100 - 200	n	16.5273	9	SCOPE	Myctophidae	Scopelopsis multipunctatus	62.349	74.078	237.347
OP6CE5	BCCE	100 - 200	n	16.5273	9	SCOPE	Myctophidae	Scopelopsis multipunctatus	64.923	74.824	266.912
OP6CE5	BCCE	100 - 200	n	16.5273	9	SCOPE	Myctophidae	Scopelopsis multipunctatus	62.529	73.48	239.341
OP6CE5	BCCE	100 - 200	n	16.5273	9	SCOPE	Myctophidae	Scopelopsis multipunctatus	62.503	73.594	239.052
OP6CE5	BCCE	100 - 200	n	16.5273	9	SCOPE	Myctophidae	Scopelopsis multipunctatus	61.266	74.576	225.579
OP6CE5	BCCE	100 - 200	n	16.5273	9	SCOPE	Myctophidae	Scopelopsis multipunctatus	60.301	72.156	215.422
OP6CE5	BCCE	100 - 200	n	16.5273	9	SCOPE	Myctophidae	Scopelopsis multipunctatus	63.26	73.51	247.551
OP6CE5	BCCE	100 - 200	n	16.5273	9	SCOPE	Myctophidae	Scopelopsis multipunctatus	62.66	74.433	240.799
OP6CE5	BCCE	100 - 200	n	16.5273	9	SCOPE	Myctophidae	Scopelopsis multipunctatus	61.886	74.455	232.268
OP6CE5	BCCE	100 - 200	n	16.5273	9	SCOPE	Myctophidae	Scopelopsis multipunctatus	64.923	76.403	266.912
OP6CE5	BCCE	100 - 200	n	16.5273	9	SCOPE	Myctophidae	Scopelopsis multipunctatus	63.191	75.915	246.768
OP6CE5	BCCE	100 - 200	n	16.5273	9	SCOPE	Myctophidae	Scopelopsis multipunctatus	61.516	72.565	228.261
OP6CE5	BCCE	100 - 200	n	16.5273	9	SCOPE	Myctophidae	Scopelopsis multipunctatus	61.704	72.983	230.291
OP6CE5	BCCE	100 - 200	n	16.5273	9	SCOPE	Myctophidae	Scopelopsis multipunctatus	60.502	69.97	217.512
OP6CE5	BCCE	100 - 200	n	16.5273	9	SCOPE	Myctophidae	Scopelopsis multipunctatus	63.105	72.977	245.795
OP6CE5	BCCE	100 - 200	n	16.5273	9	SCOPE	Myctophidae	Scopelopsis multipunctatus	63.018	72.878	244.813
OP6CE5	BCCE	100 - 200	n	16.5273	9	SCOPE	Myctophidae	Scopelopsis multipunctatus	64.196	75.329	258.331
OP6CE5	BCCE	100 - 200	n	16.5273	9	SCOPE	Myctophidae	Scopelopsis multipunctatus	60.725	71.633	219.847
OP6CE5	BCCE	100 - 200	n	16.5273	9	SCOPE	Myctophidae	Scopelopsis multipunctatus	62.257	71.646	236.332
OP6CE5	BCCE	100 - 200	n	16.5273	9	SCOPE	Myctophidae	Scopelopsis multipunctatus	64.182	75.76	258.167
OP6CE5	BCCE	100 - 200	n	16.5273	9	SCOPE	Myctophidae	Scopelopsis multipunctatus	66.844	78.679	290.482
OP6CE5	BCCE	100 - 200	n	16.5273	9	SCOPE	Myctophidae	Scopelopsis multipunctatus	61.338	74.572	226.349
OP6CE5	BCCE	100 - 200	n	16.5273	9	SCOPE	Myctophidae	Scopelopsis multipunctatus	58.204	70.269	194.393
OP6CE5	BCCE	100 - 200	n	16.5273	9	SCOPE	Myctophidae	Scopelopsis multipunctatus	64.452	78.248	261.332
OP6CE5	BCCE	100 - 200	n	16.5273	9	SCOPE	Myctophidae	Scopelopsis multipunctatus	63.882	77.022	254.681
OP6CE5	BCCE	100 - 200	n	16.5273	9	SCOPE	Myctophidae	Scopelopsis multipunctatus	70.734	75.53	342.302
OP6CE5	BCCE	100 - 200	n	16.5273	9	SCOPE	Myctophidae	Scopelopsis multipunctatus	60.017	71.562	212.491
OP6CE5	BCCE	100 - 200	n	16.5273	9	SCOPE	Myctophidae	Scopelopsis multipunctatus	61.436	73.008	227.4
OP6CE5	BCCE	100 - 200	n	16.5273	9	SCOPE	Myctophidae	Scopelopsis multipunctatus	64.13	75.861	257.561
OP6CE5	BCCE	100 - 200	n	16.5273	9	SCOPE	Myctophidae	Scopelopsis multipunctatus	59.978	71.22	212.09
OP6CE5	BCCE	100 - 200	n	16.5273	9	SCOPE	Myctophidae	Scopelopsis multipunctatus	43.873	52.714	85.5942
OP6CE5	BCCE	100 - 200	n	16.5273	9	SCOPE	Myctophidae	Scopelopsis multipunctatus	60.726	73.944	219.857
OP6CE5	BCCE	100 - 200	n	16.5273	9	SCOPE	Myctophidae	Scopelopsis multipunctatus	50.871	60.635	131.512
OP6CE5	BCCE	100 - 200	n	16.5273	9	SCOPE	Myctophidae	Scopelopsis multipunctatus	60.628	72.383	218.829
OP6CE5	BCCE	100 - 200	n	16.5273	9	SCOPE	Myctophidae	Scopelopsis multipunctatus	60.353	70.944	215.961
OP6CE5	BCCE	100 - 200	n	16.5273	9	SCOPE	Myctophidae	Scopelopsis multipunctatus	59.409	72.603	206.304
OP6CE5	BCCE	100 - 200	n	16.5273	9	SCOPE	Myctophidae	Scopelopsis multipunctatus	62.673	74.374	240.944
OP6CE5	BCCE	100 - 200	n	16.5273	9	MYCTO	Myctophidae	Diaphus sp	42.771	48.585	79.503
OP6CE5	BCCE	100 - 200	n	16.5273	9	MYCTO	Myctophidae	Diaphus sp	44.816	52.453	91.043
OP6CE5	BCCE	100 - 200	n	16.5273	9	MYCTO	Myctophidae	Diaphus sp	40.242	47.129	66.6144
OP6CE5	BCCE	100 - 200	n	16.5273	9	MYCTO	Myctophidae	Diaphus sp	40.745	46.253	69.0595
OP6CE5	BCCE	100 - 200	n	16.5273	9	MYCTO	Myctophidae	Diaphus sp	44.354	50.984	88.346
OP6CE5	BCCE	100 - 200	n	16.5273	9	MYCTO	Myctophidae	Diaphus sp	39.834	46.086	64.6733
OP6CE5	BCCE	100 - 200	n	16.5273	9	MYCTO	Myctophidae	Diaphus sp	43.958	51.069	86.0764
OP6CE5	BCCE	100 - 200	n	16.5273	9	MYCTO	Myctophidae	Diaphus sp	35.254	41.187	45.3719
OP6CE5	BCCE	100 - 200	n	16.5273	9	MYCTO	Myctophidae	Diaphus sp	38.516	44.657	58.6568
OP6CE5	BCCE	100 - 200	n	16.5273	9	MYCTO	Myctophidae	Diaphus sp	42.176	48.383	76.3357
OP6CE5	BCCE	100 - 200	n	16.5273	9	MYCTO	Myctophidae	Diaphus sp	19.032		7.58318
OP6CE5	BCCE	100 - 200	n	16.5273	9	MYCTO	Myctophidae	Diaphus sp	25.993		18.737
OP6CE5	BCCE	100 - 200	n	16.5273	9	MYCTO	Myctophidae	Diaphus sp	30.325	34.532	29.3072
OP6CE5	BCCE	100 - 200	n	16.5273	9	MYCTO	Myctophidae	Diaphus sp	77.401	92.099	444.56
OP6CE5	BCCE	100 - 200	n	16.5273	9	MYCTO	Myctophidae	Diaphus sp	56.329	64.883	176.771
OP6CE5	BCCE	100 - 200	n	16.5273	9	MYCTO	Myctophidae	Diaphus sp	63.66	71.855	252.121
OP6CE5	BCCE	100 - 200	n	16.5273	9	MYCTO	Myctophidae	Diaphus sp	54.496	61.446	160.59
OP6CE5	BCCE	100 - 200	n	16.5273	9	MYCTO	Myctophidae	Diaphus sp	33.064	37.684	37.6667
OP6CE5	BCCE	100 - 200	n	16.5273	9	MYCTO	Myctophidae	Diaphus sp	62.78	70.743	242.139
OP6CE5	BCCE	100 - 200	n	16.5273	9	MYCTO	Myctophidae	Diaphus sp	44.748	48.779	90.6427
OP6CE5	BCCE	100 - 200	n	16.5273	9	MYCTO	Myctophidae	Diaphus sp	49.332	55.355	120.295
OP6CE5	BCCE	100 - 200	n	16.5273	9	MYCTO	Myctophidae	Diaphus sp	48.929	57.184	117.465
OP6CE5	BCCE	100 - 200	n	16.5273	9	MYCTO	Myctophidae	Diaphus sp	75.945	86.068	420.723
OP6CE5	BCCE	100 - 200	n	16.5273	9	MYCTO	Myctophidae	Diaphus sp	65.759	70.353	277.009
OP6CE5	BCCE	100 - 200	n	16.5273	9	MYCTO	Myctophidae	Diaphus sp	46.218	55.567	99.5565
OP6CE5	BCCE	100 - 200	n	16.5273	9	MYCTO	Myctophidae	Diaphus sp	59.083	67.185	203.036
OP6CE5	BCCE	100 - 200	n	16.5273	9	MYCTO	Myctophidae	Diaphus sp	44.462	51.682	88.9717
OP6CE5	BCCE	100 - 200	n	16.5273	9	MYCTO	Myctophidae	Diaphus sp	47.174	55.337	105.651
OP6CE5	BCCE	100 - 200	n	16.5273	9	MYCTO	Myctophidae	Diaphus sp	46.147	52.181	99.1134
OP6CE5	BCCE	100 - 200	n	16.5273	9	MYCTO	Myctophidae	Diaphus sp	40.871	45.656	69.6811
OP6CE5	BCCE	100 - 200	n	16.5273	9	MYCTO	Myctophidae	Diaphus sp	63.08	71.397	245.512
OP6CE5	BCCE	100 - 200	n	16.5273	9	MYCTO	Myctophidae	Diaphus sp	59.987	69.07	212.183
OP6CE5	BCCE	100 - 200	n	16.5273	9	MYCTO	Myctophidae	Diaphus sp	41.499	48.178	72.8338
OP6CE5	BCCE	100 - 200	n	16.5273	9	MYCTO	Myctophidae	Diaphus sp	59.416	68.392	206.374
OP6CE5	BCCE	100 - 200	n	16.5273	9	MYCTO	Myctophidae	Diaphus sp	86.958	62.853	623.253
OP6CE5	BCCE	100 - 200	n	16.5273	9	MYCTO	Myctophidae	Diaphus sp	71.855	75.052	358.283
OP6CE5	BCCE	100 - 200	n	16.5273	9	MYCTO	Myctophidae	Diaphus sp	59.208	69.257	204.285
OP6CE5	BCCE	100 - 200	n	16.5273	9	MYCTO	Myctophidae	Diaphus sp	64.261	75.366	259.09
OP6CE5	BCCE	100 - 200	n	16.5273	9	MYCTO	Myctophidae	Diaphus sp	65.985	74.416	279.781
OP6CE5	BCCE	100 - 200	n	16.5273	9	MYCTO	Myctophidae	Diaphus sp	56.14	64.959	175.056
OP6CE5	BCCE	100 - 200	n	16.5273	9	MYCTO	Myctophidae	Diaphus sp	61.955	71.404	233.02
OP6CE5	BCCE	100 - 200	n	16.5273	9	MYCTO	Myctophidae	Diaphus sp	66.045	75.221	280.52
OP6CE5	BCCE	100 - 200	n	16.5273	9	MYCTO	Myctophidae	Diaphus sp	62.421	75.792	238.143
OP6CE5	BCCE	100 - 200	n	16.5273	9	MYCTO	Myctophidae	Diaphus sp	64.286	74.521	259.383
OP6CE5	BCCE	100 - 200	n	16.5273	9	MYCTO	Myctophidae	Diaphus sp	55.544	64.63	169.717
OP6CE5	BCCE	100 - 200	n	16.5273	9	MYCTO	Myctophidae	Diaphus sp	47.775	57.485	109.604
OP6CE5	BCCE	100 - 200	n	16.5273	9	MYCTO	Myctophidae	Diaphus sp	63.196	73.632	246.825
OP6CE5	BCCE	100 - 200	n	16.5273	9	MYCTO	Myctophidae	Diaphus sp	41.499	48.178	72.8338
OP6CE5	BCCE	100 - 200	n	16.5273	9	MYCTO	Myctophidae	Diaphus sp	59.416	68.392	206.374
OP6CE5	BCCE	100 - 200	n	16.5273	9	MYCTO	Myctophidae	Diaphus sp	86.958	62.853	623.253
OP6CE5	BCCE	100 - 200	n	16.5273	9	MYCTO	Myctophidae	Diaphus sp	71.855	75.052	358.283
OP6CE5	BCCE	100 - 200	n	16.5273	9	MYCTO	Myctophidae	Diaphus sp	59.208	69.257	204.285
OP6CE5	BCCE	100 - 200	n	16.5273	9	MYCTO	Myctophidae	Diaphus sp	64.261	75.366	259.09
OP6CE5	BCCE	100 - 200	n	16.5273	9	MYCTO	Myctophidae	Diaphus sp	65.985	74.416	279.781
OP6CE5	BCCE	100 - 200	n	16.5273	9	MYCTO	Myctophidae	Diaphus sp	56.14	64.959	175.056
OP6CE5	BCCE	100 - 200	n	16.5273	9	MYCTO	Myctophidae	Diaphus sp	61.955	71.404	233.02
OP6CE5	BCCE	100 - 200	n	16.5273	9	MYCTO	Myctophidae	Diaphus sp	66.045	75.221	280.52
OP6CE5	BCCE	100 - 200	n	16.5273	9	MYCTO	Myctophidae	Diaphus sp	62.421	75.792	238.143
OP6CE5	BCCE	100 - 200	n	16.5273	9	MYCTO	Myctophidae	Diaphus sp	64.286	74.521	259.383
OP6CE5	BCCE	100 - 200	n	16.5273	9	MYCTO	Myctophidae	Diaphus sp	55.544	64.63	169.717
OP6CE5	BCCE	100 - 200	n	16.5273	9	MYCTO	Myctophidae	Diaphus sp	47.775	57.485	109.604
OP6CE5	BCCE	100 - 200	n	16.5273	9	MYCTO	Myctophidae	Diaphus sp	63.196	73.632	246.825
OP6CE5	BCCE	100 - 200	n	16.5273	9	LCRUST	Decapod		4.999	20.365	4.19986
OP6CE5	BCCE	100 - 200	n	16.5273	9	LCRUST	Decapod		7.565	23.111	6.78064
OP6CE5	BCCE	100 - 200	n	16.5273	9	LCRUST	Decapod		5.488	20.111	4.00491
OP6CE5	BCCE	100 - 200	n	16.5273	9	LCRUST	Decapod		7.603	20.542	4.33978
OP6CE5	BCCE	100 - 200	n	16.5273	9	LCRUST	Decapod		5.579	24.596	8.58407
OP6CE5	BCCE	100 - 200	n	16.5273	9	LCRUST	Decapod		8.254	25.669	10.0907
OP6CE5	BCCE	100 - 200	n	16.5273	9	LCRUST	Decapod		6.543	20.12	4.0117
OP6CE5	BCCE	100 - 200	n	16.5273	9	LCRUST	Decapod		10.142	26.394	11.2132
OP6CE5	BCCE	100 - 200	n	16.5273	9	LCRUST	Decapod		13.277	32.801	25.536
OP6CE5	BCCE	100 - 200	n	16.5273	9	LCRUST	Decapod		9.935	31.303	21.3931
OP6CE5	BCCE	100 - 200	n	16.5273	9	LCRUST	Decapod		6.793	24.161	8.02316
OP6CE5	BCCE	100 - 200	n	16.5273	9	LCRUST	Decapod		10.034	27.249	12.6521
OP6CE5	BCCE	100 - 200	n	16.5273	9	LCRUST	Decapod		12.021	32.214	23.8481
OP6CE5	BCCE	100 - 200	n	16.5273	9	LCRUST	Decapod		8.948	29.465	17.0119
OP6CE5	BCCE	100 - 200	n	16.5273	9	LCRUST	Decapod		5.99	20.517	4.31981
OP6CE5	BCCE	100 - 200	n	16.5273	9	LCRUST	Decapod		10.859	30.032	18.2852
OP6CE5	BCCE	100 - 200	n	16.5273	9	LCRUST	Decapod		10.459	31.568	22.0871
OP6CE5	BCCE	100 - 200	n	16.5273	9	LCRUST	Decapod		10.515	28.148	14.307
OP6CE5	BCCE	100 - 200	n	16.5273	9	LCRUST	Decapod		7.95	20.731	4.49294
OP6CE5	BCCE	100 - 200	n	16.5273	9	LCRUST	Decapod		12.217	36.593	38.6436
OP6CE5	BCCE	100 - 200	n	16.5273	9	LCRUST	Decapod		12.547	40.169	55.0078
OP6CE5	BCCE	100 - 200	n	16.5273	9	LCRUST	Decapod		14.156	39.35	50.8798
OP6CE5	BCCE	100 - 200	n	16.5273	9	LCRUST	Decapod		8.319	27.472	13.0487
OP6CE5	BCCE	100 - 200	n	16.5273	9	LCRUST	Decapod		11.012	35.524	34.5395
OP6CE5	BCCE	100 - 200	n	16.5273	9	LCRUST	Decapod		8.064	21.368	5.03854
OP6CE5	BCCE	100 - 200	n	16.5273	9	LCRUST	Decapod		8.312	22.896	6.54484
OP6CE5	BCCE	100 - 200	n	16.5273	9	LCRUST	Decapod		5.896	21.349	5.0216
OP6CE5	BCCE	100 - 200	n	16.5273	9	LCRUST	Decapod		8.657	30.417	19.1889
OP6CE5	BCCE	100 - 200	n	16.5273	9	LCRUST	Decapod		7.565	31.935	23.0753
OP6CE5	BCCE	100 - 200	n	16.5273	9	LCRUST	Decapod		10.544	32.379	24.314
OP6CE5	BCCE	100 - 200	n	16.5273	9	LCRUST	Decapod		17.935	43.217	72.5627
OP6CE5	BCCE	100 - 200	n	16.5273	9	LCRUST	Decapod		13.214	39.614	52.1846
OP6CE5	BCCE	100 - 200	n	16.5273	9	LCRUST	Decapod		16.366	68.478	414.688
OP6CE5	BCCE	100 - 200	n	16.5273	9	LCRUST	Decapod		23.043	80.051	749.099
OP6CE5	BCCE	100 - 200	n	16.5273	9	LCRUST	Decapod		21.858	83.399	874.833
OP6CE5	BCCE	100 - 200	n	16.5273	9	LCRUST	Decapod		16.117	66.642	374.13
OP6CE5	BCCE	100 - 200	n	16.5273	9	LCRUST	Decapod		5.852	21.8	5.43531
OP6CE5	BCCE	100 - 200	n	16.5273	9	LCRUST	Decapod		8.181	28.524	15.0443
OP6CE5	BCCE	100 - 200	n	16.5273	9	LCRUST	Decapod		6.467	22.819	6.46187
OP6CE5	BCCE	100 - 200	n	16.5273	9	LCRUST	Decapod		10.064	21.794	5.42964
OP6CE5	BCCE	100 - 200	n	16.5273	9	LCRUST	Decapod		6.137	21.961	5.58889
OP6CE5	BCCE	100 - 200	n	16.5273	9	LCRUST	Decapod		5.566	21.146	4.84316
OP6CE5	BCCE	100 - 200	n	16.5273	9	LCRUST	Decapod		7.03	21.741	5.37981
OP6CE5	BCCE	100 - 200	n	16.5273	9	LCRUST	Decapod		7.772	26.645	11.6224
OP6CE5	BCCE	100 - 200	n	16.5273	9	LCRUST	Decapod		5.621	29.822	17.8057
OP6CE5	BCCE	100 - 200	n	16.5273	9	LCRUST	Decapod		5.683	20.814	4.56144
OP6CE5	BCCE	100 - 200	n	16.5273	9	LCRUST	Decapod		5.066	21.121	4.82151
OP6CE5	BCCE	100 - 200	n	16.5273	9	LCRUST	Decapod		6.808	21.474	5.13385
OP6CE5	BCCE	100 - 200	n	16.5273	9	LCRUST	Decapod		6.733	24.238	8.12042
OP6CE5	BCCE	100 - 200	n	16.5273	9	LCRUST	Decapod		7.462	21.832	5.46558
OP6CE5	BCCE	100 - 200	n	16.5273	9	LCRUST	Decapod		10.359	24.261	8.14964
OP6CE5	BCCE	100 - 200	n	16.5273	9	LCRUST	Decapod		8.561	27.355	12.8395
OP6CE5	BCCE	100 - 200	n	16.5273	9	LCRUST	Decapod		7.823	27.6	13.2804
OP6CE5	BCCE	100 - 200	n	16.5273	9	LCRUST	Decapod		6.614	22.441	6.06577
OP6CE5	BCCE	100 - 200	n	16.5273	9	LCRUST	Decapod		6.964	21.134	4.83276
OP6CE5	BCCE	100 - 200	n	16.5273	9	LCRUST	Decapod		8.267	26.162	10.8445
OP6CE5	BCCE	100 - 200	n	16.5273	9	LCRUST	Decapod		7.03	20.218	4.0862
OP6CE5	BCCE	100 - 200	n	16.5273	9	LCRUST	Decapod		7.616	22.886	6.53402
OP6CE5	BCCE	100 - 200	n	16.5273	9	LCRUST	Decapod		7.746	23.533	7.26158
OP6CE5	BCCE	100 - 200	n	16.5273	9	LCRUST	Decapod		6.48	21.556	5.20849
OP6CE5	BCCE	100 - 200	n	16.5273	9	LCRUST	Decapod		7.9	27.046	12.2988
OP6CE5	BCCE	100 - 200	n	16.5273	9	LCRUST	Decapod		5.579	25.087	9.25128
OP6CE5	BCCE	100 - 200	n	16.5273	9	LCRUST	Decapod		4.761	22.763	6.40203
OP6CE5	BCCE	100 - 200	n	16.5273	9	LCRUST	Decapod		4.362	23.415	7.12465
OP6CE5	BCCE	100 - 200	n	16.5273	9	LCRUST	Decapod		5.307	22.38	6.00357
OP6CE5	BCCE	100 - 200	n	16.5273	9	LCRUST	Decapod		5.726	23.095	6.76288
OP6CE5	BCCE	100 - 200	n	16.5273	9	LCRUST	Decapod		8.349	27.582	13.2477
OP6CE5	BCCE	100 - 200	n	16.5273	9	LCRUST	Decapod		7.591	25.616	10.012
OP6CE5	BCCE	100 - 200	n	16.5273	9	LCRUST	Decapod		5.839	20.039	3.95088
OP6CE5	BCCE	100 - 200	n	16.5273	9	LCRUST	Decapod		3.318	22.347	5.97011
OP6CE5	BCCE	100 - 200	n	16.5273	9	LCRUST	Decapod		7.823	33.458	27.5277
OP6CE5	BCCE	100 - 200	n	16.5273	9	LCRUST	Decapod		10.836	30.996	20.6093
OP6CE5	BCCE	100 - 200	n	16.5273	9	LCRUST	Decapod		9.076	28.234	14.4732
OP6CE5	BCCE	100 - 200	n	16.5273	9	LCRUST	Decapod		6.871	27.078	12.354
OP6CE5	BCCE	100 - 200	n	16.5273	9	LCRUST	Decapod		10.472	25.836	10.3416
OP6CE5	BCCE	100 - 200	n	16.5273	9	LCRUST	Decapod		10.272	33.49	27.6276
OP6CE5	BCCE	100 - 200	n	16.5273	9	LCRUST	Decapod		9.218	27.628	13.3315
OP6CE5	BCCE	100 - 200	n	16.5273	9	LCRUST	Decapod		10.804	28.369	14.737
OP6CE5	BCCE	100 - 200	n	16.5273	9	LCRUST	Decapod		9.949	34.555	31.105
OP6CE5	BCCE	100 - 200	n	16.5273	9	LCRUST	Decapod		11.2	25.144	9.33113
OP6CE5	BCCE	100 - 200	n	16.5273	9	LCRUST	Decapod		6.985	24.55	8.52343
OP6CE5	BCCE	100 - 200	n	16.5273	9	LCRUST	Decapod		9.366	31.456	21.7918
OP6CE5	BCCE	100 - 200	n	16.5273	9	LCRUST	Decapod		8.904	26.668	11.6604
OP6CE5	BCCE	100 - 200	n	16.5273	9	LCRUST	Decapod		10.701	27.634	13.3425
OP6CE5	BCCE	100 - 200	n	16.5273	9	LCRUST	Decapod		7.473	27.642	13.3571
OP6CE5	BCCE	100 - 200	n	16.5273	9	LCRUST	Decapod		5.726	33.824	28.6856
OP6CE5	BCCE	100 - 200	n	16.5273	9	LCRUST	Decapod		8.844	25.157	9.34941
OP6CE5	BCCE	100 - 200	n	16.5273	9	SLEND	Gempylidae	Diplospinus multistriatus	44.241		10.2791
OP6CE5	BCCE	100 - 200	n	16.5273	9	SLEND	Gempylidae	Diplospinus multistriatus	39.848		7.41734
OP6CE5	BCCE	100 - 200	n	16.5273	9	SLEND	Paralepididae	Paralepididae	79.231		44.5787
OP6CE5	BCCE	100 - 200	n	16.5273	9	SLEND	Paralepididae	Paralepididae	47.25	49.29	10.3552
OP6CE5	BCCE	100 - 200	n	16.5273	9	SLEND	Paralepididae	Paralepididae	72.024		34.0536
OP6CE5	BCCE	100 - 200	n	16.5273	9	SLEND	Paralepididae	Paralepididae	61.52		21.8187
OP6CE5	BCCE	100 - 200	n	16.5273	9	SLEND	Paralepididae	Paralepididae	63.44		23.797
OP6CE5	BCCE	100 - 200	n	16.5273	9	SLEND	Paralepididae	Paralepididae	50.72		12.6495
OP6CE5	BCCE	100 - 200	n	16.5273	9	SLEND	Paralepididae	Paralepididae	33.22		3.82895
OP6CE5	BCCE	100 - 200	n	16.5273	9	SLEND	Paralepididae	Paralepididae	38.6		5.85019
OP6CE5	BCCE	100 - 200	n	16.5273	9	SLEND	Paralepididae	Paralepididae	46.15		9.68877
OP6CE5	BCCE	100 - 200	n	16.5273	9	SLEND	Gonostomatidae	Sigmops elongatus	47.03	51.487	0.0233034
OP6CE5	BCCE	100 - 200	n	16.5273	9	SLEND	Gonostomatidae	Sigmops elongatus	49.905	54.267	0.027753
OP6CE5	BCCE	100 - 200	n	16.5273	9	SLEND	Gonostomatidae	Sigmops elongatus	56.643	63.806	0.0402987
OP6CE5	BCCE	100 - 200	n	16.5273	9	SLEND	Gonostomatidae	Sigmops elongatus	57.068	63.283	0.0411957
OP6CE5	BCCE	100 - 200	n	16.5273	9	SLEND	Gonostomatidae	Sigmops elongatus	49.758	54.842	0.0275129
OP6CE5	BCCE	100 - 200	n	16.5273	9	SLEND	Gonostomatidae	Sigmops elongatus	31.018	34.285	0.00684035
OP6CE5	BCCE	100 - 200	n	16.5273	9	SLEND	Gonostomatidae	Sigmops elongatus	36.329	40.301	0.0108949
OP6CE5	BCCE	100 - 200	n	16.5273	9	SLEND	Gonostomatidae	Sigmops elongatus	35.963	39.723	0.0105748
OP6CE5	BCCE	100 - 200	n	16.5273	9	SLEND	Gonostomatidae	Sigmops elongatus	35.355	39.493	0.0100569
OP6CE5	BCCE	100 - 200	n	16.5273	9	SLEND	Gonostomatidae	Sigmops elongatus	61.086	64.943	0.0503355
OP6CE5	BCCE	100 - 200	n	16.5273	9	SLEND	Gonostomatidae	Sigmops elongatus	45.06	50.592	0.0205443
OP6CE5	BCCE	100 - 200	n	16.5273	9	SLEND	Gonostomatidae	Sigmops elongatus	64.717	71.804	0.0596657
OP6CE5	BCCE	100 - 200	n	16.5273	9	SLEND	Paralepididae	Stemonosudis sp	171.79	182.6	396.535
OP6CE5	BCCE	100 - 200	n	16.5273	9	LARV	Ceratiidae	Ceratioid	22.226	23.762	2.9097
OP6CE5	BCCE	100 - 200	n	16.5273	9	FISH	Phosichthyidae	Vinciguerria poweriae	28.846	33.291	25.2807
OP6CE5	BCCE	100 - 200	n	16.5273	9	FISH	Phosichthyidae	Vinciguerria poweriae	32.928	38.804	43.1298
OP6CE5	BCCE	100 - 200	n	16.5273	9	FISH	Phosichthyidae	Vinciguerria poweriae	34.688	39.701	53.2166
OP6CE5	BCCE	100 - 200	n	16.5273	9	FISH	Phosichthyidae	Vinciguerria poweriae	35.506	40.813	58.4657
OP6CE5	BCCE	100 - 200	n	16.5273	9	FISH	Phosichthyidae	Vinciguerria poweriae	35.012	41.745	55.2514
OP6CE5	BCCE	100 - 200	n	16.5273	9	FISH	Phosichthyidae	Vinciguerria poweriae	35.865	42.3	60.8884
OP6CE5	BCCE	100 - 200	n	16.5273	9	FISH	Phosichthyidae	Vinciguerria poweriae	36.108	42.337	62.5707
OP6CE5	BCCE	100 - 200	n	16.5273	9	FISH	Phosichthyidae	Vinciguerria poweriae	34.921	42.488	54.674
OP6CE6	BCCE	0 - 100	n	19.6824	9	CEPHA	Cephalopod		20.591	20.591	47.1884
OP6CE6	BCCE	0 - 100	n	19.6824	9	CEPHA	Cephalopod		20.916	20.916	49.1579
OP6CE6	BCCE	0 - 100	n	19.6824	9	CEPHA	Cephalopod		27.597	27.597	101.371
OP6CE6	BCCE	0 - 100	n	19.6824	9	CEPHA	Cephalopod		22.584	22.584	60.0617
OP6CE6	BCCE	0 - 100	n	19.6824	9	CEPHA	Cephalopod		23.579	23.579	67.2182
OP6CE6	BCCE	0 - 100	n	19.6824	9	CEPHA	Cephalopod		50.546	50.546	492.209
OP6CE6	BCCE	0 - 100	n	19.6824	9	CEPHA	Cephalopod		74.381	74.381	1349.62
OP6CE6	BCCE	0 - 100	n	19.6824	9	CEPHA	Cephalopod		61.124	61.124	808.392
OP6CE6	BCCE	0 - 100	n	19.6824	9	CEPHA	Cephalopod		49.766	49.766	472.623
OP6CE6	BCCE	0 - 100	n	19.6824	9	CEPHA	Cephalopod		44.241	44.241	347.594
OP6CE6	BCCE	0 - 100	n	19.6824	9	CEPHA	Cephalopod		39.84	39.84	264.397
OP6CE6	BCCE	0 - 100	n	19.6824	9	CEPHA	Cephalopod		39.58	39.58	259.916
OP6CE6	BCCE	0 - 100	n	19.6824	9	MYCTO	Myctophidae	Diaphus sp	43.345	45.5123	82.639
OP6CE6	BCCE	0 - 100	n	19.6824	9	MYCTO	Myctophidae	Diaphus sp	63.131	66.2875	246.089
OP6CE6	BCCE	0 - 100	n	19.6824	9	MYCTO	Myctophidae	Diaphus sp	42.89	45.0345	80.1466
OP6CE6	BCCE	0 - 100	n	19.6824	9	MYCTO	Myctophidae	Diaphus sp	56.626	59.4573	179.49
OP6CE6	BCCE	0 - 100	n	19.6824	9	MYCTO	Myctophidae	Diaphus sp	58.836	61.7778	200.582
OP6CE6	BCCE	0 - 100	n	19.6824	9	MYCTO	Myctophidae	Diaphus sp	47.96	50.358	110.841
OP6CE6	BCCE	0 - 100	n	19.6824	9	MYCTO	Myctophidae	Diaphus sp	39.657	41.6398	63.8428
OP6CE6	BCCE	0 - 100	n	19.6824	9	MYCTO	Myctophidae	Diaphus sp	38.593	40.5227	58.9978
OP6CE6	BCCE	0 - 100	n	19.6824	9	MYCTO	Myctophidae	Diaphus sp	41.425	43.4962	72.4576
OP6CE6	BCCE	0 - 100	n	19.6824	9	MYCTO	Myctophidae	Diaphus sp	61.53	64.6065	228.412
OP6CE6	BCCE	0 - 100	n	19.6824	9	MYCTO	Myctophidae	Diaphus sp	41.565	43.6433	73.1705
OP6CE6	BCCE	0 - 100	n	19.6824	9	MYCTO	Myctophidae	Diaphus sp	41.648	43.7304	73.5953
OP6CE6	BCCE	0 - 100	n	19.6824	9	MYCTO	Myctophidae	Diaphus sp	35.275	37.0388	45.4503
OP6CE6	BCCE	0 - 100	n	19.6824	9	MYCTO	Myctophidae	Diaphus sp	42.741	44.8781	79.3413
OP6CE6	BCCE	0 - 100	n	19.6824	9	MYCTO	Myctophidae	Diaphus sp	29.567	31.0454	27.2314
OP6CE6	BCCE	0 - 100	n	19.6824	9	MYCTO	Myctophidae	Diaphus sp	60.578	63.6069	218.306
OP6CE6	BCCE	0 - 100	n	19.6824	9	MYCTO	Myctophidae	Diaphus sp	37.599	39.4789	54.6952
OP6CE6	BCCE	0 - 100	n	19.6824	9	MYCTO	Myctophidae	Diaphus sp	43.331	45.4976	82.5615
OP6CE6	BCCE	0 - 100	n	19.6824	9	MYCTO	Myctophidae	Diaphus sp	60.128	63.1344	213.633
OP6CE6	BCCE	0 - 100	n	19.6824	9	MYCTO	Myctophidae	Diaphus sp	49.468	51.9414	121.26
OP6CE6	BCCE	0 - 100	n	19.6824	9	MYCTO	Myctophidae	Diaphus sp	54.785	57.5243	163.074
OP6CE6	BCCE	0 - 100	n	19.6824	9	MYCTO	Myctophidae	Diaphus sp	48.823	51.2642	116.728
OP6CE6	BCCE	0 - 100	n	19.6824	9	MYCTO	Myctophidae	Diaphus sp	39.065	41.0183	61.1162
OP6CE6	BCCE	0 - 100	n	19.6824	9	MYCTO	Myctophidae	Diaphus sp	42.025	44.1262	75.5453
OP6CE6	BCCE	0 - 100	n	19.6824	9	MYCTO	Myctophidae	Diaphus sp	28.018	29.4189	23.2943
OP6CE6	BCCE	0 - 100	n	19.6824	9	MYCTO	Myctophidae	Diaphus sp	35.934	37.7307	47.9584
OP6CE6	BCCE	0 - 100	n	19.6824	9	MYCTO	Myctophidae	Diaphus sp	62.17	65.2785	235.375
OP6CE6	BCCE	0 - 100	n	19.6824	9	MYCTO	Myctophidae	Diaphus sp	31.574	33.1527	32.949
OP6CE6	BCCE	0 - 100	n	19.6824	9	MYCTO	Myctophidae	Diaphus sp	26.856	28.1988	20.5999
OP6CE6	BCCE	0 - 100	n	19.6824	9	MYCTO	Myctophidae	Diaphus sp	41.361	43.429	72.1332
OP6CE6	BCCE	0 - 100	n	19.6824	9	MYCTO	Myctophidae	Diaphus sp	49.064	51.5172	118.408
OP6CE6	BCCE	0 - 100	n	19.6824	9	MYCTO	Myctophidae	Diaphus sp	38.803	40.7431	59.9342
OP6CE6	BCCE	0 - 100	n	19.6824	9	MYCTO	Myctophidae	Diaphus sp	42.763	44.9012	79.4598
OP6CE6	BCCE	0 - 100	n	19.6824	9	MYCTO	Myctophidae	Diaphus sp	64.27	67.4835	259.196
OP6CE6	BCCE	0 - 100	n	19.6824	9	MYCTO	Myctophidae	Diaphus sp	51.888	54.4824	139.287
OP6CE6	BCCE	0 - 100	n	19.6824	9	MYCTO	Myctophidae	Diaphus sp	62.754	65.8917	241.848
OP6CE6	BCCE	0 - 100	n	19.6824	9	MYCTO	Myctophidae	Diaphus sp	24.206	25.4163	15.2382
OP6CE6	BCCE	0 - 100	n	19.6824	9	MYCTO	Myctophidae	Diaphus sp	24.256	25.4688	15.3297
OP6CE6	BCCE	0 - 100	n	19.6824	9	MYCTO	Myctophidae	Diaphus sp	28.044	29.4462	23.3571
OP6CE6	BCCE	0 - 100	n	19.6824	9	MYCTO	Myctophidae	Diaphus sp	33.596	35.2758	39.4525
OP6CE6	BCCE	0 - 100	n	19.6824	9	MYCTO	Myctophidae	Diaphus sp	21.847	22.9394	11.3163
OP6CE6	BCCE	0 - 100	n	19.6824	9	MYCTO	Myctophidae	Diaphus sp	20.782	21.8211	9.78851
OP6CE6	BCCE	0 - 100	n	19.6824	9	MYCTO	Myctophidae	Diaphus sp	32.501	34.126	35.8354
OP6CE6	BCCE	0 - 100	n	19.6824	9	MYCTO	Myctophidae	Diaphus sp	28.503	29.9282	24.4839
OP6CE6	BCCE	0 - 100	n	19.6824	9	MYCTO	Myctophidae	Diaphus sp	34.489	36.2135	42.5733
OP6CE6	BCCE	0 - 100	n	19.6824	9	MYCTO	Myctophidae	Diaphus sp	30.54	32.067	29.9142
OP6CE6	BCCE	0 - 100	n	19.6824	9	MYCTO	Myctophidae	Diaphus sp	27.112	28.4676	21.175
OP6CE6	BCCE	0 - 100	n	19.6824	9	MYCTO	Myctophidae	Diaphus sp	35.048	36.8004	44.6067
OP6CE6	BCCE	0 - 100	n	19.6824	9	MYCTO	Myctophidae	Diaphus sp	38.592	40.5216	58.9933
OP6CE6	BCCE	0 - 100	n	19.6824	9	MYCTO	Myctophidae	Diaphus sp	27.77	29.1585	22.701
OP6CE6	BCCE	0 - 100	n	19.6824	9	MYCTO	Myctophidae	Diaphus sp	28.23	29.6415	23.8095
OP6CE6	BCCE	0 - 100	n	19.6824	9	MYCTO	Myctophidae	Diaphus sp	26.137	27.4439	19.0399
OP6CE6	BCCE	0 - 100	n	19.6824	9	MYCTO	Myctophidae	Diaphus sp	26.675	28.0088	20.1996
OP6CE6	BCCE	0 - 100	n	19.6824	9	MYCTO	Myctophidae	Diaphus sp	24.879	26.123	16.5004
OP6CE6	BCCE	0 - 100	n	19.6824	9	MYCTO	Myctophidae	Diaphus sp	30.446	31.9683	29.6478
OP6CE6	BCCE	0 - 100	n	19.6824	9	MYCTO	Myctophidae	Diaphus sp	25.131	26.3876	16.9901
OP6CE6	BCCE	0 - 100	n	19.6824	9	MYCTO	Myctophidae	Diaphus sp	29.399	30.869	26.7848
OP6CE6	BCCE	0 - 100	n	19.6824	9	MYCTO	Myctophidae	Diaphus sp	21.156	22.2138	10.3085
OP6CE6	BCCE	0 - 100	n	19.6824	9	MYCTO	Myctophidae	Diaphus sp	27.765	29.1533	22.6891
OP6CE6	BCCE	0 - 100	n	19.6824	9	MYCTO	Myctophidae	Diaphus sp	19.104	20.0592	7.66674
OP6CE6	BCCE	0 - 100	n	19.6824	9	MYCTO	Myctophidae	Diaphus sp	25.53	26.8065	17.7848
OP6CE6	BCCE	0 - 100	n	19.6824	9	MYCTO	Myctophidae	Diaphus sp	24.566	25.7943	15.9052
OP6CE6	BCCE	0 - 100	n	19.6824	9	MYCTO	Myctophidae	Diaphus sp	24.854	26.0967	16.4523
OP6CE6	BCCE	0 - 100	n	19.6824	9	MYCTO	Myctophidae	Diaphus sp	26.729	28.0655	20.3185
OP6CE6	BCCE	0 - 100	n	19.6824	9	MYCTO	Myctophidae	Diaphus sp	25.958	27.2559	18.6639
OP6CE6	BCCE	0 - 100	n	19.6824	9	MYCTO	Myctophidae	Diaphus sp	23.991	25.1906	14.8487
OP6CE6	BCCE	0 - 100	n	19.6824	9	MYCTO	Myctophidae	Diaphus sp	33.341	35.0081	38.5897
OP6CE6	BCCE	0 - 100	n	19.6824	9	MYCTO	Myctophidae	Diaphus sp	30.232	31.7436	29.0471
OP6CE6	BCCE	0 - 100	n	19.6824	9	MYCTO	Myctophidae	Diaphus sp	33.657	35.3398	39.6607
OP6CE6	BCCE	0 - 100	n	19.6824	9	MYCTO	Myctophidae	Diaphus sp	48.02	50.421	111.244
OP6CE6	BCCE	0 - 100	n	19.6824	9	MYCTO	Myctophidae	Diaphus sp	62.887	66.0314	243.339
OP6CE6	BCCE	0 - 100	n	19.6824	9	MYCTO	Myctophidae	Diaphus sp	51.209	53.7695	134.064
OP6CE6	BCCE	0 - 100	n	19.6824	9	MYCTO	Myctophidae	Diaphus sp	42.422	44.5431	77.635
OP6CE6	BCCE	0 - 100	n	19.6824	9	MYCTO	Myctophidae	Diaphus sp	25.723	27.0092	18.1778
OP6CE6	BCCE	0 - 100	n	19.6824	9	MYCTO	Myctophidae	Diaphus sp	48.229	50.6405	112.654
OP6CE6	BCCE	0 - 100	n	19.6824	9	MYCTO	Myctophidae	Diaphus sp	36.688	38.5224	50.9374
OP6CE6	BCCE	0 - 100	n	19.6824	9	MYCTO	Myctophidae	Diaphus sp	26.718	28.0539	20.2942
OP6CE6	BCCE	0 - 100	n	19.6824	9	MYCTO	Myctophidae	Diaphus sp	26.79	28.1295	20.4534
OP6CE6	BCCE	0 - 100	n	19.6824	9	MYCTO	Myctophidae	Diaphus sp	33.839	35.5309	40.2863
OP6CE6	BCCE	0 - 100	n	19.6824	9	MYCTO	Myctophidae	Diaphus sp	53.644	56.3262	153.412
OP6CE6	BCCE	0 - 100	n	19.6824	9	MYCTO	Myctophidae	Diaphus sp	57.803	60.6932	190.532
OP6CE6	BCCE	0 - 100	n	19.6824	9	MYCTO	Myctophidae	Diaphus sp	34.532	36.2586	42.7275
OP6CE6	BCCE	0 - 100	n	19.6824	9	MYCTO	Myctophidae	Diaphus sp	38.19	40.0995	57.2276
OP6CE6	BCCE	0 - 100	n	19.6824	9	MYCTO	Myctophidae	Diaphus sp	21.752	22.8396	11.174
OP6CE6	BCCE	0 - 100	n	19.6824	9	MYCTO	Myctophidae	Diaphus sp	23.799	24.9889	14.5065
OP6CE6	BCCE	0 - 100	n	19.6824	9	MYCTO	Myctophidae	Diaphus sp	43.762	45.9501	84.9673
OP6CE6	BCCE	0 - 100	n	19.6824	9	MYCTO	Myctophidae	Diaphus sp	48.852	51.2946	116.93
OP6CE6	BCCE	0 - 100	n	19.6824	9	MYCTO	Myctophidae	Diaphus sp	46.657	48.9898	102.326
OP6CE6	BCCE	0 - 100	n	19.6824	9	MYCTO	Myctophidae	Diaphus sp	37.522	39.3981	54.3708
OP6CE6	BCCE	0 - 100	n	19.6824	9	MYCTO	Myctophidae	Diaphus sp	24.631	25.8626	16.0276
OP6CE6	BCCE	0 - 100	n	19.6824	9	MYCTO	Myctophidae	Diaphus sp	38.796	40.7358	59.9029
OP6CE6	BCCE	0 - 100	n	19.6824	9	MYCTO	Myctophidae	Diaphus sp	41.594	43.6737	73.3187
OP6CE6	BCCE	0 - 100	n	19.6824	9	MYCTO	Myctophidae	Diaphus sp	44.458	46.6809	88.9485
OP6CE6	BCCE	0 - 100	n	19.6824	9	MYCTO	Myctophidae	Diaphus sp	33.566	35.2443	39.3503
OP6CE6	BCCE	0 - 100	n	19.6824	9	MYCTO	Myctophidae	Diaphus sp	19.126	20.0823	7.69239
OP6CE6	BCCE	0 - 100	n	19.6824	9	MYCTO	Myctophidae	Diaphus sp	70.05	73.5525	332.784
OP6CE6	BCCE	0 - 100	n	19.6824	9	MYCTO	Myctophidae	Diaphus sp	39.843	41.8352	64.7157
OP6CE6	BCCE	0 - 100	n	19.6824	9	MYCTO	Myctophidae	Diaphus sp	43.87	46.0635	85.5772
OP6CE6	BCCE	0 - 100	n	19.6824	9	MYCTO	Myctophidae	Diaphus sp	21.987	23.0863	11.528
OP6CE6	BCCE	0 - 100	n	19.6824	9	MYCTO	Myctophidae	Diaphus sp	22.281	23.3951	11.981
OP6CE6	BCCE	0 - 100	n	19.6824	9	MYCTO	Myctophidae	Diaphus sp	57.706	60.5913	189.606
OP6CE6	BCCE	0 - 100	n	19.6824	9	MYCTO	Myctophidae	Diaphus sp	67.827	71.2184	303.053
OP6CE6	BCCE	0 - 100	n	19.6824	9	MYCTO	Myctophidae	Diaphus sp	52.976	55.6248	147.933
OP6CE6	BCCE	0 - 100	n	19.6824	9	MYCTO	Myctophidae	Diaphus sp	49.681	52.1651	122.781
OP6CE6	BCCE	0 - 100	n	19.6824	9	MYCTO	Myctophidae	Diaphus sp	61.808	64.8984	231.419
OP6CE6	BCCE	0 - 100	n	19.6824	9	MYCTO	Myctophidae	Diaphus sp	40.86	42.903	69.6267
OP6CE6	BCCE	0 - 100	n	19.6824	9	MYCTO	Myctophidae	Diaphus sp	48.614	51.0447	115.284
OP6CE6	BCCE	0 - 100	n	19.6824	9	MYCTO	Myctophidae	Diaphus sp	46.555	48.8828	101.678
OP6CE6	BCCE	0 - 100	n	19.6824	9	MYCTO	Myctophidae	Diaphus sp	36.767	38.6054	51.2563
OP6CE6	BCCE	0 - 100	n	19.6824	9	MYCTO	Myctophidae	Diaphus sp	38.986	40.9353	60.7582
OP6CE6	BCCE	0 - 100	n	19.6824	9	MYCTO	Myctophidae	Diaphus sp	41.107	43.1624	70.8552
OP6CE6	BCCE	0 - 100	n	19.6824	9	MYCTO	Myctophidae	Diaphus sp	36.422	38.2431	49.873
OP6CE6	BCCE	0 - 100	n	19.6824	9	MYCTO	Myctophidae	Diaphus sp	33.381	35.05	38.7242
OP6CE6	BCCE	0 - 100	n	19.6824	9	MYCTO	Myctophidae	Diaphus sp	27.096	28.4508	21.1387
OP6CE6	BCCE	0 - 100	n	19.6824	9	MYCTO	Myctophidae	Diaphus sp	26.812	28.1526	20.5021
OP6CE6	BCCE	0 - 100	n	19.6824	9	MYCTO	Myctophidae	Diaphus sp	23.372	24.5406	13.764
OP6CE6	BCCE	0 - 100	n	19.6824	9	MYCTO	Myctophidae	Diaphus sp	25.483	26.7572	17.69
OP6CE6	BCCE	0 - 100	n	19.6824	9	MYCTO	Myctophidae	Diaphus sp	26.737	28.0739	20.3362
OP6CE6	BCCE	0 - 100	n	19.6824	9	MYCTO	Myctophidae	Diaphus sp	26.326	27.6423	19.4422
OP6CE6	BCCE	0 - 100	n	19.6824	9	MYCTO	Myctophidae	Diaphus sp	28.47	29.8935	24.4017
OP6CE6	BCCE	0 - 100	n	19.6824	9	MYCTO	Myctophidae	Diaphus sp	34.813	36.5537	43.7443
OP6CE6	BCCE	0 - 100	n	19.6824	9	MYCTO	Myctophidae	Diaphus sp	27.64	29.022	22.394
OP6CE6	BCCE	0 - 100	n	19.6824	9	MYCTO	Myctophidae	Diaphus sp	29.31	30.7755	26.5502
OP6CE6	BCCE	0 - 100	n	19.6824	9	MYCTO	Myctophidae	Diaphus sp	30.559	32.087	29.9683
OP6CE6	BCCE	0 - 100	n	19.6824	9	MYCTO	Myctophidae	Diaphus sp	46.321	48.6371	100.202
OP6CE6	BCCE	0 - 100	n	19.6824	9	MYCTO	Myctophidae	Diaphus sp	48.664	51.0972	115.628
OP6CE6	BCCE	0 - 100	n	19.6824	9	MYCTO	Myctophidae	Diaphus sp	49.835	52.3268	123.889
OP6CE6	BCCE	0 - 100	n	19.6824	9	MYCTO	Myctophidae	Diaphus sp	24.127	25.3333	15.0943
OP6CE6	BCCE	0 - 100	n	19.6824	9	MYCTO	Myctophidae	Diaphus sp	63.827	67.0183	254.045
OP6CE6	BCCE	0 - 100	n	19.6824	9	MYCTO	Myctophidae	Diaphus sp	47.862	50.2551	110.185
OP6CE6	BCCE	0 - 100	n	19.6824	9	MYCTO	Myctophidae	Diaphus sp	38.227	40.1383	57.3887
OP6CE6	BCCE	0 - 100	n	19.6824	9	MYCTO	Myctophidae	Diaphus sp	48.525	50.9513	114.673
OP6CE6	BCCE	0 - 100	n	19.6824	9	MYCTO	Myctophidae	Diaphus sp	47.417	49.7879	107.238
OP6CE6	BCCE	0 - 100	n	19.6824	9	MYCTO	Myctophidae	Diaphus sp	39.145	41.1023	61.4801
OP6CE6	BCCE	0 - 100	n	19.6824	9	MYCTO	Myctophidae	Diaphus sp	39.318	41.2839	62.2719
OP6CE6	BCCE	0 - 100	n	19.6824	9	MYCTO	Myctophidae	Diaphus sp	24.287	25.5013	15.3866
OP6CE6	BCCE	0 - 100	n	19.6824	9	MYCTO	Myctophidae	Diaphus sp	46.615	48.9458	102.059
OP6CE6	BCCE	0 - 100	n	19.6824	9	MYCTO	Myctophidae	Diaphus sp	37.946	39.8433	56.173
OP6CE6	BCCE	0 - 100	n	19.6824	9	MYCTO	Myctophidae	Diaphus sp	34.413	36.1336	42.3016
OP6CE6	BCCE	0 - 100	n	19.6824	9	MYCTO	Myctophidae	Diaphus sp	31.582	33.1611	32.9732
OP6CE6	BCCE	0 - 100	n	19.6824	9	MYCTO	Myctophidae	Diaphus sp	39.228	41.1894	61.8591
OP6CE6	BCCE	0 - 100	n	19.6824	9	MYCTO	Myctophidae	Diaphus sp	66.843	70.1852	290.469
OP6CE6	BCCE	0 - 100	n	19.6824	9	MYCTO	Myctophidae	Diaphus sp	66.772	70.1106	289.575
OP6CE6	BCCE	0 - 100	n	19.6824	9	MYCTO	Myctophidae	Diaphus sp	69.901	73.3961	330.734
OP6CE6	BCCE	0 - 100	n	19.6824	9	MYCTO	Myctophidae	Diaphus sp	65.8	69.09	277.51
OP6CE6	BCCE	0 - 100	n	19.6824	9	MYCTO	Myctophidae	Diaphus sp	53.055	55.7078	148.574
OP6CE6	BCCE	0 - 100	n	19.6824	9	MYCTO	Myctophidae	Diaphus sp	67.244	70.6062	295.555
OP6CE6	BCCE	0 - 100	n	19.6824	9	MYCTO	Myctophidae	Diaphus sp	78.044	81.9462	455.362
OP6CE6	BCCE	0 - 100	n	19.6824	9	MYCTO	Myctophidae	Diaphus sp	73.39	77.0595	380.948
OP6CE6	BCCE	0 - 100	n	19.6824	9	MYCTO	Myctophidae	Diaphus sp	62.608	65.7384	240.219
OP6CE6	BCCE	0 - 100	n	19.6824	9	MYCTO	Myctophidae	Diaphus sp	68.94	72.387	317.71
OP6CE6	BCCE	0 - 100	n	19.6824	9	MYCTO	Myctophidae	Diaphus sp	73.202	76.8621	378.123
OP6CE6	BCCE	0 - 100	n	19.6824	9	MYCTO	Myctophidae	Diaphus sp	63.241	66.4031	247.335
OP6CE6	BCCE	0 - 100	n	19.6824	9	MYCTO	Myctophidae	Diaphus sp	64.242	67.4541	258.868
OP6CE6	BCCE	0 - 100	n	19.6824	9	MYCTO	Myctophidae	Diaphus sp	41.348	43.4154	72.0674
OP6CE6	BCCE	0 - 100	n	19.6824	9	HATCH	Sternoptychidae	Argyropelecus aculeatus	48.142	59.8728	166.57
OP6CE6	BCCE	0 - 100	n	19.6824	9	HATCH	Sternoptychidae	Argyropelecus aculeatus	37.168	46.2247	77.6516
OP6CE6	BCCE	0 - 100	n	19.6824	9	HATCH	Sternoptychidae	Argyropelecus aculeatus	36.357	45.2161	72.7589
OP6CE6	BCCE	0 - 100	n	19.6824	9	HATCH	Sternoptychidae	Argyropelecus aculeatus	31.642	39.3522	48.2981
OP6CE6	BCCE	0 - 100	n	19.6824	9	HATCH	Sternoptychidae	Argyropelecus aculeatus	28.507	35.4533	35.5024
OP6CE6	BCCE	0 - 100	n	19.6824	9	HATCH	Sternoptychidae	Argyropelecus aculeatus	23.457	29.1728	19.9735
OP6CE6	BCCE	0 - 100	n	19.6824	9	HATCH	Sternoptychidae	Argyropelecus aculeatus	22.05	27.4229	16.642
OP6CE6	BCCE	0 - 100	n	19.6824	9	HATCH	Sternoptychidae	Argyropelecus aculeatus	50.148	62.3676	187.888
OP6CE6	BCCE	0 - 100	n	19.6824	9	HATCH	Sternoptychidae	Argyropelecus aculeatus	40.121	49.8973	97.2967
OP6CE6	BCCE	0 - 100	n	19.6824	9	HATCH	Sternoptychidae	Argyropelecus aculeatus	41.301	51.3648	105.983
OP6CE6	BCCE	0 - 100	n	19.6824	9	HATCH	Sternoptychidae	Argyropelecus aculeatus	32.57	40.5063	52.5973
OP6CE6	BCCE	0 - 100	n	19.6824	9	HATCH	Sternoptychidae	Argyropelecus aculeatus	26.67	33.1687	29.1688
OP6CE6	BCCE	0 - 100	n	19.6824	9	HATCH	Sternoptychidae	Argyropelecus aculeatus	25.012	31.1067	24.1373
OP6CE6	BCCE	0 - 100	n	19.6824	9	HATCH	Sternoptychidae	Argyropelecus aculeatus	22.445	27.9142	17.537
OP6CE6	BCCE	0 - 100	n	19.6824	9	HATCH	Sternoptychidae	Argyropelecus aculeatus	44.204	54.9752	129.498
OP6CE6	BCCE	0 - 100	n	19.6824	9	HATCH	Sternoptychidae	Argyropelecus aculeatus	34.31	42.6703	61.3257
OP6CE6	BCCE	0 - 100	n	19.6824	9	HATCH	Sternoptychidae	Argyropelecus aculeatus	33.01	41.0535	54.7212
OP6CE6	BCCE	0 - 100	n	19.6824	9	HATCH	Sternoptychidae	Argyropelecus aculeatus	28.479	35.4185	35.3997
OP6CE6	BCCE	0 - 100	n	19.6824	9	HATCH	Sternoptychidae	Argyropelecus aculeatus	33.245	41.3458	55.8784
OP6CE6	BCCE	0 - 100	n	19.6824	9	HATCH	Sternoptychidae	Argyropelecus aculeatus	27.076	33.6736	30.4983
OP6CE6	BCCE	0 - 100	n	19.6824	9	HATCH	Sternoptychidae	Argyropelecus aculeatus	23.358	29.0496	19.7259
OP6CE6	BCCE	0 - 100	n	19.6824	9	HATCH	Sternoptychidae	Argyropelecus aculeatus	22.369	27.8197	17.3624
OP6CE6	BCCE	0 - 100	n	19.6824	9	HATCH	Sternoptychidae	Argyropelecus aculeatus	38.634	48.0479	87.0386
OP6CE6	BCCE	0 - 100	n	19.6824	9	HATCH	Sternoptychidae	Argyropelecus aculeatus	29.746	36.9942	40.25
OP6CE6	BCCE	0 - 100	n	19.6824	9	HATCH	Sternoptychidae	Argyropelecus aculeatus	27.573	34.2917	32.1795
OP6CE6	BCCE	0 - 100	n	19.6824	9	HATCH	Sternoptychidae	Argyropelecus aculeatus	22.216	27.6294	17.0144
OP6CE6	BCCE	0 - 100	n	19.6824	9	HATCH	Sternoptychidae	Argyropelecus aculeatus	23.698	29.4725	20.585
OP6CE6	BCCE	0 - 100	n	19.6824	9	HATCH	Sternoptychidae	Argyropelecus aculeatus	22.759	28.3047	18.2706
OP6CE6	BCCE	0 - 100	n	19.6824	9	HATCH	Sternoptychidae	Argyropelecus aculeatus	20.2	25.1221	12.851
OP6CE6	BCCE	0 - 100	n	19.6824	9	HATCH	Sternoptychidae	Argyropelecus aculeatus	20.779	25.8422	13.9683
OP6CE6	BCCE	0 - 100	n	19.6824	9	HATCH	Sternoptychidae	Argyropelecus hemigymnus	19.047	25.0468	10.8054
OP6CE6	BCCE	0 - 100	n	19.6824	9	HATCH	Sternoptychidae	Argyropelecus hemigymnus	16.763	22.0433	7.41291
OP6CE6	BCCE	0 - 100	n	19.6824	9	HATCH	Sternoptychidae	Argyropelecus hemigymnus	17.458	22.9573	8.3567
OP6CE6	BCCE	0 - 100	n	19.6824	9	HATCH	Sternoptychidae	Argyropelecus hemigymnus	17.746	23.336	8.76996
OP6CE6	BCCE	0 - 100	n	19.6824	9	HATCH	Sternoptychidae	Argyropelecus hemigymnus	16.834	22.1367	7.50592
OP6CE6	BCCE	0 - 100	n	19.6824	9	HATCH	Sternoptychidae	Argyropelecus hemigymnus	18.702	24.5931	10.2381
OP6CE6	BCCE	0 - 100	n	19.6824	9	HATCH	Sternoptychidae	Argyropelecus hemigymnus	15.75	20.7112	6.16778
OP6CE6	BCCE	0 - 100	n	19.6824	9	HATCH	Sternoptychidae	Argyropelecus hemigymnus	20.094	26.4236	12.6531
OP6CE6	BCCE	0 - 100	n	19.6824	9	HATCH	Sternoptychidae	Argyropelecus hemigymnus	22.746	29.911	18.2398
OP6CE6	BCCE	0 - 100	n	19.6824	9	HATCH	Sternoptychidae	Argyropelecus hemigymnus	27.598	36.2914	32.2656
OP6CE6	BCCE	0 - 100	n	19.6824	9	HATCH	Sternoptychidae	Argyropelecus hemigymnus	17.117	22.5089	7.88429
OP6CE6	BCCE	0 - 100	n	19.6824	9	TOOTH	Stomiidae	Astronesthes sp	47.924	54.68	20.1721
OP6CE6	BCCE	0 - 100	n	19.6824	9	TOOTH	Stomiidae	Chauliodus sloani	79.42	84.452	72.0412
OP6CE6	BCCE	0 - 100	n	19.6824	9	TOOTH	Stomiidae	Chauliodus sloani	66.402	69.201	45.8833
OP6CE6	BCCE	0 - 100	n	19.6824	9	TOOTH	Stomiidae	Malacosteus niger	63.689	64.132	41.3048
OP6CE6	BCCE	0 - 100	n	19.6824	9	TOOTH	Stomiidae	Malacosteus niger	68.606	71.931	49.8185
OP6CE6	BCCE	0 - 100	n	19.6824	9	SLEND	Gempylidae	Neolatus tripes	52.708	59.15	17.7515
OP6CE6	BCCE	0 - 100	n	19.6824	9	SLEND	Gempylidae	Neolatus tripes	39.662	40.91	7.30985
OP6CE6	BCCE	0 - 100	n	19.6824	9	SCOPE	Myctophidae	Scopelopsis multipunctatus	59.34	70.51	205.609
OP6CE6	BCCE	0 - 100	n	19.6824	9	SCOPE	Myctophidae	Scopelopsis multipunctatus	61.256	75.516	225.472
OP6CE6	BCCE	0 - 100	n	19.6824	9	SLEND	Gonostomatidae	Sigmops elongatus	75.345	83.527	0.0933687
OP6CE6	BCCE	0 - 100	n	19.6824	9	SLEND	Gonostomatidae	Sigmops elongatus	39.642	43.14	0.0140878
OP6CE6	BCCE	0 - 100	n	19.6824	9	SLEND	Gonostomatidae	Sigmops elongatus	59.354	64.404	0.0462473
OP6CE6	BCCE	0 - 100	n	19.6824	9	SLEND	Gonostomatidae	Sigmops elongatus	29.969	31.814	0.00618124
OP6CE6	BCCE	0 - 100	n	19.6824	9	SLEND	Gonostomatidae	Sigmops elongatus	32.439	36.238	0.00780494
OP6CE6	BCCE	0 - 100	n	19.6824	9	SLEND	Gonostomatidae	Sigmops elongatus	34.638	37.489	0.00946801
OP6CE6	BCCE	0 - 100	n	19.6824	9	SLEND	Gonostomatidae	Sigmops elongatus	33.234	35.211	0.00838179
OP6CE6	BCCE	0 - 100	n	19.6824	9	SLEND	Gonostomatidae	Sigmops elongatus	55.584	60.928	0.03812
OP6CE6	BCCE	0 - 100	n	19.6824	9	SLEND	Gonostomatidae	Sigmops elongatus	36.289	39.692	0.0108596
OP6CE6	BCCE	0 - 100	n	19.6824	9	SLEND	Gonostomatidae	Sigmops elongatus	31.644		0.00725494
OP6CE6	BCCE	0 - 100	n	19.6824	9	HATCH	Sternoptychidae	Sternoptyx diaphana	13.698		8.67662
OP6CE6	BCCE	0 - 100	n	19.6824	9	FISH	Tetraodontidae	Lagocephalus sp	29.654	34.42	0.085691
OP6CE6	BCCE	0 - 100	n	19.6824	9	FISH	Phosichthyidae	Vinciguerria poweriae	35.253		56.8024
OP6CE6	BCCE	0 - 100	n	19.6824	9	FISH	Phosichthyidae	Vinciguerria poweriae	23.092		10.2995
OP6CE6	BCCE	0 - 100	n	19.6824	9	FISH	Phosichthyidae	Vinciguerria poweriae	33.567		46.6086
OP6CE6	BCCE	0 - 100	n	19.6824	9	FISH	Phosichthyidae	Vinciguerria poweriae	33.921		48.6245
OP6CE6	BCCE	0 - 100	n	19.6824	9	FISH	Phosichthyidae	Vinciguerria poweriae	39.125		86.5026
OP6CE6	BCCE	0 - 100	n	19.6824	9	FISH	Phosichthyidae	Vinciguerria poweriae	23.377		10.8222
OP6CE6	BCCE	0 - 100	n	19.6824	9	FISH	Phosichthyidae	Vinciguerria poweriae	26.328		17.486
OP6CE6	BCCE	0 - 100	n	19.6824	9	FISH	Phosichthyidae	Vinciguerria poweriae	25.819		16.1611
OP6CE6	BCCE	0 - 100	n	19.6824	9	FISH	Phosichthyidae	Vinciguerria poweriae	17.074		3.04501
OP6CE6	BCCE	0 - 100	n	19.6824	9	FISH	Phosichthyidae	Vinciguerria poweriae	35.624		59.2539
OP6CE6	BCCE	0 - 100	n	19.6824	9	TOOTH	Evermannellidae	Coccorella atlantica	108.729	120.614	3.4453
OP6CE6	BCCE	0 - 100	n	19.6824	9	DBFISH	Linophrynidae	Haplophryne mollis	40.46	47.66	13.1663
OP6CE6	BCCE	0 - 100	n	19.6824	9	CEPHA	Cephalopod		38.624	38.624	243.841
OP6CE6	BCCE	0 - 100	n	19.6824	9	CEPHA	Cephalopod		43.696	43.696	336.524
OP6CE6	BCCE	0 - 100	n	19.6824	9	CEPHA	Cephalopod		40.521	40.521	276.361
OP6CE6	BCCE	0 - 100	n	19.6824	9	CEPHA	Cephalopod		42.613	42.613	315.179
OP6CE6	BCCE	0 - 100	n	19.6824	9	CEPHA	Cephalopod		48.085	48.085	432.066
OP6CE6	BCCE	0 - 100	n	19.6824	9	CEPHA	Cephalopod		38.484	38.484	241.54
OP6CE6	BCCE	0 - 100	n	19.6824	9	CEPHA	Cephalopod		36.57	36.57	211.418
OP6CE6	BCCE	0 - 100	n	19.6824	9	CEPHA	Cephalopod		43.721	43.721	337.027
OP6CE6	BCCE	0 - 100	n	19.6824	9	CEPHA	Cephalopod		25.877	25.877	85.6922
OP6CE6	BCCE	0 - 100	n	19.6824	9	CEPHA	Cephalopod		60.337	60.337	781.497
OP6CE6	BCCE	0 - 100	n	19.6824	9	CEPHA	Cephalopod		88.698	88.698	2137.11
OP7CE3	BCCE	700 - 800	d	6.4918	11	CEPHA	Cephalopod		56.482	56.482	657.749
OP7CE3	BCCE	700 - 800	d	6.4918	11	CEPHA	Cephalopod		53.622	53.622	574.299
OP7CE3	BCCE	700 - 800	d	6.4918	11	CEPHA	Cephalopod		37.34	37.34	223.239
OP6CE6	BCCE	0 - 100	n	19.6824	9	LCRUST	Decapod			21.796	5.43153
OP6CE6	BCCE	0 - 100	n	19.6824	9	LCRUST	Decapod			28.458	14.9129
OP7CE3	BCCE	700 - 800	d	6.4918	11	CEPHA	Cephalopod		59.517	59.517	754.069
OP8CE5	BCCE	100 - 200	d	16.5273	11	CEPHA	Cephalopod		21.639	21.639	53.719
OP8CE5	BCCE	100 - 200	d	16.5273	11	CEPHA	Cephalopod		44.468	44.468	352.27
OP8CE5	BCCE	100 - 200	d	16.5273	11	CEPHA	Cephalopod		45.668	45.668	377.633
OP8CE5	BCCE	100 - 200	d	16.5273	11	CEPHA	Cephalopod		51.086	51.086	506.057
OP8CE5	BCCE	100 - 200	d	16.5273	11	CEPHA	Cephalopod		60.748	60.748	795.473
OP8CE5	BCCE	100 - 200	d	16.5273	11	CEPHA	Cephalopod		69.127	69.127	1114.66
OP8CE6	BCCE	0 - 100	d	19.6824	11	CEPHA	Cephalopod		26.162	26.162	88.1784
OP8CE6	BCCE	0 - 100	d	19.6824	11	CEPHA	Cephalopod		30.058	30.058	126.7
OP8CE6	BCCE	0 - 100	d	19.6824	11	CEPHA	Cephalopod		39.2861	39.2861	254.907
OP8CE6	BCCE	0 - 100	d	19.6824	11	CEPHA	Cephalopod		20.2485	20.2485	45.1663
OP8CE6	BCCE	0 - 100	d	19.6824	11	CEPHA	Cephalopod		37.8122	37.8122	230.685
OP8CE6	BCCE	0 - 100	d	19.6824	11	CEPHA	Cephalopod		36.2353	36.2353	206.403
OP8CE6	BCCE	0 - 100	d	19.6824	11	CEPHA	Cephalopod		35.5629	35.5629	196.552
OP8CE6	BCCE	0 - 100	d	19.6824	11	CEPHA	Cephalopod		54.7541	54.7541	606.498
OP8CE6	BCCE	0 - 100	d	19.6824	11	CEPHA	Cephalopod		52.0809	52.0809	532.195
OP8CE6	BCCE	0 - 100	d	19.6824	11	CEPHA	Cephalopod		36.433	36.433	209.357
OP8CE6	BCCE	0 - 100	d	19.6824	11	CEPHA	Cephalopod		57.9424	57.9424	703.084
OP8CE6	BCCE	0 - 100	d	19.6824	11	CEPHA	Cephalopod		44.7597	44.7597	358.335
OP8CE6	BCCE	0 - 100	d	19.6824	11	CEPHA	Cephalopod		29.6112	29.6112	121.841
OP8CE6	BCCE	0 - 100	d	19.6824	11	CEPHA	Cephalopod		33.1952	33.1952	164.192
OP8CE6	BCCE	0 - 100	d	19.6824	11	CEPHA	Cephalopod		37.5766	37.5766	226.951
OP10CE2	RWCE	400 - 500	d	17.2864	11.5	CEPHA	Cephalopod		25.007	25.007	78.3722
OP10CE2	RWCE	400 - 500	d	17.2864	11.5	CEPHA	Cephalopod		22.862	22.862	62.0112
OP10CE2	RWCE	400 - 500	d	17.2864	11.5	CEPHA	Cephalopod		27.979	27.979	105.076
OP6CE6	BCCE	0 - 100	n	19.6824	9	LCRUST	Decapod		20.508	62.98	302.044
OP6CE6	BCCE	0 - 100	n	19.6824	9	LCRUST	Decapod		15.546	47.82	106.456
OP6CE6	BCCE	0 - 100	n	19.6824	9	LCRUST	Decapod		18.2	55.668	189.277
OP6CE6	BCCE	0 - 100	n	19.6824	9	LCRUST	Decapod		15.713	48.824	115.171
OP6CE6	BCCE	0 - 100	n	19.6824	9	LCRUST	Decapod		15.386	54.852	178.983
OP6CE6	BCCE	0 - 100	n	19.6824	9	LCRUST	Decapod		5.302	23.826	7.60995
OP6CE6	BCCE	0 - 100	n	19.6824	9	LCRUST	Decapod		17.048	58.178	223.682
OP6CE6	BCCE	0 - 100	n	19.6824	9	LCRUST	Decapod		18.442	59.573	244.682
OP6CE6	BCCE	0 - 100	n	19.6824	9	LCRUST	Decapod		7.131	30.936	20.4587
OP6CE6	BCCE	0 - 100	n	19.6824	9	LCRUST	Decapod		4.897	20.603	4.38878
OP6CE6	BCCE	0 - 100	n	19.6824	9	LCRUST	Decapod		4.784	20.622	4.40413
OP6CE6	BCCE	0 - 100	n	19.6824	9	LCRUST	Decapod		15.476	53.987	168.527
OP6CE6	BCCE	0 - 100	n	19.6824	9	LCRUST	Decapod		20.822	62.52	293.774
OP6CE6	BCCE	0 - 100	n	19.6824	9	LCRUST	Decapod		10.862	36.766	39.34
OP6CE6	BCCE	0 - 100	n	19.6824	9	LCRUST	Decapod		13.11	37.677	43.1609
OP6CE6	BCCE	0 - 100	n	19.6824	9	LCRUST	Decapod		7.602	32.041	23.3667
OP6CE6	BCCE	0 - 100	n	19.6824	9	LCRUST	Decapod		10.047	30.096	18.4333
OP6CE6	BCCE	0 - 100	n	19.6824	9	LCRUST	Decapod		10.017	41.312	61.1744
OP6CE6	BCCE	0 - 100	n	19.6824	9	LCRUST	Decapod		6.559	23.037	6.69879
OP6CE6	BCCE	0 - 100	n	19.6824	9	LCRUST	Decapod		14.139	42.392	67.4549
OP6CE6	BCCE	0 - 100	n	19.6824	9	LCRUST	Decapod		6.881	21.079	4.7853
OP6CE6	BCCE	0 - 100	n	19.6824	9	LCRUST	Decapod		5.803	23.632	7.37795
OP6CE6	BCCE	0 - 100	n	19.6824	9	LCRUST	Decapod		8.789	27.614	13.306
OP6CE6	BCCE	0 - 100	n	19.6824	9	LCRUST	Decapod		20.307	68.98	426.318
OP6CE6	BCCE	0 - 100	n	19.6824	9	LCRUST	Decapod		10.538	30.787	20.088
OP6CE6	BCCE	0 - 100	n	19.6824	9	LCRUST	Decapod		8.535	28.539	15.0743
OP6CE6	BCCE	0 - 100	n	19.6824	9	LCRUST	Decapod		15.993	48.74	114.423
OP6CE6	BCCE	0 - 100	n	19.6824	9	LCRUST	Decapod		11.887	42.369	67.3164
OP6CE6	BCCE	0 - 100	n	19.6824	9	LCRUST	Decapod		18.54	69.522	439.143
OP6CE6	BCCE	0 - 100	n	19.6824	9	LCRUST	Decapod		10.486	42.397	67.485
OP6CE6	BCCE	0 - 100	n	19.6824	9	LCRUST	Decapod		17.462	61.072	268.827
OP6CE6	BCCE	0 - 100	n	19.6824	9	LCRUST	Decapod		8.647	27.54	13.1714
OP6CE6	BCCE	0 - 100	n	19.6824	9	LCRUST	Decapod		12.792	69.134	429.934
OP6CE6	BCCE	0 - 100	n	19.6824	9	LCRUST	Decapod		20.895	59.395	241.925
OP6CE6	BCCE	0 - 100	n	19.6824	9	LCRUST	Decapod		17.078	52.931	156.379
OP6CE6	BCCE	0 - 100	n	19.6824	9	LCRUST	Decapod		11.49	28.153	14.3166
OP10CE3	RWCE	300 - 400	d	18.9244	11.5	CEPHA	Cephalopod		30.721	30.721	134.127
OP10CE3	RWCE	300 - 400	d	18.9244	11.5	CEPHA	Cephalopod		24.932	24.932	77.76
OP10CE3	RWCE	300 - 400	d	18.9244	11.5	CEPHA	Cephalopod		21.336	21.336	51.777
OP10CE4	RWCE	200 - 300	d	19.5383	11.5	CEPHA	Cephalopod		24.351	24.351	73.117
OP10CE4	RWCE	200 - 300	d	19.5383	11.5	CEPHA	Cephalopod		25.416	25.416	81.7632
OP10CE4	RWCE	200 - 300	d	19.5383	11.5	CEPHA	Cephalopod		21.113	21.113	50.3759
OP10CE5	RWCE	100 - 200	d	19.7971	11.5	CEPHA	Cephalopod		46.617	46.617	398.467
OP10CE5	RWCE	100 - 200	d	19.7971	11.5	CEPHA	Cephalopod		78.074	78.074	1531.64
OP10CE5	RWCE	100 - 200	d	19.7971	11.5	CEPHA	Cephalopod		26.821	26.821	94.096
OP10CE5	RWCE	100 - 200	d	19.7971	11.5	CEPHA	Cephalopod		52.442	52.442	541.883
OP10CE5	RWCE	100 - 200	d	19.7971	11.5	CEPHA	Cephalopod		40.001	40.001	267.196
OP10CE5	RWCE	100 - 200	d	19.7971	11.5	CEPHA	Cephalopod		25.51	25.51	82.5552
OP10CE5	RWCE	100 - 200	d	19.7971	11.5	CEPHA	Cephalopod		30.706	30.706	133.956
OP10CE5	RWCE	100 - 200	d	19.7971	11.5	CEPHA	Cephalopod		23.167	23.167	64.1946
OP10CE5	RWCE	100 - 200	d	19.7971	11.5	CEPHA	Cephalopod		33.11	33.11	163.093
OP10CE5	RWCE	100 - 200	d	19.7971	11.5	CEPHA	Cephalopod		29.753	29.753	123.371
OP10CE5	RWCE	100 - 200	d	19.7971	11.5	CEPHA	Cephalopod		33.703	33.703	170.831
OP10CE5	RWCE	100 - 200	d	19.7971	11.5	CEPHA	Cephalopod		33.836	33.836	172.596
OP10CE5	RWCE	100 - 200	d	19.7971	11.5	CEPHA	Cephalopod		24.336	24.336	72.9995
OP10CE5	RWCE	100 - 200	d	19.7971	11.5	CEPHA	Cephalopod		28.409	28.409	109.344
OP10CE5	RWCE	100 - 200	d	19.7971	11.5	CEPHA	Cephalopod		65.669	65.669	974.88
OP10CE5	RWCE	100 - 200	d	19.7971	11.5	CEPHA	Cephalopod		22.627	22.627	60.3607
OP11CE3	RWCE	700 - 800	n	10.407	10	CEPHA	Cephalopod		31.868	31.868	147.599
OP11CE4	RWCE	600 - 700	n	12.6541	10	CEPHA	Cephalopod		26.318	26.318	89.5578
OP11CE4	RWCE	600 - 700	n	12.6541	10	CEPHA	Cephalopod		27.332	27.332	98.849
OP11CE4	RWCE	600 - 700	n	12.6541	10	CEPHA	Cephalopod		36.561	36.561	211.282
OP11CE5	RWCE	500 - 600	n	14.9834	10	CEPHA	Cephalopod		36.877	36.877	216.084
OP11CE5	RWCE	500 - 600	n	14.9834	10	CEPHA	Cephalopod		39.076	39.076	251.363
OP11CE5	RWCE	500 - 600	n	14.9834	10	CEPHA	Cephalopod		28.416	28.416	109.415
OP12CE3	RWCE	300 - 400	d	18.9244	11.5	CEPHA	Cephalopod		23.42	23.42	66.0411
OP12CE3	RWCE	300 - 400	d	18.9244	11.5	CEPHA	Cephalopod		22.911	22.911	62.3589
OP12CE5	RWCE	100 - 200	d	19.7971	11.5	CEPHA	Cephalopod		27.291	27.291	98.4623
OP12CE6	RWCE	0 - 100	d	19.9618	11.5	CEPHA	Cephalopod		44.269	44.269	348.169
OP12CE6	RWCE	0 - 100	d	19.9618	11.5	CEPHA	Cephalopod		39.7	39.7	261.978
OP12CE6	RWCE	0 - 100	d	19.9618	11.5	CEPHA	Cephalopod		27.732	27.732	102.671
OP12CE6	RWCE	0 - 100	d	19.9618	11.5	CEPHA	Cephalopod		28.895	28.895	114.296
OP13CE2	RWCE	500 - 600	d	14.9834	11.5	CEPHA	Cephalopod		21.58	21.58	53.3374
OP13CE5	RWCE	200 - 300	d	19.5383	11.5	CEPHA	Cephalopod		20.724	20.724	47.9883
OP13CE5	RWCE	200 - 300	d	19.5383	11.5	CEPHA	Cephalopod		25.131	25.131	79.3909
OP13CE5	RWCE	200 - 300	d	19.5383	11.5	CEPHA	Cephalopod		24.608	24.608	75.149
OP13CE5	RWCE	200 - 300	d	19.5383	11.5	CEPHA	Cephalopod		22.447	22.447	59.115
OP13CE5	RWCE	200 - 300	d	19.5383	11.5	CEPHA	Cephalopod		23.343	23.343	65.4757
OP13CE5	RWCE	200 - 300	d	19.5383	11.5	CEPHA	Cephalopod		21.18	21.18	50.7944
OP13CE6	RWCE	100 - 200	d	19.7971	11.5	CEPHA	Cephalopod		28.679	28.679	112.079
OP14CE2	RWCE	400 - 500	n	17.2864	10	CEPHA	Cephalopod			50.863	500.31
OP14CE2	RWCE	400 - 500	n	17.2864	10	CEPHA	Cephalopod			20.647	47.5242
OP14CE4	RWCE	200 - 300	n	19.5383	10	CEPHA	Cephalopod		30.344	30.344	129.872
OP14CE4	RWCE	200 - 300	n	19.5383	10	CEPHA	Cephalopod		22.661	22.661	60.5978
OP14CE5	RWCE	100 - 200	n	19.7971	10	CEPHA	Cephalopod		22.789	22.789	61.4956
OP14CE5	RWCE	100 - 200	n	19.7971	10	CEPHA	Cephalopod		42.47	42.47	312.425
OP14CE6	RWCE	0 - 100	n	19.9618	10	CEPHA	Cephalopod		30.688	30.688	133.751
OP14CE6	RWCE	0 - 100	n	19.9618	10	CEPHA	Cephalopod		39.473	39.473	258.085
OP14CE6	RWCE	0 - 100	n	19.9618	10	CEPHA	Cephalopod		23.98	23.98	70.244
OP14CE6	RWCE	0 - 100	n	19.9618	10	CEPHA	Cephalopod		25.602	25.602	83.3348
OP31CE4	WCE	600 - 700	d	9.3664	11	CEPHA	Cephalopod		86.398	86.398	1995.42
OP31CE4	WCE	600 - 700	d	9.3664	11	CEPHA	Cephalopod		80.4	80.4	1653.66
OP31CE4	WCE	600 - 700	d	9.3664	11	CEPHA	Cephalopod		29.981	29.981	125.854
OP31CE4	WCE	600 - 700	d	9.3664	11	CEPHA	Cephalopod		42.399	42.399	311.063
OP31CE4	WCE	600 - 700	d	9.3664	11	CEPHA	Cephalopod		62.405	62.405	853.377
OP32CE6	WCE	0 - 100	d	18.5508	11	CEPHA	Cephalopod		27.939	27.939	104.684
OP32CE6	WCE	0 - 100	d	18.5508	11	CEPHA	Cephalopod		25.306	25.306	80.8425
OP32CE6	WCE	0 - 100	d	18.5508	11	CEPHA	Cephalopod		26.82	26.82	94.0869
OP32CE6	WCE	0 - 100	d	18.5508	11	CEPHA	Cephalopod		33.705	33.705	170.857
OP32CE6	WCE	0 - 100	d	18.5508	11	CEPHA	Cephalopod		35.645	35.645	197.739
OP32CE6	WCE	0 - 100	d	18.5508	11	CEPHA	Cephalopod		22.611	22.611	60.2493
OP33CE3	WCE	700 - 800	n	8.0507	9.5	CEPHA	Cephalopod		20.011	20.011	43.7962
OP34CE3	WCE	300 - 400	n	16.344	9.5	CEPHA	Cephalopod		28.177	28.177	107.028
OP34CE4	WCE	200 - 300	n	18.4041	9.5	CEPHA	Cephalopod		41.059	41.059	286.044
OP34CE4	WCE	200 - 300	n	18.4041	9.5	CEPHA	Cephalopod		29.36	29.36	119.161
OP34CE4	WCE	200 - 300	n	18.4041	9.5	CEPHA	Cephalopod		31.654	31.654	145.025
OP34CE6	WCE	0 - 100	n	18.5508	9.5	CEPHA	Cephalopod		66.744	66.744	1017.1
OP34CE6	WCE	0 - 100	n	18.5508	9.5	CEPHA	Cephalopod		61.909	61.909	835.781
OP34CE6	WCE	0 - 100	n	18.5508	9.5	CEPHA	Cephalopod		30.976	30.976	137.054
OP34CE6	WCE	0 - 100	n	18.5508	9.5	CEPHA	Cephalopod		27.242	27.242	98.0014
OP34CE6	WCE	0 - 100	n	18.5508	9.5	CEPHA	Cephalopod		33.885	33.885	173.25
OP34CE6	WCE	0 - 100	n	18.5508	9.5	CEPHA	Cephalopod		20.383	20.383	45.9539
OP34CE6	WCE	0 - 100	n	18.5508	9.5	CEPHA	Cephalopod		84.042	84.042	1856.45
OP3CE5	BCCE	100 - 200	n	16.5273	9	CHAET	Chaetognath			37.311	4.50819
OP3CE5	BCCE	100 - 200	n	16.5273	9	CHAET	Chaetognath			40.878	6.01294
OP3CE5	BCCE	100 - 200	n	16.5273	9	CHAET	Chaetognath			34.727	3.59482
OP3CE5	BCCE	100 - 200	n	16.5273	9	CHAET	Chaetognath			20.15	0.645622
OP3CE5	BCCE	100 - 200	n	16.5273	9	CHAET	Chaetognath			22.784	0.951232
OP3CE5	BCCE	100 - 200	n	16.5273	9	CHAET	Chaetognath			35.657	3.90736
OP3CE5	BCCE	100 - 200	n	16.5273	9	CHAET	Chaetognath			90.756	74.4321
OP3CE5	BCCE	100 - 200	n	16.5273	9	CHAET	Chaetognath			36.679	4.27167
OP3CE5	BCCE	100 - 200	n	16.5273	9	CHAET	Chaetognath			44.22	7.70455
OP3CE5	BCCE	100 - 200	n	16.5273	9	CHAET	Chaetognath			31.11	2.54095
OP3CE5	BCCE	100 - 200	n	16.5273	9	CHAET	Chaetognath			39.812	5.53206
OP3CE5	BCCE	100 - 200	n	16.5273	9	CHAET	Chaetognath			24.661	1.22107
OP3CE5	BCCE	100 - 200	n	16.5273	9	CHAET	Chaetognath			40.894	6.02037
OP3CE5	BCCE	100 - 200	n	16.5273	9	CHAET	Chaetognath			38.66	5.04267
OP3CE5	BCCE	100 - 200	n	16.5273	9	CHAET	Chaetognath			28.432	1.91284
OP3CE6	BCCE	0 - 100	n	19.6824	9	CHAET	Chaetognath			25.374	1.33594
OP3CE6	BCCE	0 - 100	n	19.6824	9	CHAET	Chaetognath			40.022	5.62463
OP3CE6	BCCE	0 - 100	n	19.6824	9	CHAET	Chaetognath			40.354	5.77314
OP3CE6	BCCE	0 - 100	n	19.6824	9	CHAET	Chaetognath			36.174	4.08888
OP3CE6	BCCE	0 - 100	n	19.6824	9	CHAET	Chaetognath			24.895	1.25799
OP6CE6	BCCE	0 - 100	n	19.6824	9	LCRUST	Decapod			20.879	4.61562
OP6CE6	BCCE	0 - 100	n	19.6824	9	LCRUST	Decapod			20.423	4.24533
OP7CE2	BCCE	800 - 1000	d	#N/A	11	MOLLUSC	Mollusc			44.075	17.8747
[truncated: 8,071 more rows]

## Sheet: EZ_2017
Table S2-2. Mesozooplankton samples collected on the south coast of Australia in September 2017. Where day_night designates the tow as occuring during the day of night, region is the eddy, length_mm is the lower limit of the size bin, dw_gm-2 is the average dry weight in each size bin, and N represents the number of replicates.
day_night	Region	Depth_range_m	length_mm	dw_gm-2	N
night	Brisbane Cold Core	500-400	500	0.0153231	2
night	Brisbane Cold Core	500-400	1000	0.0307531	2
night	Brisbane Cold Core	500-400	2000	0.0221142	2
night	Brisbane Cold Core	500-400	8000	0.0142748	2
night	Brisbane Cold Core	500-400	16000	0.0274866	2
night	Brisbane Cold Core	500-400	64000	0.0106029	1
night	Brisbane Cold Core	500-400	4000	0.00966505	2
night	Brisbane Cold Core	400-300	500	0.0241934	2
night	Brisbane Cold Core	400-300	1000	0.101097	2
night	Brisbane Cold Core	400-300	2000	0.0253837	2
night	Brisbane Cold Core	400-300	8000	0.00859184	2
night	Brisbane Cold Core	400-300	16000	0.00912399	2
night	Brisbane Cold Core	400-300	4000	0.000252074	2
night	Brisbane Cold Core	400-300	32000	0.0313695	1
night	Brisbane Cold Core	300-200	500	0.0153943	2
night	Brisbane Cold Core	300-200	1000	0.01519	2
night	Brisbane Cold Core	300-200	2000	0.0387319	2
night	Brisbane Cold Core	300-200	8000	0.00747024	2
night	Brisbane Cold Core	300-200	4000	0.00510767	1
night	Brisbane Cold Core	300-200	16000	0.00704291	2
night	Brisbane Cold Core	300-200	64000	0.00191214	1
night	Brisbane Cold Core	200-100	500	0.00820475	2
night	Brisbane Cold Core	200-100	1000	0.0023018	2
night	Brisbane Cold Core	200-100	2000	0.0270259	2
night	Brisbane Cold Core	200-100	8000	0.0119485	2
night	Brisbane Cold Core	200-100	4000	0.00439658	2
night	Brisbane Cold Core	100-0	64	0.0604969	2
night	Brisbane Cold Core	100-0	125	0.0329371	2
night	Brisbane Cold Core	100-0	250	0.0886225	2
night	Brisbane Cold Core	100-0	500	0.250937	4
night	Brisbane Cold Core	100-0	1000	0.221865	2
night	Brisbane Cold Core	100-0	2000	0.259935	2
night	Brisbane Cold Core	100-0	16000	0.0188268	2
night	Brisbane Cold Core	100-0	8000	0.0451878	2
night	Brisbane Cold Core	100-0	4000	0.0567888	2
night	Brisbane Cold Core	200-100	16000	0.000686016	1
night	Brisbane Cold Core	100-0	32000	1.18934e-05	1
day	Brisbane Cold Core	500-400	500	0.0177889	2
day	Brisbane Cold Core	500-400	1000	0.0293419	2
day	Brisbane Cold Core	500-400	2000	0.0137039	2
day	Brisbane Cold Core	500-400	16000	0.00490844	2
day	Brisbane Cold Core	500-400	32000	1.34228e-05	1
day	Brisbane Cold Core	500-400	64000	0.0805478	2
day	Brisbane Cold Core	400-300	500	0.0245731	2
day	Brisbane Cold Core	400-300	1000	0.0409484	2
day	Brisbane Cold Core	400-300	2000	0.0248335	2
day	Brisbane Cold Core	400-300	32000	0.0282685	1
day	Brisbane Cold Core	400-300	16000	0.0228155	2
day	Brisbane Cold Core	400-300	8000	0.00496183	2
day	Brisbane Cold Core	300-200	500	0.0193056	2
day	Brisbane Cold Core	300-200	1000	0.0396725	2
day	Brisbane Cold Core	300-200	2000	0.0500586	2
day	Brisbane Cold Core	300-200	64000	0.05479	2
day	Brisbane Cold Core	300-200	16000	0.0767718	2
day	Brisbane Cold Core	300-200	32000	0.0202478	2
day	Brisbane Cold Core	300-200	4000	0.0155966	2
day	Brisbane Cold Core	200-100	500	0.0528162	2
day	Brisbane Cold Core	200-100	1000	0.187129	2
day	Brisbane Cold Core	200-100	2000	0.0202073	2
day	Brisbane Cold Core	200-100	8000	0.0155765	2
day	Brisbane Cold Core	200-100	32000	0.0323825	2
day	Brisbane Cold Core	200-100	64000	0.0931812	1
day	Brisbane Cold Core	200-100	16000	0.0183436	2
day	Brisbane Cold Core	200-100	4000	0.0253754	2
day	Brisbane Cold Core	100-0	64	0.0352527	2
day	Brisbane Cold Core	100-0	125	0.0448511	2
day	Brisbane Cold Core	100-0	250	0.024387	2
day	Brisbane Cold Core	100-0	500	0.309976	4
day	Brisbane Cold Core	100-0	1000	0.211059	2
day	Brisbane Cold Core	100-0	2000	0.0930355	2
day	Brisbane Cold Core	100-0	4000	0.0623308	2
day	Brisbane Cold Core	100-0	16000	0.0345601	2
day	Brisbane Cold Core	100-0	32000	0.00149591	2
day	Brisbane Cold Core	100-0	8000	0.0180987	2
day	Brisbane Cold Core	500-400	4000	9.83284e-06	1
day	Brisbane Cold Core	500-400	8000	0.00213373	1
day	Brisbane Cold Core	400-300	4000	0.0167355	1
day	Brisbane Cold Core	300-200	8000	0.00184857	1
night	Retro Warm Core	500-400	500	0.0200599	1
night	Retro Warm Core	500-400	1000	0.0316464	1
night	Retro Warm Core	500-400	2000	0.0244733	1
night	Retro Warm Core	500-400	16000	0.0210456	1
night	Retro Warm Core	500-400	8000	0.00421224	1
night	Retro Warm Core	500-400	32000	0.0281081	1
night	Retro Warm Core	400-300	500	0.024363	1
night	Retro Warm Core	400-300	1000	0.0122086	1
night	Retro Warm Core	400-300	2000	0.0171138	1
night	Retro Warm Core	400-300	8000	0.00271676	1
night	Retro Warm Core	400-300	16000	0.0167825	1
night	Retro Warm Core	400-300	4000	0.0126735	1
night	Retro Warm Core	300-200	500	0.0166088	1
night	Retro Warm Core	300-200	1000	0.0276017	1
night	Retro Warm Core	300-200	2000	0.0305055	1
night	Retro Warm Core	300-200	32000	0.00703629	1
night	Retro Warm Core	300-200	16000	0.00612906	1
night	Retro Warm Core	300-200	8000	0.00249152	1
night	Retro Warm Core	200-100	500	0.0113858	1
night	Retro Warm Core	200-100	1000	0.0265076	1
night	Retro Warm Core	200-100	2000	0.0192095	1
night	Retro Warm Core	200-100	32000	0.0265604	1
night	Retro Warm Core	200-100	16000	0.0489695	1
night	Retro Warm Core	200-100	8000	0.00524119	1
night	Retro Warm Core	200-100	4000	0.00963381	1
night	Retro Warm Core	100-0	64	0.126202	1
night	Retro Warm Core	100-0	125	0.0415351	1
night	Retro Warm Core	100-0	250	0.109921	1
night	Retro Warm Core	100-0	500	0.245285	2
night	Retro Warm Core	100-0	1000	0.268355	1
night	Retro Warm Core	100-0	2000	0.0731798	1
night	Retro Warm Core	100-0	8000	0.00533114	1
night	Retro Warm Core	100-0	16000	0.00651316	1
night	Retro Warm Core	100-0	32000	2.19298e-06	1
day	Retro Warm Core	500-400	500	9.40734e-06	2
day	Retro Warm Core	500-400	1000	0.0337347	2
day	Retro Warm Core	500-400	2000	0.019238	2
day	Retro Warm Core	500-400	125000	0.206152	1
day	Retro Warm Core	500-400	64000	0.0657385	1
day	Retro Warm Core	500-400	16000	0.00810913	2
day	Retro Warm Core	500-400	8000	0.0332267	2
day	Retro Warm Core	500-400	4000	0.00990593	2
day	Retro Warm Core	400-300	500	0.010667	2
day	Retro Warm Core	400-300	1000	0.00901411	2
day	Retro Warm Core	400-300	2000	0.00329915	2
day	Retro Warm Core	400-300	32000	0.0111101	2
day	Retro Warm Core	400-300	16000	0.0115428	1
day	Retro Warm Core	400-300	8000	0.027968	2
day	Retro Warm Core	400-300	4000	0	1
day	Retro Warm Core	300-200	500	9.40734e-06	2
day	Retro Warm Core	300-200	1000	0.0324647	2
day	Retro Warm Core	300-200	2000	0.0172719	2
day	Retro Warm Core	300-200	32000	0.00225776	2
day	Retro Warm Core	300-200	16000	0.0424365	1
day	Retro Warm Core	300-200	4000	0.00427093	1
day	Retro Warm Core	200-100	500	0.0463405	2
day	Retro Warm Core	200-100	1000	0.083048	2
day	Retro Warm Core	200-100	2000	0.0416933	2
day	Retro Warm Core	200-100	32000	0.00416275	1
day	Retro Warm Core	200-100	16000	0.0120508	2
day	Retro Warm Core	200-100	8000	0.00912512	2
day	Retro Warm Core	200-100	4000	0.00577611	2
day	Retro Warm Core	100-0	64	0.0713538	1
day	Retro Warm Core	100-0	125	0.0459579	1
day	Retro Warm Core	100-0	250	0.0216411	1
day	Retro Warm Core	100-0	500	0.177261	2
day	Retro Warm Core	100-0	1000	0.134978	1
day	Retro Warm Core	100-0	2000	0.0407407	1
day	Retro Warm Core	100-0	16000	0.0139368	1
day	Retro Warm Core	100-0	32000	1.59642e-05	1
day	Retro Warm Core	100-0	8000	0.929933	1
night	Retro Warm Core	500-400	4000	0.0101808	1
night	Retro Warm Core	400-300	32000	1.39082e-05	1
night	Retro Warm Core	300-200	4000	0.0054395	1
night	Southern Cold Core	500-400	500	0.0191785	1
night	Southern Cold Core	500-400	1000	0.081539	1
night	Southern Cold Core	500-400	2000	0.024262	1
night	Southern Cold Core	500-400	8000	0.00712079	3
night	Southern Cold Core	500-400	16000	0.0232652	3
night	Southern Cold Core	500-400	32000	0.0285992	3
night	Southern Cold Core	500-400	4000	0.0264017	3
night	Southern Cold Core	400-300	500	0.04025	3
night	Southern Cold Core	400-300	1000	0.155033	3
night	Southern Cold Core	400-300	2000	0.0250437	2
night	Southern Cold Core	400-300	16000	0.0240112	3
night	Southern Cold Core	400-300	8000	0.00417681	3
night	Southern Cold Core	400-300	4000	0.00252439	3
night	Southern Cold Core	400-300	32000	0.14149	3
night	Southern Cold Core	300-200	500	0.0649184	2
night	Southern Cold Core	300-200	1000	0.112045	3
night	Southern Cold Core	300-200	2000	0.0337215	3
night	Southern Cold Core	300-200	32000	0.16572	3
night	Southern Cold Core	300-200	16000	0.243842	3
night	Southern Cold Core	300-200	8000	0.0229073	3
night	Southern Cold Core	300-200	4000	0.0179344	3
night	Southern Cold Core	200-100	500	0.121811	3
night	Southern Cold Core	200-100	1000	0.193363	2
night	Southern Cold Core	200-100	2000	0.0782051	1
night	Southern Cold Core	200-100	32000	0.415278	3
night	Southern Cold Core	200-100	16000	0.0589751	3
night	Southern Cold Core	200-100	8000	0.0138369	3
night	Southern Cold Core	100-0	64	0.0659999	2
night	Southern Cold Core	100-0	125	0.109171	3
night	Southern Cold Core	100-0	250	0.138017	3
night	Southern Cold Core	100-0	500	0.336776	3
night	Southern Cold Core	100-0	1000	0.467776	3
night	Southern Cold Core	100-0	2000	0.126531	3
night	Southern Cold Core	100-0	32000	0.0174729	5
night	Southern Cold Core	100-0	16000	0.0382716	3
night	Southern Cold Core	100-0	8000	0.0159705	3
night	Southern Cold Core	100-0	4000	0.0591436	1
night	Southern Cold Core	200-100	4000	0.00255586	3
night	Southern Cold Core	100-0	64000	0.118446	3
day	Southern Cold Core	400-300	4000	0.00071875	3
day	Southern Warm Core	500-400	500	0.0121356	1
day	Southern Warm Core	500-400	1000	0.0125175	1
day	Southern Warm Core	500-400	2000	0.0175233	1
day	Southern Warm Core	500-400	8000	0.0071137	1
day	Southern Warm Core	500-400	16000	0.0350292	1
day	Southern Warm Core	500-400	4000	0.0202041	1
day	Southern Warm Core	500-400	32000	0.000830904	1
day	Southern Warm Core	400-300	500	0.0133746	1
day	Southern Warm Core	400-300	1000	0.0389359	1
day	Southern Warm Core	400-300	2000	0.0707143	1
day	Southern Warm Core	400-300	32000	0.0221137	1
day	Southern Warm Core	400-300	16000	0.0345481	1
day	Southern Warm Core	400-300	8000	0.00695335	1
day	Southern Warm Core	400-300	4000	0.0131195	1
day	Southern Warm Core	300-200	500	0.0310977	1
day	Southern Warm Core	300-200	1000	0.036516	1
day	Southern Warm Core	300-200	2000	0.059519	1
day	Southern Warm Core	300-200	32000	0.0169534	1
day	Southern Warm Core	300-200	16000	0.0270845	1
day	Southern Warm Core	300-200	8000	0.0297959	1
day	Southern Warm Core	300-200	4000	0.00755102	1
day	Southern Warm Core	200-100	500	0.019672	1
day	Southern Warm Core	200-100	1000	0.101122	1
day	Southern Warm Core	200-100	2000	0.0826822	1
day	Southern Warm Core	200-100	4000	0.00814869	1
day	Southern Warm Core	200-100	32000	0.0324344	1
day	Southern Warm Core	200-100	16000	0.0597376	1
day	Southern Warm Core	200-100	8000	0.0190233	1
day	Southern Warm Core	100-0	64	0.0606465	1
day	Southern Warm Core	100-0	125	0.141823	1
day	Southern Warm Core	100-0	250	0.0124093	1
day	Southern Warm Core	100-0	500	0.111019	2
day	Southern Warm Core	100-0	1000	0.129523	1
day	Southern Warm Core	100-0	2000	0.108081	2
day	Southern Warm Core	100-0	4000	0.0313256	1
day	Southern Warm Core	100-0	16000	0.0279651	1
day	Southern Warm Core	100-0	8000	0.0149535	1
night	Southern Warm Core	500-400	500	0.00288095	1
night	Southern Warm Core	500-400	1000	0.157088	1
night	Southern Warm Core	500-400	2000	0.0313663	1
night	Southern Warm Core	500-400	8000	0.00919414	1
night	Southern Warm Core	500-400	16000	0.0327839	1
night	Southern Warm Core	500-400	32000	0.00419414	1
night	Southern Warm Core	500-400	4000	0.00899267	1
night	Southern Warm Core	400-300	500	0.103535	1
night	Southern Warm Core	400-300	1000	0.130952	1
night	Southern Warm Core	400-300	2000	0.114615	1
night	Southern Warm Core	400-300	4000	0.032141	1
night	Southern Warm Core	400-300	8000	0.00492674	1
night	Southern Warm Core	400-300	16000	0.0112637	1
night	Southern Warm Core	400-300	32000	0.00785714	1
night	Southern Warm Core	300-200	500	0.0326319	1
night	Southern Warm Core	300-200	1000	0.0443443	1
night	Southern Warm Core	300-200	2000	0.0168993	1
night	Southern Warm Core	300-200	32000	0.00565934	1
night	Southern Warm Core	300-200	4000	0.00263736	1
night	Southern Warm Core	300-200	8000	0.00384615	1
night	Southern Warm Core	300-200	16000	0.00227106	1
night	Southern Warm Core	200-100	500	0.0169048	1
night	Southern Warm Core	200-100	1000	0.0330788	1
night	Southern Warm Core	200-100	2000	0.125549	1
night	Southern Warm Core	200-100	16000	0.00525641	1
night	Southern Warm Core	200-100	8000	0.00864469	1
night	Southern Warm Core	200-100	4000	0.00441392	1
night	Southern Warm Core	100-0	64	0.0734516	1
night	Southern Warm Core	100-0	125	0.774677	1
night	Southern Warm Core	100-0	250	0.471935	1
night	Southern Warm Core	100-0	500	1.69373	1
night	Southern Warm Core	100-0	1000	0.0279214	1
night	Southern Warm Core	100-0	2000	0.0277399	1
night	Southern Warm Core	100-0	8000	0.0586492	1
night	Southern Warm Core	100-0	4000	0.00153226	2

## Sheet: EZ_2015
Table S2-3. Mesozooplankton samples collected on the south coast of Australia in June 2015. Where region is the location sampled in relation to the eddy (centre vs. edge), day_night designates the sample as being collected during day or night, bin_lower_lim_mm is the lower limit of the size bin, and dry_weight_mgm-2 is the total dry weight in the size bin (mg m-2)
Tow number	Region	day_night	Depth_range_m	bin_lower_lim_mm	dry_weight_mgm-2
EZ17	Foster Eddy, outside	night	100-0	0.5	155.547
EZ17	Foster Eddy, outside	night	100-0	1	301.459
EZ17	Foster Eddy, outside	night	100-0	2	127.927
EZ17	Foster Eddy, outside	night	100-0	4	166.593
EZ17	Foster Eddy, outside	night	100-0	8	101.056
EZ17	Foster Eddy, outside	night	100-0	16	47.2226
EZ17	Foster Eddy, outside	night	100-0	32	29.0058
EZ17	Foster Eddy, outside	night	200-100	0.5	37.8743
EZ17	Foster Eddy, outside	night	200-100	1	66.2964
EZ17	Foster Eddy, outside	night	200-100	2	22.9555
EZ17	Foster Eddy, outside	night	200-100	4	30.3822
EZ17	Foster Eddy, outside	night	200-100	8	36.0993
EZ17	Foster Eddy, outside	night	200-100	16	68.3524
EZ17	Foster Eddy, outside	night	200-100	32	34.2165
EZ17	Foster Eddy, outside	night	200-100	64	27.3429
EZ17	Foster Eddy, outside	night	300-200	0.5	12.6984
EZ17	Foster Eddy, outside	night	300-200	1	15.0196
EZ17	Foster Eddy, outside	night	300-200	2	73.1012
EZ17	Foster Eddy, outside	night	300-200	4	13.5859
EZ17	Foster Eddy, outside	night	300-200	8	45.9208
EZ17	Foster Eddy, outside	night	300-200	16	17.363
EZ17	Foster Eddy, outside	night	300-200	32	26.1529
EZ17	Foster Eddy, outside	night	400-300	0.5	6.92193
EZ17	Foster Eddy, outside	night	400-300	1	9.84842
EZ17	Foster Eddy, outside	night	400-300	2	5.95812
EZ17	Foster Eddy, outside	night	400-300	4	12.9501
EZ17	Foster Eddy, outside	night	400-300	8	3.09034
EZ17	Foster Eddy, outside	night	400-300	16	47.6991
EZ17	Foster Eddy, outside	night	400-300	32	6.22448
EZ17	Foster Eddy, outside	night	500-400	0.5	3.87196
EZ17	Foster Eddy, outside	night	500-400	1	10.2155
EZ17	Foster Eddy, outside	night	500-400	2	9.5414
EZ17	Foster Eddy, outside	night	500-400	8	73.6227
EZ17	Foster Eddy, outside	night	500-400	16	41.859
EZ18	Foster Eddy, outside	night	100-0	0.5	171.857
EZ18	Foster Eddy, outside	night	100-0	1	305.515
EZ18	Foster Eddy, outside	night	100-0	2	336.017
EZ18	Foster Eddy, outside	night	100-0	4	124.325
EZ18	Foster Eddy, outside	night	100-0	8	89.1361
EZ18	Foster Eddy, outside	night	100-0	16	143.276
EZ18	Foster Eddy, outside	night	100-0	32	72.6125
EZ18	Foster Eddy, outside	night	100-0	64	26.1769
EZ18	Foster Eddy, outside	night	200-100	0.5	42.3573
EZ18	Foster Eddy, outside	night	200-100	1	70.8333
EZ18	Foster Eddy, outside	night	200-100	2	51.6078
EZ18	Foster Eddy, outside	night	200-100	4	38.4737
EZ18	Foster Eddy, outside	night	200-100	8	36.2217
EZ18	Foster Eddy, outside	night	200-100	16	47.6868
EZ18	Foster Eddy, outside	night	200-100	32	38.6322
EZ18	Foster Eddy, outside	night	300-200	0.5	19.2789
EZ18	Foster Eddy, outside	night	300-200	1	17.0128
EZ18	Foster Eddy, outside	night	300-200	2	18.1797
EZ18	Foster Eddy, outside	night	300-200	8	78.8798
EZ18	Foster Eddy, outside	night	300-200	16	35.6779
EZ18	Foster Eddy, outside	night	300-200	32	21.4936
EZ18	Foster Eddy, outside	night	300-200	64	336.663
EZ18	Foster Eddy, outside	night	400-300	0.5	22.4286
EZ18	Foster Eddy, outside	night	400-300	1	24.1734
EZ18	Foster Eddy, outside	night	400-300	2	17.6727
EZ18	Foster Eddy, outside	night	400-300	4	11.7912
EZ18	Foster Eddy, outside	night	400-300	8	8.85887
EZ18	Foster Eddy, outside	night	400-300	16	32.3878
EZ18	Foster Eddy, outside	night	400-300	32	83.5796
EZ18	Foster Eddy, outside	night	500-400	0.5	22.4218
EZ18	Foster Eddy, outside	night	500-400	1	26.5597
EZ18	Foster Eddy, outside	night	500-400	2	29.0938
EZ18	Foster Eddy, outside	night	500-400	8	32.3368
EZ18	Foster Eddy, outside	night	500-400	16	62.8933
EZ18	Foster Eddy, outside	night	500-400	32	11.3873
EZ19	Foster Eddy Center	day	100-0	0.5	215.258
EZ19	Foster Eddy Center	day	100-0	1	266.084
EZ19	Foster Eddy Center	day	100-0	2	60.312
EZ19	Foster Eddy Center	day	100-0	8	215.745
EZ19	Foster Eddy Center	day	200-100	0.5	13.9193
EZ19	Foster Eddy Center	day	200-100	1	31.7919
EZ19	Foster Eddy Center	day	200-100	2	10.5912
EZ19	Foster Eddy Center	day	200-100	8	7.82385
EZ19	Foster Eddy Center	day	200-100	16	50.3245
EZ19	Foster Eddy Center	day	200-100	64	5.31397
EZ19	Foster Eddy Center	day	300-200	0.5	49.8079
EZ19	Foster Eddy Center	day	300-200	1	86.9594
EZ19	Foster Eddy Center	day	300-200	2	45.2784
EZ19	Foster Eddy Center	day	300-200	4	26.6127
EZ19	Foster Eddy Center	day	300-200	16	41.2395
EZ19	Foster Eddy Center	day	400-300	0.5	18.5609
EZ19	Foster Eddy Center	day	400-300	1	53.9437
EZ19	Foster Eddy Center	day	400-300	2	20.3531
EZ19	Foster Eddy Center	day	400-300	4	18.0995
EZ19	Foster Eddy Center	day	400-300	16	9.31861
EZ19	Foster Eddy Center	day	400-300	64	22.7664
EZ19	Foster Eddy Center	day	500-400	0.5	27.9201
EZ19	Foster Eddy Center	day	500-400	1	57.2047
EZ19	Foster Eddy Center	day	500-400	2	38.802
EZ19	Foster Eddy Center	day	500-400	8	92.9451
EZ19	Foster Eddy Center	day	500-400	16	73.0616
EZ20	Foster Eddy Center	day	100-0	0.5	210.22
EZ20	Foster Eddy Center	day	100-0	1	264.218
EZ20	Foster Eddy Center	day	100-0	2	114.993
EZ20	Foster Eddy Center	day	100-0	4	1.21189
EZ20	Foster Eddy Center	day	100-0	8	17.991
EZ20	Foster Eddy Center	day	100-0	16	124.838
EZ20	Foster Eddy Center	day	100-0	64	3.87556
EZ20	Foster Eddy Center	day	200-100	0.5	40.243
EZ20	Foster Eddy Center	day	200-100	1	47.5576
EZ20	Foster Eddy Center	day	200-100	2	23.9276
EZ20	Foster Eddy Center	day	200-100	4	2.28614
EZ20	Foster Eddy Center	day	200-100	8	2.66551
EZ20	Foster Eddy Center	day	200-100	16	7.41384
EZ20	Foster Eddy Center	day	400-200	0.5	59.8246
EZ20	Foster Eddy Center	day	400-200	1	94.5781
EZ20	Foster Eddy Center	day	400-200	2	31.7794
EZ20	Foster Eddy Center	day	400-200	4	13.0117
EZ20	Foster Eddy Center	day	400-200	8	14.6044
EZ20	Foster Eddy Center	day	400-200	16	47.9795
EZ20	Foster Eddy Center	day	500-400	0.5	38.1439
EZ20	Foster Eddy Center	day	500-400	1	56.5341
EZ20	Foster Eddy Center	day	500-400	2	38.7121
EZ20	Foster Eddy Center	day	500-400	8	21.1364
EZ20	Foster Eddy Center	day	500-400	16	37.9413
EZ20	Foster Eddy Center	day	600-500	0.5	17.9357
EZ20	Foster Eddy Center	day	600-500	1	81.85
EZ20	Foster Eddy Center	day	600-500	2	58.6173
EZ20	Foster Eddy Center	day	600-500	4	2.24148
EZ20	Foster Eddy Center	day	600-500	8	47.6728
EZ20	Foster Eddy Center	day	600-500	16	17.1139
EZ20	Foster Eddy Center	day	600-500	32	2.26582
EZ21	Foster Eddy Center	night	100-0	0.5	359.156
EZ21	Foster Eddy Center	night	100-0	1	542.111
EZ21	Foster Eddy Center	night	100-0	2	228.222
EZ21	Foster Eddy Center	night	100-0	4	169.644
EZ21	Foster Eddy Center	night	100-0	8	130.191
EZ21	Foster Eddy Center	night	100-0	16	200.453
EZ21	Foster Eddy Center	night	100-0	32	44.7378
EZ21	Foster Eddy Center	night	100-0	125	24.2889
EZ21	Foster Eddy Center	night	200-100	0.5	32.7892
EZ21	Foster Eddy Center	night	200-100	1	72.3285
EZ21	Foster Eddy Center	night	200-100	2	52.4186
EZ21	Foster Eddy Center	night	200-100	4	4.21232
EZ21	Foster Eddy Center	night	200-100	8	22.3495
EZ21	Foster Eddy Center	night	200-100	16	69.4331
EZ21	Foster Eddy Center	night	200-100	32	40.4597
EZ21	Foster Eddy Center	night	300-200	0.5	18.8634
EZ21	Foster Eddy Center	night	300-200	1	36.8979
EZ21	Foster Eddy Center	night	300-200	2	32.1267
EZ21	Foster Eddy Center	night	300-200	4	27.3206
EZ21	Foster Eddy Center	night	300-200	8	89.4907
EZ21	Foster Eddy Center	night	300-200	16	149.313
EZ21	Foster Eddy Center	night	300-200	32	40.0755
EZ21	Foster Eddy Center	night	300-200	64	0.163213
EZ21	Foster Eddy Center	night	400-300	0.5	8.70748
EZ21	Foster Eddy Center	night	400-300	1	24.6863
EZ21	Foster Eddy Center	night	400-300	2	33.4694
EZ21	Foster Eddy Center	night	400-300	8	2.09221
EZ21	Foster Eddy Center	night	400-300	16	33.8949
EZ21	Foster Eddy Center	night	400-300	32	8.45805
EZ21	Foster Eddy Center	night	500-400	0.5	19.1855
EZ21	Foster Eddy Center	night	500-400	1	82.0944
EZ21	Foster Eddy Center	night	500-400	2	70.5365
EZ21	Foster Eddy Center	night	500-400	4	3.05882
EZ21	Foster Eddy Center	night	500-400	8	84.9593
EZ21	Foster Eddy Center	night	500-400	16	22.9024
EZ22	Foster Eddy Center	night	100-0	0.5	317.018
EZ22	Foster Eddy Center	night	100-0	1	649.636
EZ22	Foster Eddy Center	night	100-0	2	269.036
EZ22	Foster Eddy Center	night	100-0	4	195.964
EZ22	Foster Eddy Center	night	100-0	8	159.091
EZ22	Foster Eddy Center	night	100-0	16	282.04
EZ22	Foster Eddy Center	night	100-0	32	74.0636
EZ22	Foster Eddy Center	night	100-0	64	55.6727
EZ22	Foster Eddy Center	night	200-100	0.5	35.3279
EZ22	Foster Eddy Center	night	200-100	1	85.6472
EZ22	Foster Eddy Center	night	200-100	2	58.6364
EZ22	Foster Eddy Center	night	200-100	8	24.3684
EZ22	Foster Eddy Center	night	200-100	16	39.9857
EZ22	Foster Eddy Center	night	200-100	32	56.329
EZ22	Foster Eddy Center	night	300-200	0.5	16.6414
EZ22	Foster Eddy Center	night	300-200	1	44.9763
EZ22	Foster Eddy Center	night	300-200	2	44.7339
EZ22	Foster Eddy Center	night	300-200	4	15.6518
EZ22	Foster Eddy Center	night	300-200	8	17.3483
EZ22	Foster Eddy Center	night	300-200	16	42.3952
EZ22	Foster Eddy Center	night	400-300	0.5	14.258
EZ22	Foster Eddy Center	night	400-300	1	34.7896
EZ22	Foster Eddy Center	night	400-300	2	35.3599
EZ22	Foster Eddy Center	night	400-300	8	9.4331
EZ22	Foster Eddy Center	night	400-300	16	17.1165
EZ22	Foster Eddy Center	night	500-400	0.5	34.9853
EZ22	Foster Eddy Center	night	500-400	1	72.8466
EZ22	Foster Eddy Center	night	500-400	2	74.5218
EZ22	Foster Eddy Center	night	500-400	8	55.5354
EZ22	Foster Eddy Center	night	500-400	16	156.92
EZ22	Foster Eddy Center	night	500-400	32	14.3096
EZ23	Foster Eddy, outside	day	100-0	0.5	187.618
EZ23	Foster Eddy, outside	day	100-0	1	186.04
EZ23	Foster Eddy, outside	day	100-0	2	59.1163
EZ23	Foster Eddy, outside	day	100-0	4	7.25419
EZ23	Foster Eddy, outside	day	100-0	8	7.78344
EZ23	Foster Eddy, outside	day	100-0	16	61.1313
EZ23	Foster Eddy, outside	day	100-0	64	6.52221
EZ23	Foster Eddy, outside	day	200-100	0.5	52.247
EZ23	Foster Eddy, outside	day	200-100	1	32.8236
EZ23	Foster Eddy, outside	day	200-100	2	15.6181
EZ23	Foster Eddy, outside	day	200-100	8	5.77098
EZ23	Foster Eddy, outside	day	200-100	16	27.3328
EZ23	Foster Eddy, outside	day	200-100	32	2.4536
EZ23	Foster Eddy, outside	day	200-100	64	7.63161
EZ23	Foster Eddy, outside	day	300-200	0.5	56.091
EZ23	Foster Eddy, outside	day	300-200	1	74.6075
EZ23	Foster Eddy, outside	day	300-200	2	29.381
EZ23	Foster Eddy, outside	day	300-200	4	2.93088
EZ23	Foster Eddy, outside	day	300-200	8	0.579318
EZ23	Foster Eddy, outside	day	300-200	16	54.3521
EZ23	Foster Eddy, outside	day	400-300	0.5	46.4166
EZ23	Foster Eddy, outside	day	400-300	1	51.1272
EZ23	Foster Eddy, outside	day	400-300	2	59.8419
EZ23	Foster Eddy, outside	day	400-300	4	4.33715
EZ23	Foster Eddy, outside	day	400-300	8	4.95458
EZ23	Foster Eddy, outside	day	400-300	16	33.406
EZ23	Foster Eddy, outside	day	400-300	32	15.1581
EZ23	Foster Eddy, outside	day	500-400	0.5	17.1466
EZ23	Foster Eddy, outside	day	500-400	1	53.8111
EZ23	Foster Eddy, outside	day	500-400	2	40.6515
EZ23	Foster Eddy, outside	day	500-400	4	2.06124
EZ23	Foster Eddy, outside	day	500-400	8	28.2893
EZ23	Foster Eddy, outside	day	500-400	8	28.2893
EZ23	Foster Eddy, outside	day	500-400	16	27.1961
EZ24	Foster Eddy, outside	day	100-0	0.5	244.455
EZ24	Foster Eddy, outside	day	100-0	1	239.236
EZ24	Foster Eddy, outside	day	100-0	2	96.3112
EZ24	Foster Eddy, outside	day	100-0	4	122.429
EZ24	Foster Eddy, outside	day	100-0	8	1.77678
EZ24	Foster Eddy, outside	day	100-0	125	259.412
EZ24	Foster Eddy, outside	day	200-100	0.5	22.3208
EZ24	Foster Eddy, outside	day	200-100	1	17.5166
EZ24	Foster Eddy, outside	day	200-100	2	12.5893
EZ24	Foster Eddy, outside	day	200-100	4	1.88224
EZ24	Foster Eddy, outside	day	200-100	8	19.8817
EZ24	Foster Eddy, outside	day	200-100	16	22.4058
EZ24	Foster Eddy, outside	day	200-100	32	15.3769
EZ24	Foster Eddy, outside	day	200-100	64	4.35575
EZ24	Foster Eddy, outside	day	200-100	125	461.826
EZ24	Foster Eddy, outside	day	300-200	0.5	79.3637
EZ24	Foster Eddy, outside	day	300-200	1	66.7919
EZ24	Foster Eddy, outside	day	300-200	2	53.7119
EZ24	Foster Eddy, outside	day	300-200	16	31.8935
EZ24	Foster Eddy, outside	day	400-300	0.5	31.7846
EZ24	Foster Eddy, outside	day	400-300	1	161.777
EZ24	Foster Eddy, outside	day	400-300	2	28.8008
EZ24	Foster Eddy, outside	day	400-300	8	3.42009
EZ24	Foster Eddy, outside	day	400-300	16	30.4143
EZ24	Foster Eddy, outside	day	400-300	32	2.53223
EZ24	Foster Eddy, outside	day	500-400	0.5	29.332
EZ24	Foster Eddy, outside	day	500-400	1	66.6003
EZ24	Foster Eddy, outside	day	500-400	2	28.0134
EZ24	Foster Eddy, outside	day	500-400	8	7.98109
EZ24	Foster Eddy, outside	day	500-400	16	76.5929
